# Supplementary material
Source: publisher figshare collection journal article supplement (https://tandf.figshare.com/articles/dataset/_/19360996)
Supplement: Supplementary file 2 [file 2]

| id  | Protein IDs                       | Protein names                                                                                                   | Gene names           | direction | label    | group                     | log2(CTS/PSB 1) | log2(CTS/PSB 2) | ratio count |
|-----|-----------------------------------|-----------------------------------------------------------------------------------------------------------------|----------------------|-----------|----------|---------------------------|-----------------|-----------------|-------------|
| 0   | A0A024QZ42;Q75340-2;Q75340;HOV5   | Programmed cell death protein 6                                                                                 | PCDC6                | CTS/PSB   | PCDC6    | not considered/background |                 |                 | 0           |
| 3   | P15787;A0A024ARA52;C9JCK5;H3B716  | Proteasome subunit alpha type 2;Proteasome subunit alpha type 2                                                 | PSMA2                | CTS/PSB   | PSMA2    | not considered/background | 0.115432826     | -0.151599802    | 2           |
| 5   | A0A075865;Q8NB81-1;Q8NB81-1;Q8    | Protein enabled homolog                                                                                         | ENAH                 | CTS/PSB   | ENAH     | not considered/background |                 | -0.507109594    | 0           |
| 6   | A0A07586G3;A0ASH1ZRP9;P11532-4    | Dystrophin                                                                                                      | DMD                  | CTS/PSB   | DMD      | not considered/background |                 |                 | 1           |
| 7   | V9G9V7;Q00213-4;A0A087X0V7;A0001  | Amyloid beta A4 precursor protein-binding family B member 1                                                     | APBB1                | CTS/PSB   | APBB1    | not considered/background | -0.030324537    |                 | 0           |
| 8   | K16881;Q16881-2;A0A087WS99;Q16    | Thioredoxin reductase 1, cytoplasmic                                                                            | TXNRD1               | CTS/PSB   | TXNRD1   | not considered/background | -0.021775077    | -0.039278795    | 2           |
| 9   | K7ERP4;P36969-2;A0A087X2U2;P369   | Glutathione peroxidase;Phospholipid hydroperoxide glutathione peroxidase, mitochondrial                         | GPX4                 | CTS/PSB   | GPX4     | not considered/background | -0.075413596    | 0.212734717     | 2           |
| 11  | A0A087WXD2;H7C5T8;H7CAU7;H7C5     | Membrane-associated guanylate kinase, WW and PDZ domain-containing protein 1                                    | MAGI1                | CTS/PSB   | MAGI1    | not considered/background | -0.20413333     | -0.187514398    | 2           |
| 14  | Q8C0A2-2;A0A087W795;H795          | Acyl-coenzyme A thioesterase 1;Acyl-coenzyme A thioesterase 2, mitochondrial                                    | ACOT1;ACOT2          | CTS/PSB   | ACOT1    | not considered/background |                 | 0.181902061     | 1           |
| 17  | A0A087W792;A0A087W792;Q8B9J2      | Centrin-associated protein-like 1                                                                               | CNTNAP4              | CTS/PSB   | CNTNAP4  | not considered/background |                 |                 | 0           |
| 17  | Q75251;A0A087WV66;A0A087WT13;F    | NADH dehydrogenase [ubiquinone] iron-sulfur protein 7, mitochondrial                                            | NDUF57               | CTS/PSB   | NDUF57   | not considered/background |                 | 0.267739485     | 1           |
| 18  | Q12913-2;Q12913;A0A087WTK0;A0A    | Receptor-type tyrosine-protein phosphatase eta;Protein-tyrosine-phosphatase                                     | PTPRJ                | CTS/PSB   | PTPRJ    | not considered/background |                 |                 | 0           |
| 19  | A0A087WZ85;A0A0A0MSK4;Q9Y6N7-4    | Roundabout homolog 1                                                                                            | ROBO1                | CTS/PSB   | ROBO1    | not considered/background |                 | -0.129841557    | 1           |
| 20  | Q92945;A0A087WTP3;MOR015;MOQX     | Far upstream element-binding protein 2                                                                          | KHSRP                | CTS/PSB   | KHSRP    | not considered/background |                 |                 | 0           |
| 21  | E7EQ49;A0A087WT02;Q9Y2I8-3;Q9Y2   | WD repeat-containing protein 37                                                                                 | WDR37                | CTS/PSB   | WDR37    | not considered/background |                 |                 | 1           |
| 23  | P11940;E7EQ3;P11940-2;A0A087W1    | Polyadenylate-binding protein 1;Polyadenylate-binding protein                                                   | PABPC1               | CTS/PSB   | PABPC1   | not considered/background | -0.065853419    | -0.242206149    | 2           |
| 27  | E9PFI5;P51790-4;A0A087WU31;P51    | Chloride channel protein;Hv1[Cl] exchange transporter 3                                                         | CLCN3                | CTS/PSB   | CLCN3    | not considered/background |                 | 0.175680195     | 1           |
| 28  | A0A062JMS5;A0A087WU62;Q8B9J2      | 35S ribosomal protein L45, mitochondrial                                                                        | MRPL45               | CTS/PSB   | MRPL45   | not considered/background |                 |                 | 0           |
| 29  | Q15005;A0A087WUUC;E9PFI6;E9P10    | Signal peptidase complex subunit 2                                                                              | SPCS2                | CTS/PSB   | SPCS2    | not considered/background | 0.077789889     | -0.093019233    | 2           |
| 31  | Q14979-3;Q14979-2;A0A087WUK2;Q    | Heterogeneous nuclear ribonucleoprotein D-like                                                                  | HNRNPDL              | CTS/PSB   | HNRNPDL  | not considered/background |                 |                 | 0           |
| 32  | Q86TG7-2;A0A087WZG9;B4D5P0;A0A    | Retrotransposon-derived protein PEG10                                                                           | PEG10                | CTS/PSB   | PEG10    | not considered/background |                 |                 | 0           |
| 33  | Q9UNM6;A0A087WUJ9;Q9UNM6-2;J2     | 26S proteasome non-ATPase regulatory subunit 13                                                                 | PSMD13               | CTS/PSB   | PSMD13   | not considered/background | 0.036327492     |                 | 1           |
| 34  | P07203;A0A087WUQ6;A0A2R8Y6B6      | Glutathione peroxidase 1;Glutathione peroxidase                                                                 | GPX1                 | CTS/PSB   | GPX1     | not considered/background | 0.260748328     |                 | 1           |
| 35  | F8W7C6;A0A087WV22;X1W128;P276     | 60S ribosomal protein L10                                                                                       | RPL10                | CTS/PSB   | RPL10    | not considered/background |                 | 0.175680195     | 1           |
| 36  | P20711-3;A0A087WV26;P20711-3;H7B  | Aromatic L-amino acid decarboxylase                                                                             | RPL10B               | CTS/PSB   | RPL10B   | not considered/background | 0.239764627     | -0.019530756    | 2           |
| 38  | Q06T83;A0A087WU46;Q6UBR3;B7ZM     | 999;HOG Monofunctional C1-tetrahydrofolate synthase, mitochondrial                                              | MTHFD1L              | CTS/PSB   | MTHFD1L  | not considered/background | 0.288771167     |                 | 1           |
| 39  | Q00610-2;Q00610;A0A087WVQ6;J3K    | Clathrin heavy chain 1;Clathrin heavy chain                                                                     | CLTC                 | CTS/PSB   | CLTC     | not considered/background | -0.019199619    | 0.200780038     | 2           |
| 40  | A0A087WVW7;Q9P2E9-3;Q9P2E9;F8W    | Ribosome-binding protein 1                                                                                      | RBP1                 | CTS/PSB   | RBP1     | not considered/background | 0.039559557     | 0.17825972      | 2           |
| 41  | Q9Y371;Q9Y371-2;A0A087WV40;Q9     | Endophilin-B1                                                                                                   | SH3GLB1              | CTS/PSB   | SH3GLB1  | not considered/background | 0.09071796      | -0.105946212    | 2           |
| 43  | B4DGL8;E75027-3;A0A087WV65;Q7     | ATP-binding cassette sub-family B member 7, mitochondrial                                                       | ABC87                | CTS/PSB   | ABC87    | not considered/background | 0.298775603     |                 | 1           |
| 44  | Q9P601-2;Q9P601;A0A087WV66;H7     | 26S proteasome non-ATPase regulatory subunit 1                                                                  | PSMD1                | CTS/PSB   | PSMD1    | not considered/background | -0.147313948    | 0.325973307     | 2           |
| 45  | A0A087WVW7;Q15734                 | Lethal 2 [giant larva protein-like]                                                                             | LIGL1                | CTS/PSB   | LIGL1    | not considered/background |                 |                 | 0           |
| 47  | A0A087WV55;Q043617-2;Q043617;A0A  | Trafficking protein particle complex subunit 3                                                                  | TRAPP3               | CTS/PSB   | TRAPP3   | not considered/background |                 | -0.607010666    | 1           |
| 48  | HOYN16;HOYLV5;Q9P2T1-2;F8WAN9     | J A GMP reductase;GMP reductase 2                                                                               | GMPR2                | CTS/PSB   | GMPR2    | not considered/background |                 |                 | 0           |
| 49  | Q9HC4-2;A0A087WVW5;E9HCK4;Q       | Roundabout homolog 2                                                                                            | ROBO2                | CTS/PSB   | ROBO2    | not considered/background | 1.465347637     |                 | 1           |
| 50  | J3KTC8;Q7Z511-7;Q7Z511-4;Q7Z511-5 | Hydroxysteroid 11-beta-dehydrogenase 1-like protein                                                             | HSD11B1L             | CTS/PSB   | HSD11B1L | not considered/background |                 |                 | 0           |
| 52  | A0A087WX02;P63302;F8WB74;MOO      | Selenoprotein W                                                                                                 | SEPW1                | CTS/PSB   | SEPW1    | not considered/background |                 |                 | 0           |
| 53  | Q13148;A0A087WX29;A0A087WY00;T    | A RNA-binding protein 43                                                                                        | TARDBP;TDPA43        | CTS/PSB   | TARDBP   | not considered/background | 0.255077682     | 0.845805675     | 2           |
| 54  | Q92599;A0A087WV26;E7ESZ7;Q9529    | NADH dehydrogenase [ubiquinone] 1 alpha subcomplex subunit 10, mitochondrial                                    | NDUFA10              | CTS/PSB   | NDUFA10  | not considered/background | 0.09328973      | 0.096821031     | 2           |
| 54  | Q8U6T2;A0A087WV01                 | Sodium/hydrogen exchanger 7;Sodium/hydrogen exchanger                                                           | SLC9A7               | CTS/PSB   | SLC9A7   | not considered/background |                 |                 | 0           |
| 58  | A0A087WXM6;J3Q0T2;J3KRX5;P1862    | 60S ribosomal protein L17                                                                                       | RPL17                | CTS/PSB   | RPL17    | not considered/background | -0.044419367    | 0.147266015     | 2           |
| 59  | A0A087WXM8;P50895;K7ENUB;K7ER1    | Basal cell adhesion molecule                                                                                    | BCAM                 | CTS/PSB   | BCAM     | not considered/background | 0.164400135     | 0.307608513     | 2           |
| 60  | A0A087WXM9;Q765P7                 | MTSS1-like protein                                                                                              | MTSS1L               | CTS/PSB   | MTSS1L   | not considered/background |                 | 0.115347381     | 1           |
| 61  | Q9NWS8-2;A0A087WXU0;A0A2R8V4      | Required for meiotic nuclear division protein 1 homolog                                                         | RMND1                | CTS/PSB   | RMND1    | not considered/background |                 | 0.102325863     | 1           |
| 62  | A0A499FXH8;H7BXK1;A0A087W0G8      | Extended synaptotagmin 2                                                                                        | ESYT2                | CTS/PSB   | ESYT2    | not considered/background | -0.499116383    | -0.150689643    | 2           |
| 63  | Q9Y411-3;A0A087WV00;F8W6W5;F8W    | Uncoupling protein 1;Uncoupling protein 1                                                                       | UCP1                 | CTS/PSB   | UCP1     | not considered/background |                 | 0.393879986     | 1           |
| 64  | Q8U6T2;A0A087WV01                 | Thrombospondin type 1 domain-containing protein 7A                                                              | THSD7A               | CTS/PSB   | THSD7A   | not considered/background | 0.031677496     |                 | 0           |
| 65  | A0A087WV55;Q9NP79;Q9NP79-2;Q5T    | Vacuolar protein sorting-associated protein VTA1 homolog                                                        | VTA1                 | CTS/PSB   | VTA1     | not considered/background | -0.138854519    | -0.243912759    | 2           |
| 66  | Q96WC1-2;A0A087WY11;Q96CW1;E9     | A P-2 complex subunit mu                                                                                        | AP2M1                | CTS/PSB   | AP2M1    | not considered/background | 0.244887059     | -0.09909111     | 2           |
| 67  | A0A087WVY7;Q6UXV4;A0A087WVX8      | MICOS complex subunit MIC27                                                                                     | APOL                 | CTS/PSB   | APOL     | not considered/background | 0.462366483     | 0.176136533     | 2           |
| 69  | Q6UXD5-5;Q6UXD5-2;A0A087WV15;Q    | Seizure 6-like protein 2                                                                                        | SEZ6L2               | CTS/PSB   | SEZ6L2   | not considered/background | 0.192951618     | 0.009814782     | 2           |
| 71  | Q43399-2;Q43399-4;Q43399;Q43399   | Tumor protein D54                                                                                               | TPD52L2              | CTS/PSB   | TPD52L2  | not considered/background | 0.776356071     | -0.290986181    | 2           |
| 72  | Q15185-3;Q15185-4;Q15185;A0A087   | Prostaglandin F synthase 3                                                                                      | PTGS3                | CTS/PSB   | PTGS3    | not considered/background | 0.019346089     | -0.183200647    | 2           |
| 73  | Q96519-3;Q96519-2;A0A087WVU2;Q    | UPF0585 protein C16orf13                                                                                        | CL6orf13             | CTS/PSB   | CL6orf13 | not considered/background |                 |                 | 0           |
| 74  | P57105;A0A087X1F5;A0A087WV9A;A    | Synaptotagmin-2-binding protein                                                                                 | SYN2BP;SYN2BP-COX16  | CTS/PSB   | SYN2BP   | not considered/background |                 | 0.07105745      | 1           |
| 75  | Q9H6U8-3;A0A087WZ62;AO Alpha-1-2  | -mannosyltransferase ALG9                                                                                       | ALG9                 | CTS/PSB   | ALG9     | not considered/background |                 |                 | 0           |
| 76  | ESRH7;ESRH5;ESRFW7;ESRHQ;ESR      | Eukaryotic translation initiation factor 3 subunit H                                                            | EIF3H                | CTS/PSB   | EIF3H    | not considered/background | -0.000909184    | -0.031677496    | 2           |
| 78  | A04837;A0A087WZN1;A0A087X0C5;Y7   | Isocitrate dehydrogenase [NAD] subunit beta, mitochondrial;isocitrate dehydrogenase [NAD] subunit               | IDH3B                | CTS/PSB   | IDH3B    | not considered/background | 0.292428393     | 0.256821133     | 2           |
| 79  | D6RRU4;Q43314-2;Q43314-3;A0A087   | W Inositol hexakisphosphate and diphosphoinositol-pentakisphosphate kinase 2;Inositol hexakisphosphate kinase 2 | PIPK5K1              | CTS/PSB   | PIPK5K2  | not considered/background |                 |                 | 0           |
| 80  | Q9HY66;J3KFP9;A0A087WV11;E9PFI6   | Protein kinase KIF3A;Kinesin-like protein                                                                       | KIF3A                | CTS/PSB   | KIF3A    | not considered/background |                 |                 | 0           |
| 82  | Q11015-3;A0A087WV02;Q11015-4;Q0   | Protein SET;Protein SETBP                                                                                       | SETBP1               | CTS/PSB   | SETBP1   | not considered/background |                 |                 | 0           |
| 83  | B4DIB3;Q9P0L2;A0A087X0I6;Q9P0L2   | Serine/threonine-protein kinase MARK1                                                                           | MARK1                | CTS/PSB   | MARK1    | not considered/background |                 |                 | 0           |
| 84  | Q15070-2;Q15070;A0A087X0L7;J3K    | N Mitochondrial inner membrane protein OXA1L                                                                    | OXA1L                | CTS/PSB   | OXA1L    | not considered/background | 0.606157925     | 0.470288977     | 2           |
| 85  | A0A087X0M8;Q00533-2;Q00533-2;H7C  | Neural cell adhesion molecule L1-like protein;Processed neural cell adhesion molecule L1-like pr                | CHL1                 | CTS/PSB   | CHL1     | not considered/background | -0.367489804    | 0.010454043     | 2           |
| 86  | A0A087X0Q1;Q17239;A0A087X0C3;S5   | YTH domain-containing family protein 3;YTH domain-containing family protein 3;YTH domain-co                     | YTHDF3               | CTS/PSB   | YTHDF3   | not considered/background |                 |                 | 0           |
| 87  | Q9UMY4-3;Q9UMY4-1;A0A087X0R6;Q9   | Sorting nexin-12                                                                                                | SNX12                | CTS/PSB   | SNX12    | not considered/background | -0.050173756    | -0.354113592    | 2           |
| 88  | A0A087X0S5;P12109                 | Collagen alpha-1(VI) chain                                                                                      | COL6A1               | CTS/PSB   | COL6A1   | not considered/background | 0.158724496     | 0.051324404     | 2           |
| 89  | A0A087X0U5;P43006-2;P43006-2;E7E  | Excitatory amino acid transporter 1;Excitatory amino acid transporter 4                                         | SLC1A6               | CTS/PSB   | SLC1A6   | not considered/background |                 |                 | 0           |
| 90  | MOQV07;MDR0N3;MOR019;MOR270       | Heterogeneous nuclear ribonucleoprotein M                                                                       | HNRNPM               | CTS/PSB   | HNRNPM   | not considered/background |                 |                 | 0           |
| 91  | Q15155;A0A0G2JN29;A0A087X117;A    | Nodal modulator 1                                                                                               | NOMO1                | CTS/PSB   | NOMO1    | not considered/background | -0.042739126    | 0.084716222     | 2           |
| 92  | Q9C0H9;A0A087X165;A0A087WVW7;S    | RRC kinase signaling inhibitor 1                                                                                | SRCN1                | CTS/PSB   | SRCN1    | not considered/background | -0.283369001    | -0.244278199    | 2           |
| 93  | A0A087X1A5;Q5JW30;Q5JW30-2;Q5J    | Double-stranded RNA-binding protein Staufen homolog 1                                                           | STAU1                | CTS/PSB   | STAU1    | not considered/background |                 | -0.460270761    | 1           |
| 94  | P53365-2;P53365-3;P53365;A0A087   | Arfapin-2                                                                                                       | ARFIP2               | CTS/PSB   | ARFIP2   | not considered/background |                 | 0.044419367     | 1           |
| 95  | A0A087X1G1;H7B900;Q18718-2;Q18    | NADH dehydrogenase [ubiquinone] 1 alpha subcomplex subunit 5                                                    | NDUFA5               | CTS/PSB   | NDUFA5   | not considered/background | 0.268793675     | 0.0497257       | 2           |
| 96  | A0A087X1G7;Q0961-3;Q0961-3;Q0961  | 35S ribosomal protein L15;35S ribosomal protein L15                                                             | MRPL15               | CTS/PSB   | MRPL15   | not considered/background |                 |                 | 0           |
| 97  | A0A087X1K9;ESRGR0;Q75608-2;Q75    | Acyl-protein thioesterase 1                                                                                     | LVPLA1               | CTS/PSB   | LVPLA1   | not considered/background | 0.138945498     | 0.142576291     | 2           |
| 99  | A0A087X1W8;A0A0A0MTI8;Q8B67-5     | Cell adhesion molecule 1                                                                                        | CADM1                | CTS/PSB   | CADM1    | not considered/background | -0.225092787    | 0.013596347     | 2           |
| 100 | HOYM70;Q9UL46;A0A087X1Z3;HOYKU    | Proteasome activator complex subunit 2                                                                          | PSME2                | CTS/PSB   | PSME2    | not considered/background | -0.17193716     | 0.261776924     | 2           |
| 101 | F1T083;A0A087X2G1;Q92499;Q9249    | ATP-dependent RNA helicase DDX1                                                                                 | DDX1                 | CTS/PSB   | DDX1     | not considered/background | 0.049099522     | 0.210513552     | 2           |
| 102 | P62333;A0A087X211;HOYV01;Q8H25    | 26S proteasome regulatory subunit 10B                                                                           | PSMC6                | CTS/PSB   | PSMC6    | not considered/background | -0.12280303     | 0.691732333     | 2           |
| 103 | A0A096LYN5;ADA1B0GT69;ADA1B0G     | Adenylosuccinate lyase                                                                                          | ADSL                 | CTS/PSB   | ADSL     | not considered/background |                 |                 | 0           |
| 104 | Q1CFE1;Q13098-7;A0K070;Q13098     | Adenylosuccinate lyase                                                                                          | GPS1                 | CTS/PSB   | GPS1     | not considered/background | -0.065777918    |                 | 0           |
| 106 | P0DP12;A0A084J2D5;A0A096J16;A0J   | Retinol-binding protein 1                                                                                       | C21orf33             | CTS/PSB   | C21orf33 | not considered/background | -0.06449492     | 0.021072224     | 2           |
| 107 | A0A0A0MTB9;HOYAK8;P09455;P0945    | Retinol-binding protein 1                                                                                       | RBP1                 | CTS/PSB   | RBP1     | not considered/background | 0.31741985      | 0.138790982     | 2           |
| 109 | ADA5F2H67;Q96QD4;A0A3B3SL5;A0     | Serine/threonine-protein kinase LMTK3                                                                           | LMTK3                | CTS/PSB   | LMTK3    | not considered/background |                 |                 | 0           |
| 110 | F2Z357;P47736;P47736-2;A0A0A0M    | Rap1 GTPase-activating protein 1                                                                                | RAP1GAP              | CTS/PSB   | RAP1GAP  | not considered/background | 0.262072288     |                 | 1           |
| 114 | Q8BVR5-4;Q8BVR5;A0A0A0MSK4;A0A    | G-protein-signaling modulator 1                                                                                 | GPSM1                | CTS/PSB   | GPSM1    | not considered/background |                 |                 | 0           |
| 115 | A0A0A0MRE1;Q9UP75-2;B4D107;Q9U    | Exocyst complex component 7                                                                                     | EXOCT                | CTS/PSB   | EXOCT    | not considered/background | -0.182000258    | -0.296662968    | 2           |
| 118 | Q9JUN7-2;Q9JUN7-2;A0A087X0M1;G3   | Sorting nexin-6;Sorting nexin-6;N-terminally processed                                                          | SNX6                 | CTS/PSB   | SNX6     | not considered/background |                 | 0.516116031     | 1           |
| 119 | H7Y6F6;Q8NEY1-6;Q8NEY1-6;Q8NEY1   | Neuron navigator 1                                                                                              | NAV1                 | CTS/PSB   | NAV1     | not considered/background |                 |                 | 0           |
| 120 | P22061;P22061-2;A0A3F2YMK8;A0A    | Protein-L-isoaspartate(D-aspartate) O-methyltransferase                                                         | PCMT1                | CTS/PSB   | PCMT1    | not considered/background | 0.100304096     | 0.082835612     | 2           |
| 122 | Q8BZP0-10;Q8BZP0-8;B6VEK4;Q8BZP   | 07 ABL interactor 1                                                                                             | ABI1                 | CTS/PSB   | ABI1     | not considered/background | -0.331971793    | 0.272854998     | 2           |
| 123 | A0A0C4DH75;Q3DX48;Q3DX49;A0A01    | MAGUK p55 subfamily member 2                                                                                    | MPP2                 | CTS/PSB   | MPP2     | not considered/background | -0.225750593    | -0.109159939    | 2           |
| 124 | A0A0A0MRX1;Q12926;Q12926-2;C9I    | ELAV-like protein;ELAV-like protein 2;ELAV-like protein 3;ELAV-like protein 4                                   | ELAVL2;ELAVL3;ELAVL4 | CTS/PSB   | ELAVL2   | not considered/background | 0.207143205     |                 | 1           |
| 125 | A0A0A0MRX2;Q96H76-2;Q96H76        | DRGR domain-containing protein 1                                                                                | DGRGK1               | CTS/PSB   | DGRGK1   | not considered/background | -0.250680275    | 0.059825731     | 2           |
| 126 | A0A0A0MSQ9;A0A0C4G4P1;P5151-3     | Evx1 receptor                                                                                                   | PVR                  | CTS/PSB   | PVR      | not considered/background | 0.095641454     | 0.052580703     | 2           |
| 127 | Q16836;A0A0A0MSF2;A0A0A0MSF2;Q    | Hydroxacyl-coenzyme A dehydrogenase, mitochondrial                                                              | HADH                 | CTS/PSB   | HADH     | not considered/background | 0.223099979     | 0.255391092     | 2           |
| 128 | F8W988;Q00471;A0A0A0MS18          | Exocyst complex component 5                                                                                     | EXOCS                | CTS/PSB   | EXOCS    | not considered/background | -0.474532437    |                 | 1           |
| 129 | Q6P1N7;Q15533-2;Q15533;A0A0G2J    | Tapasin                                                                                                         | TAPB8                | CTS/PSB   | TAPB8    | not considered/background |                 |                 | 0           |
| 130 | P48739;A0A0A0MSW4;P48739-2;P48    | Phosphatidylinositol transfer protein beta isoform                                                              | PITPNB               | CTS/PSB   | PITPNB   | not considered/background |                 |                 | 0           |
| 131 | Q08345-5;Q08345-6;Q08345-         |                                                                                                                 |                      |           |          |                           |                 |                 |             |

|     |                                  |                                                                                                                        |                 |          |            |                           |              |              |   |
|-----|----------------------------------|------------------------------------------------------------------------------------------------------------------------|-----------------|----------|------------|---------------------------|--------------|--------------|---|
| 182 | A0A0D9SGK2;Q93096;Q12974-3;Q121  | Protein tyrosine phosphatase type IVA 1;Protein tyrosine phosphatase type IVA 2                                        | PTP4A1;PTP4A2   | CTSD/PBS | PTP4A1     | not considered/background |              |              | 0 |
| 183 | P0DMV8;A0A0G2JW1;P0DH            | Heat shock 70 kDa protein 18;Heat shock 70 kDa protein 1A                                                              | HSPA1B;HSPA1A   | CTSD/PBS | HSPA1B     | not considered/background | 0,175939705  | 0,215211275  | 2 |
| 184 | O95870;A0A0G2JJD3;O95870-2;A0A0  | Abhydrolase domain-containing protein 16A                                                                              | ABHD16A         | CTSD/PBS | ABHD16A    | not considered/background | 0,123701332  |              | 2 |
| 185 | Q0UB55-5;A0A1A07443;Q0UB55-5;Q9  | Gamma-aminobutyric acid type B receptor subunit 2                                                                      | GABBR1          | CTSD/PBS | GABBR1     | not considered/background |              |              | 0 |
| 186 | P0A062-4;A0A0G2JNZ5;P0A062-2;P0A | Glucosylceramidase                                                                                                     | GBA             | CTSD/PBS | GBA        | Lysosomal enzymes         | -0,23048213  | -0,07299756  | 2 |
| 188 | A0A0G2JQ41;Q12979-4;Q12979-2;Q1  | Active breakpoint cluster region-related protein                                                                       | ABR             | CTSD/PBS | ABR        | not considered/background |              | -0,008343459 | 1 |
| 191 | E9PLH9;E9PP14;A0A0J9YX13;E9PKL9; | GDP-L-fucose synthase                                                                                                  | TSTA3           | CTSD/PBS | TSTA3      | not considered/background |              |              | 0 |
| 192 | C9J2C4;Q75190-2;Q75190-3;Q75190  | DnaI homolog subfamily B member 6                                                                                      | DNAI86          | CTSD/PBS | DNAI86     | not considered/background |              |              | 0 |
| 193 | A0A0J9YX10;Q95319-5;A0A1B0G1UH;  | CUGBP Elav-like family member 2;CUGBP Elav-like family member 1                                                        | CELF1;CELF2     | CTSD/PBS | CELF2      | not considered/background |              |              | 0 |
| 194 | Q15165-3;Q15165-1;Q15165;A0A0J9  | Serum paraoxonase/arylesterase 2                                                                                       | PON2            | CTSD/PBS | PON2       | not considered/background | -0,514078619 |              | 1 |
| 195 | A0A0J9YH79                       |                                                                                                                        | PACSIN2         | CTSD/PBS | A0A0J9YH79 | not considered/background | -0,28221315  |              | 0 |
| 199 | Q9UL81-3;E7ERL8;A0A0J58RMU5;Q9U  | Neurexin-1                                                                                                             | NRXN1           | CTSD/PBS | NRXN1      | not considered/background | -0,138489221 | -0,093560176 | 2 |
| 200 | Q9Y4C0-3;Q9Y4C0-4;A0A0U1RRJ0;Q9  | Neurexin-3                                                                                                             | NRXN3           | CTSD/PBS | NRXN3      | not considered/background |              |              | 0 |
| 201 | E3W994;A0A0A1RQI6;E7ERIB;E7EW45  | CLIP-associating protein 2                                                                                             | CLASP2          | CTSD/PBS | CLASP2     | not considered/background | -0,260186453 | 0,04629522   | 2 |
| 202 | F8VC55;Q6P3W7;A0A0A1RQ09         | SCY1-like protein 2                                                                                                    | SCYL2           | CTSD/PBS | SCYL2      | not considered/background |              |              | 0 |
| 203 | A0A0A1RQ78;Q8TC22-6;Q8TC22-3;Q8  | CDB9 antigen-like protein 2                                                                                            | CDB9L2          | CTSD/PBS | CDB9L2     | not considered/background | -0,053329910 | -0,083928155 | 2 |
| 205 | E7EPJ2;Q9Y2E4;A0A0U1RQW6;Q9Y2E   | Disco-interacting protein 2 homolog C                                                                                  | DIP2C           | CTSD/PBS | DIP2C      | not considered/background | -0,200431876 |              | 1 |
| 206 | Q9UNF0-2;A0A0U1RR22;Q9UNF0;800   | Protein kinase C and casein kinase substrate in neurons protein 2                                                      | PKCIN2          | CTSD/PBS | PKCIN2     | not considered/background |              | -0,046840254 | 0 |
| 207 | P0A080;Q9AKK5;Q99878;Q147777;Q9  | Histone H2A type 1-8;Histone H2A type 1-H;Histone H2A type 1-J;Histone H2A type 2-C;Histone H2A1H2AH;HIST1H2           | HIST1H2AB       | CTSD/PBS | HIST1H2AB  | not considered/background |              |              | 0 |
| 208 | G5E919;A0A0A1RR70;Q8NS68-2;Q8N   | Serine/threonine-protein kinase DCLK2                                                                                  | DCLK2           | CTSD/PBS | DCLK2      | not considered/background |              |              | 0 |
| 209 | Q9Y2D4;A0A0A1RR86;Q9Y2D4-2;J3Q1  | Exocyst complex component 68                                                                                           | EXOC68          | CTSD/PBS | EXOC68     | not considered/background | -0,304023998 |              | 1 |
| 212 | Q8N350;A0A140LJL2;Q8N350-4;K7EL  | Protein Dos                                                                                                            | DOS             | CTSD/PBS | DOS        | not considered/background | -0,09508051  | 0,142353351  | 2 |
| 213 | Q0P5T2;A0A140T9G8;Q5SQH8-4;Q5SQ  | Uncharacterized protein C6orf136                                                                                       | C6orf136        | CTSD/PBS | C6orf136   | not considered/background | 0,179256247  | 0,255614981  | 2 |
| 214 | A0A140T9W4;A0A140T9R1;Q75955-2   | Flotillin-1                                                                                                            | FLOT1           | CTSD/PBS | FLOT1      | not considered/background | 0,156396617  | 0,148720692  | 2 |
| 215 | Q5XKPO;A0A0A1T8B6;C7EBR2;A0A140  | Protein QIL1                                                                                                           | QIL1;C13orf70   | CTSD/PBS | QIL1       | not considered/background |              |              | 0 |
| 216 | A0A2R8Y4D5;A0A2R8Y4D5;A0A2R8Y    | Excitatory amino acid transporter 2;Amino acid transporter                                                             | SLC12A2         | CTSD/PBS | SLC12A2    | not considered/background | 0,080901319  | -0,142348082 | 2 |
| 218 | A0A182DW2;Q9NNW7-2;D3YTF8;A0A    | Thioredoxin reductase 2, mitochondrial                                                                                 | TXRND2          | CTSD/PBS | TXRND2     | not considered/background | 0,354903461  | -0,193582525 | 2 |
| 219 | Q13510-2;E7EMMA;Q13510;A0A1B0G   | Acid ceramidase;Acid ceramidase subunit alpha;Acid ceramidase subunit beta                                             | ASAH1           | CTSD/PBS | ASAH1      | not considered/background | -0,079371317 | -0,107420059 | 2 |
| 218 | Q9UPP5-2;Q9UPP5;E9PEZ5;A0A1B0G1  | Uncharacterized protein KIAA1107                                                                                       | KIAA1107        | CTSD/PBS | KIAA1107   | not considered/background |              |              | 0 |
| 220 | Q7Z456-6;Q7Z456-3;Q7Z456-5;A0A1B | Kinesin-like protein KIF21A                                                                                            | KIF21A          | CTSD/PBS | KIF21A     | not considered/background | -0,524292505 | 0,059858806  | 2 |
| 222 | A0A1B0GV05;A0A1B0GWE8;P07339;C   | Cathepsin D;Cathepsin D light chain;Cathepsin D heavy chain                                                            | CTSD            | CTSD/PBS | CTSD       | Lysosomal enzymes         | 1,297308823  | 1,368513844  | 2 |
| 223 | P28472-7;P28472-3;A0A1B0GVW3;P   | Gamma-aminobutyric acid receptor subunit beta-3;Gamma-aminobutyric acid receptor subunit GABRB3;GABRB3                 | GABRB3          | CTSD/PBS | GABRB3     | not considered/background | 0,012824684  |              | 1 |
| 224 | A0A1B0GVW5                       |                                                                                                                        | GABRG5          | CTSD/PBS | A0A1B0GVW5 | not considered/background | 0,228401172  |              | 0 |
| 225 | O43602-2;A0A1B0GWD1;O43602;A8    | Neuronal migration protein doublecortin                                                                                | DCX             | CTSD/PBS | DCX        | not considered/background | -0,002151219 | -0,089362553 | 2 |
| 226 | A0A1B0GW12;Q75503;A0A087WZ0Y;Q   | Ceroid-lipofuscinosis neuronal protein 5                                                                               | CLN5            | CTSD/PBS | CLN5       | not considered/background | -0,3795825   |              | 1 |
| 227 | Q674X7-5;Q674X7-2;Q674X7;A0A1B   | Kazrin                                                                                                                 | KAZN            | CTSD/PBS | KAZN       | not considered/background | -0,011907962 | -0,118226814 | 2 |
| 228 | F6W5T4;A0A1B0GXE7;Q9P053;Q53FV   | ORM1-like protein 1;ORM1-like protein 2                                                                                | ORMDL1          | CTSD/PBS | ORMDL1     | not considered/background |              |              | 0 |
| 229 | A0A17CVC95;Q8WUG5-2;Q8WUG5;A0    | Solute carrier family 22 member 17                                                                                     | SLC22A17        | CTSD/PBS | SLC22A17   | not considered/background |              | 0,307519237  | 1 |
| 230 | A0A17CVC93;Q16555;Q16555-2;E5R   | Hydropyrimidinease-related protein 2                                                                                   | DIPYSL2         | CTSD/PBS | DIPYSL2    | not considered/background | -0,128077517 | -0,110630508 | 2 |
| 231 | Q9H902-2;Q9H902;A0A2R8Y2A2;A0A   | Receptor for expression-enhancing protein 1;Receptor expression-enhancing protein 2                                    | REEP1           | CTSD/PBS | REEP1      | not considered/background | 0,373063499  | -0,129833392 | 2 |
| 232 | A0A286VEW9;A0A286VE59;P45984-2;  | Mitogen-activated protein kinase 9;Mitogen-activated protein kinase 10;Mitogen-activated protein kinase 9;MAPK10;MAPK8 | MAPK9           | CTSD/PBS | MAPK9      | not considered/background |              |              | 0 |
| 233 | A0A1W2PNP0;A0A1W2PP57;Q9G9N2     | GPI transamidase component PIG-T                                                                                       | PIGT            | CTSD/PBS | PIGT       | not considered/background | -0,243045048 | 0,281666872  | 2 |
| 234 | A0A1W2PNR9;Q9YSU9                | Immediate early response 3-interacting protein 1                                                                       | IER3IP1         | CTSD/PBS | IER3IP1    | not considered/background |              | 0,00433459   | 1 |
| 235 | Q9H300;A0A1W2PP11;F8WCQ4;A0A1    | Presenilin-associated rhomboid-like protein, mitochondrial;P-beta                                                      | PARL            | CTSD/PBS | PARL       | not considered/background |              |              | 0 |
| 236 | A0A1W2PR27;A0A1W2PQ74;A0A1W2     | Heterogeneous nuclear ribonucleoprotein U                                                                              | HNRNPU          | CTSD/PBS | HNRNPU     | not considered/background |              |              | 0 |
| 237 | A0A1W2PH1;P23368;A0A1W2PQ73;N    | AD-dependent malic enzyme, mitochondrial                                                                               | ME2             | CTSD/PBS | ME2        | not considered/background | 0,31254901   | 0,262088308  | 2 |
| 238 | Q75382-2;Q75382-3;A0A1W2PP17;Q7  | Tartrate motif-containing protein 3                                                                                    | TNNB3           | CTSD/PBS | TNNB3      | not considered/background |              | -0,180147861 | 0 |
| 239 | A0A286VEW9;Q9Y282-2;Q9Y282-1;Q9  | Endoplasmic reticulum-Golgi intermediate compartment protein 3                                                         | ERGIC3          | CTSD/PBS | ERGIC3     | not considered/background |              |              | 0 |
| 241 | A0A1W2PQV2;J43BUH5;P23434        | Glycine cleavage system H protein, mitochondrial                                                                       | GCSH            | CTSD/PBS | GCSH       | not considered/background | 0,752491709  |              | 1 |
| 242 | FSGYH1;A0A1W2PRM0;A0A1W2PRL5;    | Adaptin ear-binding coat-associated protein 1                                                                          | NECAP1          | CTSD/PBS | NECAP1     | not considered/background | -0,123292507 | -0,005759269 | 2 |
| 243 | A0A1W2PS43;Q14108;A0A1W2PRS1;    | Lysosome membrane protein 2                                                                                            | SCARB2          | CTSD/PBS | SCARB2     | not considered/background | -0,269477421 | 0,019111901  | 2 |
| 245 | A0A1W2PS24;Q5SRN5;Q5SRN7;P0443   | HLA class I histocompatibility antigen, A-3 alpha chain                                                                | HLA-A           | CTSD/PBS | HLA-A      | not considered/background | 0,175301034  | -0,062536622 | 2 |
| 248 | Q92841-1;Q92841-3;Q92841;A0A1X7  | Probable ATP-dependent RNA helicase DDX17                                                                              | DDX17           | CTSD/PBS | DDX17      | not considered/background | 0,197110515  |              | 1 |
| 250 | A0A286VE72;A0A286VE72;Q43175;A   | 3-phosphoglycerate dehydrogenase                                                                                       | PHGDH           | CTSD/PBS | PHGDH      | not considered/background | -0,217490785 |              | 0 |
| 251 | Q9UK22;A0A286Y377;RAGNH1         | F-box only protein 2                                                                                                   | FBXO2           | CTSD/PBS | FBXO2      | not considered/background |              | 0,048934475  | 2 |
| 252 | A0A2C9FP24;P50897;A0A286YFF7;Q5  | Palmitoyl-protein thioesterase 1                                                                                       | PPT1            | CTSD/PBS | PPT1       | not considered/background | 0,289480386  | 0,165418126  | 2 |
| 253 | Q9HS15-2;E7EVM7;Q9HS15;Q9HS15-4  | Piezo-type mechanosensitive ion channel component 2;Piezo-type mechanosensitive ion channel                            | PIEZO2          | CTSD/PBS | PIEZO2     | not considered/background |              |              | 0 |
| 254 | Q13555-10;Q5SWX3;Q13555-3;Q135   | Calcium/calmodulin-dependent protein kinase type II subunit gamma                                                      | CAMK2G          | CTSD/PBS | CAMK2G     | not considered/background |              |              | 0 |
| 255 | A0A590UKC4;A0A28RY2A8;Q13367-4;  | AP-3 complex subunit beta-2                                                                                            | AP3B2           | CTSD/PBS | AP3B2      | not considered/background | 0,067363367  | -0,379953597 | 2 |
| 256 | A0A28RY3M4;A0A28RY7B8;A0A28RY6   | Paraplegin                                                                                                             | SPG7            | CTSD/PBS | SPG7       | not considered/background |              |              | 0 |
| 257 | A0A28RY61;A0A28RY3N3;P45590-2;   | Probable histidine-tRNA ligase, mitochondrial                                                                          | HARS2           | CTSD/PBS | HARS2      | not considered/background |              | -0,35038409  | 1 |
| 258 | A0A28RY830;P45617;A0A28RY817;P4  | Glutathione synthase                                                                                                   | GSS             | CTSD/PBS | GSS        | not considered/background | 0,025312343  | 0,026410765  | 2 |
| 259 | A6NNM4;A0A28RY478;P21926;G8LH6   | Tetraspanin;CD9 antigen                                                                                                | CD9             | CTSD/PBS | CD9        | not considered/background |              |              | 0 |
| 260 | P56945-4;A0A28RY5E4;P56945-5;A0  | Breast cancer anti-estrogen resistance protein 1                                                                       | BCAR1           | CTSD/PBS | BCAR1      | not considered/background | 0,142740172  | -0,240253262 | 2 |
| 261 | Q9UH03-2;Q9UH03;A0A28RY4H2;B1A   | Neuronal-specific septin-3                                                                                             | SEPT3           | CTSD/PBS | SEPT3      | not considered/background | 0,142740172  | -0,240253262 | 2 |
| 262 | A0A28RYE79;A0A28RYCE9;A0A28RY4   | Beta-mannosidase                                                                                                       | MANBA           | CTSD/PBS | MANBA      | Lysosomal enzymes         | -0,446108722 |              | 1 |
| 263 | Q3V6T2;A0A28RY4X4;Q3V6T2-2;A0A2  | Girdin                                                                                                                 | CDC88A          | CTSD/PBS | CDC88A     | not considered/background |              |              | 0 |
| 264 | H38V07;A0A28RY518;Q9ULP5-2;Q9U   | TBC1 domain family member 24                                                                                           | TBC1D24         | CTSD/PBS | TBC1D24    | not considered/background | 0,038295698  | -0,061707085 | 2 |
| 265 | A0A28RY804;A0A28RY513;A0A28RYC   | Catenin beta-1                                                                                                         | CTNNA3          | CTSD/PBS | CTNNA3     | not considered/background | -0,028395213 | -0,1264443   | 2 |
| 267 | Q9P260;A0A28RY566;Q9P260-2;A0A   | LiH domain and HEAT repeat-containing protein KIAA1468                                                                 | KIAA1468        | CTSD/PBS | KIAA1468   | not considered/background | -0,533743552 |              | 1 |
| 268 | P35241;A0A28RY557;P35241-5;A0A2  | Radixin                                                                                                                | RDX             | CTSD/PBS | RDX        | not considered/background | -0,088162718 | -0,076422275 | 2 |
| 269 | A0A28RY611;Q14617-3;Q14617-4;Q1  | AP-3 complex subunit delta-1                                                                                           | AP3D1           | CTSD/PBS | AP3D1      | not considered/background | -0,572994628 |              | 1 |
| 270 | A0A28RY6J3;P46777;Q5T7ND;A0A28   | 60S ribosomal protein L5                                                                                               | RPL5            | CTSD/PBS | RPL5       | not considered/background | 0,058108649  |              | 1 |
| 271 | A0A28RYDQ9;Q9P287-2;Q9P287;A0A   | Succinyl-CoA ligase [ADP-forming] subunit beta, mitochondrial                                                          | SUCL2A          | CTSD/PBS | SUCL2A     | not considered/background | 0,206396694  | 0,096267552  | 2 |
| 272 | A0A28RY7H4;P60891;B1ALAP;P60891  | Ribose-phosphate pyrophosphokinase 1;Ribose-phosphate pyrophosphokinase 2                                              | PPRPS2          | CTSD/PBS | PPRPS2     | not considered/background | 0,249384659  | 0,024545897  | 2 |
| 273 | A0A28RY874;F54566-2;Q9Y282-2;Q9  | Lipidogenesis homolog domain-containing protein 1                                                                      | LHDH1           | CTSD/PBS | LHDH1      | not considered/background |              |              | 0 |
| 274 | P62263;A0A28RY811;E5RH77         | 40S ribosomal protein S14                                                                                              | RPS14           | CTSD/PBS | RPS14      | not considered/background | 0,10353121   | -0,458382004 | 2 |
| 275 | P15056;H7C560;A0A2U3T2I2;A0A2R   | Serine/threonine-protein kinase B-raf;Serine/threonine-protein kinase A-raf                                            | BRAF;ARAF       | CTSD/PBS | BRAF       | not considered/background |              |              | 0 |
| 276 | P68400;E7EUP6;A0A28RYD58;A0A2R   | Kinase II subunit alpha;Casein kinase II subunit alpha 3                                                               | CSNK2A1;CSNK2A3 | CTSD/PBS | CSNK2A1    | not considered/background | -0,204648635 | -0,114766793 | 2 |
| 277 | A0A28RYE10;Q9NRW7;A0A28RYD95;P   | Vacuolar protein sorting-associated protein 45                                                                         | VPS45           | CTSD/PBS | VPS45      | not considered/background | -0,073924652 | -0,04270219  | 2 |
| 278 | P30531;A0A28RYD05;A0A28RYE0F;A0  | Sodium- and chloride-dependent GABA transporter 1;Transporter                                                          | SLC6A1          | CTSD/PBS | SLC6A1     | not considered/background |              |              | 0 |
| 279 | Q9H267-2;F5H080;A0A28RYD00;Q9H   | Vacuolar protein sorting-associated protein 33B                                                                        | VPS33B          | CTSD/PBS | VPS33B     | not considered/background |              |              | 0 |
| 280 | A0A2U3T2M4;Q14616-3;Q14616-4;Q1  | Peripheral plasma membrane protein CASK                                                                                | CASK            | CTSD/PBS | CASK       | not considered/background | -0,292663973 |              | 0 |
| 283 | Q14155-2;Q14155-3;Q14155-3;A0A2  | Rho guanine nucleotide exchange factor 7                                                                               | ARHGEF7         | CTSD/PBS | ARHGEF7    | not considered/background | -0,060954006 | -0,928048109 | 2 |
| 284 | Q14773-2;A0A28RYG01;Q14773;A0A   | Tripeptidyl-peptidase 1                                                                                                | TPP1            | CTSD/PBS | TPP1       | not considered/background | -0,328438474 | -0,535754381 | 2 |
| 285 | A0A28RYGH5;P61966;H7C1E4;P6196   | AP-1 complex subunit sigma-1A                                                                                          | AP1S1           | CTSD/PBS | AP1S1      | not considered/background | -0,225818077 |              | 1 |
| 286 | Q05639;A0A2U3T2H3;A0A28RY488;A   | Elongation factor 1-isoalpha 2                                                                                         | EEF1A2          | CTSD/PBS | EEF1A2     | not considered/background | -0,280124407 | -0,118413684 | 2 |
| 287 | P11171;A0A2U3T2H6;P11171-2;P111  | Protein 4.1                                                                                                            | EPB41           | CTSD/PBS | EPB41      | not considered/background | 0,15393501   | 0,29436706   | 2 |
| 288 | E9PNW4;A0A2U3T2L5;P13987;P1398   | CD59 glycoprotein                                                                                                      | CD59            | CTSD/PBS | CD59       | not considered/background | 0,049351959  | -0,268075023 | 2 |
| 289 | P06744;A0A2U3T2U2;P06744-2;P2Y   | G6-phosphate isomerase                                                                                                 | GPI             | CTSD/PBS | GPI        | not considered/background | -0,074258771 | -0,112678557 | 2 |
| 290 | A0A2Y9D025;P55656-2;Q9Y282-2;Q9  | NADH dehydrogenase [ubiquinone] 1 alpha subcomplex subunit 6                                                           | NDFUAF6         | CTSD/PBS | NDFUAF6    | not considered/background | -0,159934764 | 0,159934744  | 0 |
| 291 | Q9Y175-5;Q9Y175-2;A0A38ADWU0;Q   | Neurotrophin target esterase                                                                                           | PNPLA6          | CTSD/PBS | PNPLA6     | not considered/background |              |              | 0 |
| 292 | V9GYQ3;P11586;A0A384N5Y3;F5H2F   | C-1-tetrahydrofolate synthase, cytoplasmic;Methylenetetrahydrofolate dehydrogenase;Metheny                             | MTHFD1          | CTSD/PBS | MTHFD1     | not considered/background |              | -0,10272531  | 1 |
| 293 | A0A3B3IRI2;P17812;B4E1E0;A0A3B3I | CTP synthase 1;CTP synthase                                                                                            | CTPS1           | CTSD/PBS | CTPS1      | not considered/background | -0,30900192  | -0,094776557 | 2 |
| 294 | C9J3L8;C9J5W0;P43307;A0A3B3I0R8  | Translocan-associated protein subunit alpha                                                                            | SSR1            | CTSD/PBS | SSR1       | not considered/background | 0,227741076  | 0,234002335  | 2 |
| 295 | A0A3B3IRU7;Q9Y233-2;Q9Y233-2;A0  | cAMP and cAMP-inhibited GMP 3,5-cyclic phosphodiesterase 10A                                                           | PDE10A          | CTSD/PBS | PDE10A     | not considered/background | -0,152131339 | 0,000750397  | 2 |
| 296 | P54762;A0A3B3IR6;P54762-3;P2931  | Ephrin type B receptor 1                                                                                               | EPHB1           | CTSD/PBS | EPHB1      | not considered/background |              | -0,354000719 | 0 |
| 297 | Q15079;A0A3B3IR9;Q15079-2;B3KH   | Syntaxin-5 syntaxin                                                                                                    | SNPH            | CTSD/PBS | SNPH       | not considered/background |              |              | 0 |
| 298 | A0A3B3I001;A0A3B3I01;A0A3B3I0K   | Aspartate-tRNA ligase, mitochondrial                                                                                   | DARS2           | CTSD/PBS | DARS2      | not considered/background |              |              | 0 |
| 299 | P78352-2;B72647;B9EGL1;A0A3B3IS  |                                                                                                                        |                 |          |            |                           |              |              |   |

|     |                                                                                                                                                                                                                  |                          |          |          |                           |              |              |   |
|-----|------------------------------------------------------------------------------------------------------------------------------------------------------------------------------------------------------------------|--------------------------|----------|----------|---------------------------|--------------|--------------|---|
| 362 | AOA6I8PIW1;O43301;AOA6I8PIT5;AOA Heat shock 70 kDa protein 12A                                                                                                                                                   | HSPA12A                  | CTSD/PBS | HSPA12A  | not considered/background | -0,141398282 | -0,152118504 | 2 |
| 363 | AOA6I8PR8;AOA6I8PL17;Q16827-2;Receptor type tyrosine-protein phosphatase O                                                                                                                                       | PTPRO                    | CTSD/PBS | PTPRO    | not considered/background | 0,096396804  | -0,075737982 | 0 |
| 365 | O95490-3;O95490-5;AOA6I8PIU0;O95 Latrophilin-2                                                                                                                                                                   | LPHN2;ADGRL2             | CTSD/PBS | LPHN2    | not considered/background |              | 0,118445006  | 1 |
| 366 | KTER41;O9915-1;AOA6I8PIU4;AOA6I8 Dnai monomer subfamily C member 7                                                                                                                                               | DNAC17                   | CTSD/PBS | DNAC17   | not considered/background |              |              | 0 |
| 367 | AOA6I8PTT9;Q06210-2;Q06210;AOA6I Glutamine-fructose-6-phosphate aminotransferase [somerizing] 1                                                                                                                  | GFPT1                    | CTSD/PBS | GFPT1    | not considered/background |              |              | 0 |
| 368 | Q08379-2;AOA6Q8KRQ2;Q08379;AOA Golgin subfamily A member 2                                                                                                                                                       | GOLGA2                   | CTSD/PBS | GOLGA2   | not considered/background |              |              | 0 |
| 369 | C9J6R3;Q9BYV8-5;Q9BYV8-2;AOA6Q8F Centrosomal protein of 41 kDa                                                                                                                                                   | CEP41                    | CTSD/PBS | CEP41    | not considered/background |              |              | 1 |
| 370 | AOA6Q8PHG4;AOA6Q8FPX3;AOA6Q8F Tripartite motif-containing protein 2                                                                                                                                              | TRIM2                    | CTSD/PBS | TRIM2    | not considered/background | -0,415864882 | -0,247076832 | 2 |
| 372 | AOA6Q8PEZ7;AOA6Q8PG75;Q95666;Al Chloride channel CLIC-like protein 1                                                                                                                                             | CLCC1                    | CTSD/PBS | CLCC1    | not considered/background | 0,179001399  |              | 1 |
| 373 | Q96DH6-2;B4DHF8;Q96DH6;AOA6Q8F RNA-binding protein Musashi homolog 2                                                                                                                                             | MSI2                     | CTSD/PBS | MSI2     | not considered/background |              |              | 0 |
| 374 | AOA6Q8HU0;AOA6Q8FV3;F8VU42-5;C Charged multivesicular body protein 1a                                                                                                                                            | CHMP1A                   | CTSD/PBS | CHMP1A   | not considered/background |              |              | 0 |
| 375 | AOA6Q8FA6;O00139;AOA6Q8PHF57;C Kinesin-like protein KIF2A                                                                                                                                                        | KIF2A                    | CTSD/PBS | KIF2A    | not considered/background | -0,12834557  | 0,032919949  | 1 |
| 376 | AOA6Q8PFC2;Q9UNW9;F8YVY3 RNA-binding protein Nova-2                                                                                                                                                              | NOVA2                    | CTSD/PBS | NOVA2    | not considered/background | -0,10285253  |              | 2 |
| 378 | O95140;AOA6Q8PF14;AOA6Q8PGS9;A Mitofusin-2                                                                                                                                                                       | MFN2                     | CTSD/PBS | MFN2     | not considered/background | 0,216113358  | 0,207577729  | 2 |
| 379 | AOA6Q8PFK8;P04792;AOA6Q8PGK1;A Heat shock protein beta-1                                                                                                                                                         | HSPB1                    | CTSD/PBS | HSPB1    | not considered/background | -0,431481402 | -0,479541007 | 2 |
| 380 | AOA6Q8PFU2;Q9UP58-2;E7E5J3;Q9UP Ankyrin repeat domain-containing protein 26;Ankyrin repeat domain-containing protein 62;Coi                                                                                      | ANKRD26;ANKRD62;CCDC144A | CTSD/PBS | ANKRD26  | not considered/background | -0,119121292 |              | 1 |
| 381 | Q92734-2;Q92734;AOA6Q8PF77;AOA6 Protein TFG                                                                                                                                                                      | TFG                      | CTSD/PBS | TFG      | not considered/background | 0,00273852   | 0,015592935  | 2 |
| 382 | Q96PU5-3;AOA6Q8PG5-1;AOA6Q8PUS-5;C Ubiquitin-protein ligase NEDD4-like                                                                                                                                           | NEDD4L                   | CTSD/PBS | NEDD4L   | not considered/background | 0,30569923   | 0,06274923   | 2 |
| 384 | AOA6Q8G52;AOA6Q8PGL3;Q9T836-6;Ganglioside-induced differentiation-associated protein 1                                                                                                                           | GDAP1                    | CTSD/PBS | GDAP1    | not considered/background | -0,351295728 | -0,023893088 | 2 |
| 385 | E7ETE7;P12081-3;P12081;P12081-4;H Histidine-tRNA ligase, cytoplasmic                                                                                                                                             | HARS1                    | CTSD/PBS | HARS     | not considered/background | 0,035342381  | 0,124660282  | 2 |
| 386 | Q5IUV4;AOA6Q8PH85;P49902;AOA6Q Cytosolic purine 5-nucleotidase                                                                                                                                                   | NTS2C                    | CTSD/PBS | NTS2C    | not considered/background |              | -0,6326129   | 1 |
| 387 | P50440-2;AOA6Q8PHC6;P50440;P504 Glycine amidinotransferase, mitochondrial                                                                                                                                        | GATM                     | CTSD/PBS | GATM     | not considered/background | 0,541217448  | -0,363451457 | 2 |
| 388 | AOA7D9N0L9;Q7Z553-3;Q7Z553-3;Q7Z5 MAM domain-containing glycosylphosphatidylinositol anchor protein 2                                                                                                            | MDGA2                    | CTSD/PBS | MDGA2    | not considered/background |              |              | 0 |
| 389 | AOAVT1;AOAVT1-2;HOY5S8 Ubiquitin-like modifier-activating enzyme 6                                                                                                                                               | UBA6                     | CTSD/PBS | UBA6     | not considered/background |              |              | 0 |
| 390 | AOA266-2;AOA266-4;AOA266;AOA266 Shoonit-3                                                                                                                                                                        | KIAA1598                 | CTSD/PBS | KIAA1598 | not considered/background | -0,242464645 | -0,002162421 | 2 |
| 391 | A1AS47;C9JAD2;Q9JAD2-3;A1AS47-2;C Solute carrier family 22 member 23                                                                                                                                             | SLC22A23                 | CTSD/PBS | SLC22A23 | not considered/background | -0,351295728 |              | 2 |
| 392 | A1L070;MOR026;MOQX5;EP9J50;E9P Acetolactate synthase-like protein                                                                                                                                                | ILVBL                    | CTSD/PBS | ILVBL    | not considered/background | -0,048024356 | 0,084410265  | 2 |
| 393 | A1X283;G3V144;AOA180GUZF;HOY50 SH3 and PX domain-containing protein 28;SH3 and PX domain-containing protein 2A                                                                                                   | SH3PXD2B;SH3PXD2A        | CTSD/PBS | SH3PXD2B | not considered/background |              |              | 0 |
| 394 | P04156;A2AZV1;X6KRK53 Major prion protein                                                                                                                                                                        | PRNP                     | CTSD/PBS | PRNP     | Other substrate           | 0,130271955  | -0,054362288 | 2 |
| 395 | A2IDC6;Q13084;A2IDC7;Q4TT37 395 ribosomal protein L28, mitochondrial                                                                                                                                             | MRPL28                   | CTSD/PBS | MRPL28   | not considered/background | 0,616075342  |              | 1 |
| 396 | A2RRP1;A2RRP1-2;HOY5G7;H7BZK3;H Neuroblastoma-amplified sequence                                                                                                                                                 | NBAS                     | CTSD/PBS | NBAS     | not considered/background | 0,012211084  | 0,042664824  | 2 |
| 398 | A3KMH1-2;A3KMH1-3;A3KMH1 von Willibrand factor A domain-containing protein 8                                                                                                                                     | VWAF                     | CTSD/PBS | VWAF     | not considered/background |              |              | 0 |
| 400 | A6NCQ0;A6NIUK9;A6NIUK9;A6NFX8;H0 ADP-sugar pyrophosphatase                                                                                                                                                       | NUDT5                    | CTSD/PBS | NUDT5    | not considered/background | -0,530634946 |              | 1 |
| 402 | A6NDG6;H3BVL7 Phosphoglycolate phosphatase                                                                                                                                                                       | PGP                      | CTSD/PBS | PGP      | not considered/background | 0,156267161  |              | 0 |
| 403 | O95861-4;A6NF51;O95861;O95861-2 3(2),5-bisphosphate nucleotidase 1                                                                                                                                               | BPNT1                    | CTSD/PBS | BPNT1    | not considered/background |              |              | 0 |
| 404 | K7E10;Q969T9-2;K7ENL2;A6NG10;K71 WW domain-binding protein 1                                                                                                                                                     | WBP2                     | CTSD/PBS | WBP2     | not considered/background | 0,125386605  | 0,010497639  | 2 |
| 405 | A6NGN9 IgLON family member 5                                                                                                                                                                                     | IGLON5                   | CTSD/PBS | IGLON5   | not considered/background |              |              | 0 |
| 407 | A6NGW1;O95070;EP9511;EP9J20;C9J Protein YIF1A                                                                                                                                                                    | YIF1A                    | CTSD/PBS | YIF1A    | not considered/background |              |              | 0 |
| 408 | B6FW64;C9J2X8;O95825-2;A6NN08;A Quinone oxidoreductase-like protein 1                                                                                                                                            | CRYZL1                   | CTSD/PBS | CRYZL1   | not considered/background |              |              | 0 |
| 410 | A6NW0;Q2239-2;F2C1L;F9W052-8;B7A GAT5-like                                                                                                                                                                       | GAT5L2                   | CTSD/PBS | GAT5L2   | not considered/background | -0,13035105  | -0,113033665 | 0 |
| 411 | AE6N78;AOA0U1RR2;B5MCE64;AE6N17 Probable methyltransferase-like protein 15                                                                                                                                       | METTL5                   | CTSD/PBS | METTL5   | not considered/background |              |              | 0 |
| 412 | A6NJU2;P54578-2;P54578-3;P54578; Ubiquitin carboxyl-terminal hydrolase;Ubiquitin carboxyl-terminal hydrolase 1A                                                                                                  | USP14                    | CTSD/PBS | USP14    | not considered/background | -0,033968286 | -0,091124334 | 2 |
| 413 | Q16540;A6NU09;A8MV74;A8MYKX;H7 395 ribosomal protein L23, mitochondrial                                                                                                                                          | MRPL23                   | CTSD/PBS | MRPL23   | not considered/background | 0,413702389  |              | 1 |
| 414 | A6NGK5 Retrotransposon-like protein 1                                                                                                                                                                            | RTL1                     | CTSD/PBS | RTL1     | not considered/background | 0,186880881  | 0,315993541  | 2 |
| 416 | EP9JK1;EP9JR8;HOYDL9;HOYDJ9;P600 Tetraspanin;CD81 antigen                                                                                                                                                        | CD81                     | CTSD/PBS | CD81     | not considered/background | -0,044604333 |              | 2 |
| 417 | Q8NF23-2;Q8NF23;Q8NW04;Q8NW04 Neuroigin-4, Y-linked;Neuroigin-4, X-linked                                                                                                                                        | NLGN4Y;NLGN4X            | CTSD/PBS | NLGN4Y   | not considered/background |              |              | 0 |
| 418 | Q15257;F6WNT2;A6GWS5;Q15257-2;C Serine/threonine-protein phosphatase 2A activator                                                                                                                                | PPP2R2A                  | CTSD/PBS | PPP2R2A  | not considered/background | -0,075854496 | -0,037030731 | 0 |
| 419 | A6ZK3;Q9BW05;Q17980 Protein FAM127A;Protein FAM127B;Protein FAM127C                                                                                                                                              | FAM127A;FAM127B;FAM127C  | CTSD/PBS | FAM127A  | not considered/background |              |              | 0 |
| 420 | AT7MB2 DisP2                                                                                                                                                                                                     | DISP2                    | CTSD/PBS | DISP2    | not considered/background |              | 0,267340056  | 1 |
| 422 | ABMRA7;Q5TC12;J3L448;HOYD60;HOY ATP synthase mitochondrial F1 complex assembly factor 1                                                                                                                          | ATPAF1                   | CTSD/PBS | ATPAF1   | not considered/background | -0,243267029 | 0,204665261  | 2 |
| 423 | Q4P980;ABMT37;MOQVW Glycogen synthase kinase-3 alpha                                                                                                                                                             | GSK3A                    | CTSD/PBS | GSK3A    | not considered/background | -0,243267029 |              | 1 |
| 426 | P62750;H7BY10;K7EIV9;K7ERT8;ABM1 60S ribosomal protein L23a                                                                                                                                                      | RPL23A                   | CTSD/PBS | RPL23A   | not considered/background | -0,142464817 |              | 1 |
| 427 | EP9N41;A8MNV6;O14817;J3KQ42;E9 Tetraspanin;Protein-Fanin-4                                                                                                                                                       | TSPAN4                   | CTSD/PBS | TSPAN4   | not considered/background |              |              | 0 |
| 428 | ABMYW0;K7EM64;Q5VUB5 Protein FAM171A2                                                                                                                                                                            | FAM171A2                 | CTSD/PBS | FAM171A2 | not considered/background | -0,047055188 | 0,121627775  | 2 |
| 432 | F2Z2V0;Q98929;R00Z21;B6H0Y24;E7B Copine-1                                                                                                                                                                        | CPNE1                    | CTSD/PBS | CPNE1    | not considered/background |              |              | 0 |
| 435 | P48444;BOYWE6;P48444-2;Q6P105;B Coatomer subunit delta                                                                                                                                                           | ARCN1                    | CTSD/PBS | ARCN1    | not considered/background | -0,007072084 | -0,52947116  | 2 |
| 437 | O14525-3;B1AJ51;O14525-2;O14525 Astroactin-1                                                                                                                                                                     | ASTN1                    | CTSD/PBS | ASTN1    | not considered/background |              |              | 0 |
| 438 | B1AIY5;B1AIY7;Q75832;B1AIY6;Q758 26S proteasome non-ATPase regulatory subunit 10                                                                                                                                 | PSMD10                   | CTSD/PBS | PSMD10   | not considered/background | -0,163477958 | -0,263395035 | 2 |
| 440 | F8WCR2;B1AKV4;B1AKV2;F6U1R7;B1 Ubiquinol-cytochrome-c reductase complex assembly factor 1                                                                                                                        | UQCRC1                   | CTSD/PBS | UQCRC1   | not considered/background |              |              | 0 |
| 441 | P50993;B1AKY9;HOY7C1 Sodium/potassium-transporting ATPase subunit alpha-2                                                                                                                                        | ATP1A2                   | CTSD/PBS | ATP1A2   | not considered/background | -0,910013869 | -0,939828359 | 2 |
| 442 | Q9P077;B1AJM5;Q8NC34-2;B1AJM7;T Transmembrane protein 9                                                                                                                                                          | TMEM9                    | CTSD/PBS | TMEM9    | not considered/background | 0,480582602  | 0,173010255  | 2 |
| 443 | Q14141-2;Q14141-4;B1AJM2;Q14141 Septin-6                                                                                                                                                                         | SEPT6                    | CTSD/PBS | SEPT6    | not considered/background |              |              | 0 |
| 444 | Q16774;B1AHH0;Q16774-2;B1AHH5;I Guanlylate kinase                                                                                                                                                                | GLK1                     | CTSD/PBS | GLK1     | not considered/background | 0,089498151  | 0,200232963  | 2 |
| 446 | B1AP15;H3BLV0;P08174-4;P08174;P Complement decay-accelerating factor                                                                                                                                             | CD55                     | CTSD/PBS | CD55     | not considered/background |              |              | 0 |
| 447 | P07910;P07910-3;G3VQ21;P07910-2 Heterogeneous nuclear ribonucleoproteins C1/C2;Heterogeneous nuclear ribonucleoprotein C-1i                                                                                      | HNRNPC;HNRNPCL4          | CTSD/PBS | HNRNPC   | not considered/background |              | -0,220082261 | 1 |
| 449 | F5HSN2;B4DNC9;B3KQ30;Q9H1K1;Q Iron-sulfur cluster assembly enzyme ISCU, mitochondrial                                                                                                                            | ISCU                     | CTSD/PBS | ISCU     | not considered/background | 0,35614381   | 0,356587074  | 2 |
| 451 | O15382-2;MOQZP4;B3KQ30;O15382;N Branched-chain-amino-acid aminotransferase, mitochondrial;Branched-chain-amino-acid amine                                                                                        | BCAT2                    | CTSD/PBS | BCAT2    | not considered/background | 0,263875733  | 0,134762124  | 2 |
| 453 | O14735-2;O14735;B3KX94;H3BUN9 CDP-diacylglycerol-inositol 3-phosphatidylyltransferase                                                                                                                            | CDIPT                    | CTSD/PBS | CDIPT    | not considered/background |              | 0,340696842  | 1 |
| 454 | P41732;B4DQ64;Q9H1K1;Q9H1K1-2 Tetraspanin-7;Tetraspanin                                                                                                                                                          | TSPAN7                   | CTSD/PBS | TSPAN7   | not considered/background | 0,283566239  | -0,054917919 | 2 |
| 455 | B4D560;Q98R00;Q98R00-2;AOA087W Receptor expression-enhancing protein;Receptor expression-enhancing protein 2                                                                                                     | REEP2                    | CTSD/PBS | REEP2    | not considered/background | 0,109828565  |              | 0 |
| 456 | B4DEM9;Q9Y257 Polymerase delta-interacting protein 2                                                                                                                                                             | POLDIP2                  | CTSD/PBS | POLDIP2  | not considered/background | 0,464250034  | 0,61672426   | 2 |
| 457 | B4DIO3;K7E1Q7;Q9B950;AOA0A0MR0 Signal peptidase complex catalytic subunit SEC11;Signal peptidase complex catalytic subunit SEC11C                                                                                | SEC11C;SEC11C            | CTSD/PBS | SEC11C   | not considered/background |              |              | 0 |
| 458 | O75390;B4DJV2;AOA0C4DG3;HOYIC4 Citrate synthase, mitochondrial;Citrate synthase                                                                                                                                  | CS                       | CTSD/PBS | CS       | not considered/background | 0,29207495   | 0,227134651  | 2 |
| 459 | B4DKF8;Q9NYM0-3;AOA087X120;AOA087PH and SEC17 domain-containing protein 3                                                                                                                                        | PSD3                     | CTSD/PBS | PSD3     | not considered/background | 0,170181458  | 0,513131199  | 2 |
| 460 | P49589-8;B4DKY1;P49589;P49589-3;Cysteine-tRNA ligase, cytoplasmic                                                                                                                                                | CARS                     | CTSD/PBS | CARS     | not considered/background | 0,001441474  | 0,018980333  | 2 |
| 461 | B4DLN1;P52815 Protein FAM143A                                                                                                                                                                                    | FAM143A                  | CTSD/PBS | FAM143A  | not considered/background | 0,503857533  |              | 0 |
| 463 | B4DR12;D60291-4;D60291-3;O60291-3 E3 ubiquitin-protein ligase MGRN1                                                                                                                                              | MGRN1                    | CTSD/PBS | MGRN1    | not considered/background |              | 0,127730701  | 1 |
| 464 | P61619;B4DR61;P61619-3;H7C109;C Protein transport protein SecE1 subunit alpha isoform 1                                                                                                                          | SEC61A1                  | CTSD/PBS | SEC61A1  | not considered/background | -0,120086471 | -0,042224074 | 2 |
| 466 | B4DSN5;P18031 Tyrosine-protein phosphatase non-receptor type;Tyrosine-protein phosphatase non-receptor typ                                                                                                       | PTPN1                    | CTSD/PBS | PTPN1    | not considered/background |              | 0,446226655  | 1 |
| 468 | B4DY09;Q12905;X6R6Z1;AOA0A0MRL Interleukin enhancer-binding factor 2                                                                                                                                             | ILF2                     | CTSD/PBS | ILF2     | not considered/background |              |              | 0 |
| 469 | B4E072;F5H432;F5GXG3;F5H205;F5H1 Peroxisomal targeting signal 1 receptor                                                                                                                                         | PEX5                     | CTSD/PBS | PEX5     | not considered/background |              |              | 0 |
| 470 | B9194-2;Q8T803-4;H0Y9V7;P9B194; Calcium-transporting ATPase type 2 C member 1;Calcium-transporting ATPase                                                                                                        | ATP2C1                   | CTSD/PBS | ATP2C1   | not considered/background | 0,426103701  |              | 1 |
| 471 | Q9HC35-2;Q9HC35;Q9HC35-3;P23411-6 E3 ubiquitin-protein ligase                                                                                                                                                    | EMR4                     | CTSD/PBS | EMR4     | not considered/background | -0,244548354 |              | 0 |
| 472 | B5MCK3;B5MCKF9;B9210;E7X1L8;F8 Protein Npx17                                                                                                                                                                     | MPV17                    | CTSD/PBS | MPV17    | not considered/background |              |              | 0 |
| 473 | B5MCK4;P16422;C9JIKY3 Epithelial cell adhesion molecule                                                                                                                                                          | EPCAM                    | CTSD/PBS | EPCAM    | not considered/background |              |              | 0 |
| 474 | Q15700-5;B5MCK5;Q15700-3;F8YVC1 Disks large homolog 2                                                                                                                                                            | DLG2                     | CTSD/PBS | DLG2     | not considered/background |              |              | 0 |
| 475 | B5MCK7;Q43759-2;Q43759;A2A283;J Synaptogyrin-1                                                                                                                                                                   | SYNGR1                   | CTSD/PBS | SYNGR1   | not considered/background | -0,138584507 | -0,344260395 | 2 |
| 476 | Q8NH99-3;B5MCK0;Q8NH99-5;Q8NH Atlastin-2                                                                                                                                                                         | ATL2                     | CTSD/PBS | ATL2     | not considered/background | 0,379953597  | 0,110183834  | 2 |
| 478 | P62826;B5MDF5;J3KQE5;F5H018;H0Y GTP-binding nuclear protein Ran                                                                                                                                                  | RAN                      | CTSD/PBS | RAN      | not considered/background | 0,143001506  | -0,009341772 | 2 |
| 479 | O5T803-3;Q8T803-2;B7Z7K7;Q8T803 Acyl-CoA-binding domain-containing protein 5                                                                                                                                     | ACBD5                    | CTSD/PBS | ACBD5    | not considered/background | 0,214622201  |              | 0 |
| 480 | B7ZU12;Q62M47-3;Q62M47-5;Q62M47-1 Protein TGM12                                                                                                                                                                  | TGM12L                   | CTSD/PBS | TGM12L   | not considered/background |              |              | 0 |
| 481 | Q96M96-2;F8W1R0;Q96M96;B7Z493; FYVE, RhoGEF and PH domain-containing protein 4                                                                                                                                   | FGD4                     | CTSD/PBS | FGD4     | not considered/background |              |              | 0 |
| 482 | B8ZK47;H7C2W9;C9JUS6;B7Z4E3;P62 60S ribosomal protein L31                                                                                                                                                        | RPL31                    | CTSD/PBS | RPL31    | not considered/background |              |              | 0 |
| 483 | F5GZ08;B7Z4G8;P51693-3;P51693-2;K7 Amyloid-like protein 1;C30                                                                                                                                                    | APLP1                    | CTSD/PBS | APLP1    | not considered/background | -0,490496699 | 0,280877905  | 2 |
| 486 | F8W1R7;P60660-2;P60660;J3KND3;G Myosin light polypeptide 6;Myosin light chain 6B                                                                                                                                 | MYL6;MYL6B               | CTSD/PBS | MYL6     | not considered/background | 0,178873958  | -0,188525727 | 2 |
| 487 | P62495-2;B7ZP88;P62495 Eukaryotic peptide chain release factor subunit 1                                                                                                                                         | ETF1                     | CTSD/PBS | ETF1     | not considered/background |              |              | 0 |
| 489 | P55209;F8VY59;H0YV4;F5H486;F8W Nucleosome assembly protein 1-like 1                                                                                                                                              | NAP1L1                   | CTSD/PBS | NAP1L1   | not considered/background | -0,062504943 | -0,04504943  | 2 |
| 490 | B7Z91;P11310;P11310-2;Q5T4U9;E9 Medium-chain specific acyl-CoA dehydrogenase, mitochondrial                                                                                                                      | ACADM                    | CTSD/PBS | ACADM    | not considered/background | 0,082807748  | -0,192572941 | 2 |
| 491 | Q9NR46;B7ZC38;Q9NR46-2;B7ZC39;F Endophilin-8                                                                                                                                                                     | SH3GLB2                  | CTSD/PBS | SH3GLB2  | not considered/background | -0,124565911 | 0,014572345  | 2 |
| 492 | F8W9W0;F8VP57;P54756-2;B7ZK79; Receptor protein-tyrosine kinase;Ephrin type-A-receptor 5                                                                                                                         | EPHA5                    | CTSD/PBS | EPHA5    | not considered/background | 0,130271955  | -0,092342769 | 2 |
| 494 | Q5V782;B7ZM79;Q9HC56-2;Q9HC56 Protocadherin-9                                                                                                                                                                    | PCDH9                    | CTSD/PBS | PCDH9    | not considered/background | -0,182147567 |              | 1 |
| 497 | B7ZM87;Q75044;AOA07587B5;P0DM SLIT-ROBO Rho GTPase-activating protein 2;SLIT-ROBO Rho GTPase-activating protein 2B;SLIT-ROBO Rho GTPase-activating protein 2B;SLIT-ROBO Rho GTPase-activating protein 2B;SRGAP2C | SRGAP2;SRGAP2B;SRGAP2C   | CTSD/PBS | SRGAP2   | not considered/background | -0,27912619  | -0,209515751 | 2 |
| 498 | B8ZG21;Q9NZW5;C9J4Q3;C9JG8B;REV MAGUK p55 subfamily member 6                                                                                                                                                     | MPPE                     | CTSD/PBS | MPPE     | not considered/background | -0,034848612 | -0,799570462 | 2 |
| 497 | B8ZK25;C9J522;Q43924 Retinal rod rhodopsin-sensitive cGMP 3,5-cyclic phosphodiesterase subunit delta                                                                                                             | PDE6D                    | CTSD/PBS | PDE6D    | not considered/background |              |              | 0 |
| 498 | B8ZK25;Q8TC33-3;Q8TC33-2 395 ribosomal protein L30, mitochondrial                                                                                                                                                | MRPL30                   | CTSD/PBS | MRPL30   | not considered/background |              |              | 0 |
| 503 | P41247;Q9ZT6;P41                                                                                                                                                                                                 |                          |          |          |                           |              |              |   |

|     |                                                                                                    |                                                                                                        |                         |          |          |                           |              |              |
|-----|----------------------------------------------------------------------------------------------------|--------------------------------------------------------------------------------------------------------|-------------------------|----------|----------|---------------------------|--------------|--------------|
| 577 | D3YTB1;P62910;F8W727                                                                               | 60S ribosomal protein L32                                                                              | RPL32                   | CTS0/PBS | RPL32    | not considered/background |              | 0            |
| 578 | Q13557-8;Q13557-12;Q13557-10;D61 Calcium/calmodulin-dependent protein kinase type II subunit delta |                                                                                                        | CAMK2D                  | CTS0/PBS | CAMK2D   | not considered/background | 0,071488106  | -0,166458372 |
| 579 | D68P93;D68R10;D99729-3;D68R20;C Heterogeneous nuclear ribonucleoprotein A/B                        |                                                                                                        | HNRNPAB                 | CTS0/PBS | HNRNPAB  | not considered/background |              | 2            |
| 580 | Q06G26;Q06G26-2;Q06G26-2;Q06G26-2                                                                  | SLC41A3 family A1 member 3                                                                             | SLC41A3                 | CTS0/PBS | SLC41A3  | not considered/background | 0,217851097  |              |
| 581 | P57088;D6RAA6;H0Y8N0                                                                               | Transmembrane protein 33                                                                               | TMEM33                  | CTS0/PBS | TMEM33   | not considered/background | -0,242874317 | -0,123931008 |
| 583 | D6RAN8;Q9P0M9;H7CSU8                                                                               | 39S ribosomal protein L27, mitochondrial                                                               | MRPL27                  | CTS0/PBS | MRPL27   | not considered/background |              | 0,508177681  |
| 584 | Q9B778;D6RAX7;Q9B778-2;D6RFN0;COP9 signalosome complex subunit 4                                   |                                                                                                        | COP54                   | CTS0/PBS | COP54    | not considered/background | -0,131771557 | -0,102456577 |
| 585 | D6R881;Q9UHK6;Q9UHK6-5                                                                             | Alpha-methylacyl-CoA racemase                                                                          | AMACR                   | CTS0/PBS | AMACR    | not considered/background |              | 2            |
| 586 | P06730;P06730-3;D6RBW1;P06730-2                                                                    | Eukaryotic translation initiation factor 4E                                                            | EIF4E                   | CTS0/PBS | EIF4E    | not considered/background | -0,098969012 | -0,462366483 |
| 588 | D6RC71;D6R4F8;Q9P2W9                                                                               | Syntaxin-18                                                                                            | STX18                   | CTS0/PBS | STX18    | not considered/background |              | 0            |
| 589 | D6R6AB;D6RFG5;P12429;D6RAZ8;D6                                                                     | Annexin A3                                                                                             | ANXA3                   | CTS0/PBS | ANXA3    | not considered/background |              | 2            |
| 590 | D6RE41;Q9H173;A0R286                                                                               | Nucleotide exchange factor SIL1                                                                        | SIL1                    | CTS0/PBS | SIL1     | not considered/background |              | 0,2804573    |
| 593 | D6RERS;D6RGJ3;Q9NVA2;Q9NVA2-2;Septin-11                                                            |                                                                                                        | SEPT11                  | CTS0/PBS | SEPT11   | not considered/background | -0,185867988 | -0,368935932 |
| 594 | D6REX3;Q94979-6;Q94979-8;Q94979                                                                    | Protein transport protein Sec31A                                                                       | SEC31A                  | CTS0/PBS | SEC31A   | not considered/background |              | -0,116763971 |
| 596 | D6RFW1;Q96E00                                                                                      | Small glutamine-rich tetratricopeptide repeat-containing protein beta                                  | SGTB                    | CTS0/PBS | SGTB     | not considered/background | -0,262763205 | -0,065158675 |
| 597 | D6RG13;P61247;D6RAT0;D6R809;E9F                                                                    | 40S ribosomal protein 53a                                                                              | RP53A                   | CTS0/PBS | RP53A    | not considered/background |              | 0,239464899  |
| 598 | D6RG15;Q9IBS0;H0Y8S8                                                                               | Twinfilin-2                                                                                            | TWF2                    | CTS0/PBS | TWF2     | not considered/background | -0,293535754 | -0,275364696 |
| 600 | P14406;D6RGE2;D6R6H5;H0U006;D6R                                                                    | Cytochrome c oxidase subunit 7A2, mitochondrial                                                        | CXO7A2                  | CTS0/PBS | CXO7A2   | not considered/background |              | 2            |
| 607 | E9RFY9;Q9H425-2;Q9H425-3;Q9H425-3                                                                  | Uncharacterized protein C1orf198                                                                       | C1orf198                | CTS0/PBS | C1orf198 | not considered/background |              | 0            |
| 610 | ESRGK5;Q93045;Q93045-2                                                                             | Stathmin;Stathmin-2                                                                                    | STMN2                   | CTS0/PBS | STMN2    | not considered/background | -0,291097665 | -0,045163352 |
| 611 | ESRHG8;Q15369;Q15369-2;RAGMY8                                                                      | Transcription elongation factor B polypeptide 1                                                        | TCEB1                   | CTS0/PBS | TCEB1    | not considered/background | 0,805457561  | -0,18599337  |
| 612 | ESRJ88;ESRHU3;ETE5KE;E9PB19;P347                                                                   | Syndecan;Syndecan-2                                                                                    | SDC2                    | CTS0/PBS | SDC2     | not considered/background |              | -0,570074274 |
| 613 | ESRI99;P62888;A0A0B4J213;A0A0CA1                                                                   | 60S ribosomal protein L30                                                                              | RPL30                   | CTS0/PBS | RPL30    | not considered/background |              | 0,135094792  |
| 614 | ESRIW3;Q75347;ESRJD8;ESRH66;Q75                                                                    | Tubulin-specific chaperone A                                                                           | TBCA                    | CTS0/PBS | TBCA     | not considered/background | 0,227371423  | 0,107741106  |
| 615 | Q9P015;ESRIZ4;ESRHF4                                                                               | 39S ribosomal protein L15, mitochondrial                                                               | MRPL15                  | CTS0/PBS | MRPL15   | not considered/background | 0,094911647  | 0,661296059  |
| 616 | P63208;ESRIS5;E9RHI2;F8WBN3;P63                                                                    | 5.8S ribosome-associated protein 1                                                                     | SKP1                    | CTS0/PBS | SKP1     | not considered/background |              | 0,008630201  |
| 618 | Q7LSN1;E7EM64;H7C3T0                                                                               | COP9 signalosome complex subunit 6                                                                     | COP56                   | CTS0/PBS | COP56    | not considered/background | -0,284141764 | -0,130271955 |
| 619 | E7EM83;Q92932-4;Q92932-3;Q92932-3                                                                  | Protein-tyrosine-phosphatase;Receptor-type tyrosine-protein phosphatase N2                             | PTPRN2                  | CTS0/PBS | PTPRN2   | not considered/background |              | 0,375889745  |
| 620 | E9B777;E7EMF1;E7ESPA;P13701;D6R                                                                    | Integrin alpha-2                                                                                       | ITGA2                   | CTS0/PBS | ITGA2    | not considered/background |              | 0            |
| 621 | Q14254;J3QLD9;E7EMK3;K7EKW9                                                                        | Flotillin-2                                                                                            | FLOT2                   | CTS0/PBS | FLOT2    | not considered/background |              | -0,026870865 |
| 622 | E7EUW2;E7EN28;E7ETES;E7EVD6;E7                                                                     | Larotifen-3                                                                                            | ADGRL3                  | CTS0/PBS | ADGRL3   | not considered/background | -0,027263239 | -0,192067884 |
| 623 | J3XKM5;P61916;G9V3E8;E7F6B2;G3V                                                                    | Epidermal secretory protein E1                                                                         | NPC2                    | CTS0/PBS | NPC2     | not considered/background | -0,141175524 |              |
| 625 | E7EMZ9;Q9S359;E7EMZ8;Q9S359-2                                                                      | Transforming acidic coiled-coil containing protein 2                                                   | TACC2                   | CTS0/PBS | TACC2    | not considered/background |              | 0,424571484  |
| 626 | Q8IZAO-2;E7EN73;Q8IZAO;C9J519;Q8I                                                                  | Dyslexia-associated protein KIA0319-like protein                                                       | KIA0319L                | CTS0/PBS | KIA0319L | not considered/background |              | 0,070027257  |
| 627 | E7ENV7;Q86YQ8;Q86YQ8-2;Q8YV1;Q9                                                                    | Copine-8;Copine-9;Copine-5                                                                             | CPNE8;CPNE9;CPNE5       | CTS0/PBS | CPNE8    | not considered/background |              | 0            |
| 628 | P35611-2;E7EV99;P35611-6;E7ENY0;J                                                                  | Alpha-adducin                                                                                          | ADD1                    | CTS0/PBS | ADD1     | not considered/background | 0,003170443  | -0,178236585 |
| 629 | E7ES33;E7EPK1;Q16181-2;Q16181-2                                                                    | G9 Septin-7                                                                                            | SEPT7                   | CTS0/PBS | SEPT7    | not considered/background | -0,068301816 | -0,240863823 |
| 630 | E7EPME6;P33121-2;P33121-3;P33121                                                                   | Long-chain-fatty-acyl-CoA ligase 1                                                                     | ACSL1                   | CTS0/PBS | ACSL1    | not considered/background |              | -0,029700234 |
| 631 | P19404;E7ETP4                                                                                      | NADH dehydrogenase [ubiquinone] flavoprotein 2, mitochondrial                                          | NDOUFV2                 | CTS0/PBS | NDOUFV2  | not considered/background | 0,037311931  |              |
| 633 | E7EQB8;P43146;H0YQ25;J3Q993;J3Q                                                                    | Nectin receptor DCC                                                                                    | DCC                     | CTS0/PBS | DCC      | not considered/background | 0,337083006  | -0,208277598 |
| 634 | P15311;E7EZOA                                                                                      | Ezrin                                                                                                  | EZR                     | CTS0/PBS | EZR      | not considered/background | -0,487055106 | -0,875544181 |
| 635 | Q96C01;E7EQY1;C9J2V4;C9JF51                                                                        | Protein FAM136A                                                                                        | FAM136A                 | CTS0/PBS | FAM136A  | not considered/background |              | 0            |
| 636 | Q9UIA9;E7ESCK;ESRIW1;H0YB1                                                                         | Exoptin-7                                                                                              | XPO7                    | CTS0/PBS | XPO7     | not considered/background | 0,003170443  | 0,301906012  |
| 637 | H7X8K9;Q9YVQ3;Q9YVQ2;Q9YVQ0-2;Q                                                                    | Protein EFR3 homolog 8                                                                                 | EFR38                   | CTS0/PBS | EFR38    | not considered/background | 0,184089827  | -0,024177814 |
| 638 | Q9NWU5;E7ESL0;J3KCV1;Q9NWU5-2;                                                                     | 39S ribosomal protein L22, mitochondrial                                                               | MRPL22                  | CTS0/PBS | MRPL22   | not considered/background | 0,520145627  |              |
| 639 | E7ESP9;P07197;E7EMV2;P07197-2                                                                      | Neurofilament medium polypeptide                                                                       | NFM                     | CTS0/PBS | NFM      | not considered/background | -0,761555515 | -0,811388823 |
| 640 | Q6ZQ66;Q6ZQ66-2;E7ESW6                                                                             | WD repeat-containing protein 87                                                                        | WDR87                   | CTS0/PBS | WDR87    | not considered/background |              | 0,006477564  |
| 641 | E7ETU9;Q9DA69;Q9DA69-2;Q9DA69-3                                                                    | Procollagen-lysine-2-oxoglutarate 5-dioxygenase 2                                                      | PLOD2                   | CTS0/PBS | PLOD2    | not considered/background | -1,551009872 |              |
| 642 | E7ETZ4;Q9Y6E2;Q75MG1;BS5MCH;E9I                                                                    | BASIC leucine zipper and W2 domain-containing protein 2                                                | BZW2                    | CTS0/PBS | BZW2     | not considered/background | 0,081339627  | -0,023042393 |
| 643 | E7EUN2;A0A087K1U1;F5GKM9;Q9URP                                                                     | AT-GAP with GTPase, ANK repeat and PH domain-containing protein 1                                      | AGAP1                   | CTS0/PBS | AGAP1    | not considered/background |              | -0,163112244 |
| 644 | Q04637-9;E7EXK7;Q04637-8;Q04637;                                                                   | Eukaryotic translation initiation factor 4 gamma 1                                                     | EIF4G1                  | CTS0/PBS | EIF4G1   | not considered/background | -0,305146545 | 0,162783333  |
| 645 | E7EUV3;P05166;E9PDR0;P05166-2;E7                                                                   | Propionyl-CoA carboxylase beta chain, mitochondrial                                                    | PCCB                    | CTS0/PBS | PCCB     | not considered/background | 0,269870983  | 0,316348455  |
| 646 | Q15484;E7EVO1;A0A83B3R8;E9P573                                                                     | Calpain-5                                                                                              | CAPN5                   | CTS0/PBS | CAPN5    | not considered/background | -0,216887035 | -0,165815488 |
| 647 | P78164;E7P816;E7P816-2;E7P816-2                                                                    | Microtubule-associated protein 4; Microtubule-associated protein                                       | MAP4                    | CTS0/PBS | MAP4     | not considered/background | 0,006477564  | -0,130193447 |
| 648 | Q66F07-2;E7EVI5;Q66F07;H7C229;E7                                                                   | Cytosolic FMR1-interacting protein 2                                                                   | CFYF2                   | CTS0/PBS | CFYF2    | not considered/background | -0,270138386 | -0,009006460 |
| 649 | A04145;E7EVL1;E5RFR2                                                                               | Adenylyl cyclase type 8                                                                                | ADCY8                   | CTS0/PBS | ADCY8    | not considered/background | 0,168770394  | 0,092909365  |
| 650 | P23588;E7EX17;P23588-2;F8V8B9;E8F                                                                  | Eukaryotic translation initiation factor 4B                                                            | EIF4B                   | CTS0/PBS | EIF4B    | not considered/background | 0,227124934  | -0,087870133 |
| 651 | F8VZJ2;F8WOW4;Q13765;H0YHVX;E9I                                                                    | Nascent polypeptide-associated complex subunit alpha;Nascent polypeptide-associated complex NACA       | NACA                    | CTS0/PBS | NACA     | not considered/background | -0,098644569 | 0,099339893  |
| 653 | E9PB90;P52789;P52790                                                                               | Hexokinase;Hexokinase-2                                                                                | HK2                     | CTS0/PBS | HK2      | not considered/background |              | 0            |
| 655 | E9PB63;Q9NCB6-4;Q9NCB6                                                                             | E3 ubiquitin-protein ligase TRIM36                                                                     | TRIM36                  | CTS0/PBS | TRIM36   | not considered/background |              | 0,072725499  |
| 656 | Q94876-2;E9PCF7;Q94876-3;Q9ND30-3                                                                  | Transmembrane and coiled-coil domains protein 1                                                        | TMCC1                   | CTS0/PBS | TMCC1    | not considered/background |              | 0,182183769  |
| 658 | E9PCF9;Q02338;E7E9C07;C9D16                                                                        | beta-hydroxybutyrate dehydrogenase, mitochondrial                                                      | BHDH1                   | CTS0/PBS | BHDH1    | not considered/background | -0,076310742 |              |
| 659 | Q02153-2;Q02153;E9PNC2;B72685-D                                                                    | Guanylate cyclase soluble subunit beta-1                                                               | GLUCY1B3                | CTS0/PBS | GLUCY1B3 | not considered/background | -0,344318485 | -0,111298453 |
| 660 | E9PFD2;E9PCF7;Q02218-2;Q02218-2                                                                    | 2-oxoglutarate dehydrogenase, mitochondrial                                                            | OGDH                    | CTS0/PBS | OGDH     | not considered/background | -0,016964457 | 0,211447917  |
| 662 | Q9YB39;E9PCF7;P31943;G8JL86;H0YF                                                                   | Heterogeneous nuclear ribonucleoprotein H;Heterogeneous nuclear ribonucleoprotein H, N-term            | HNRNPH1;HNRNP11;HNRNP12 | CTS0/PBS | HNRNPH1  | not considered/background | 0,615552263  |              |
| 663 | E9PGD8;Q06041;Q06041-4;Q06041-3                                                                    | Clathrin coat assembly protein AP180                                                                   | SNAP19                  | CTS0/PBS | SNAP19   | not considered/background | -0,214524776 | 0,079222759  |
| 664 | E9PD12;P40123;B72835;A0A087K3Y3;                                                                   | Adenylyl cyclase-associated protein;Adenylyl cyclase-associated protein 2                              | CAP2                    | CTS0/PBS | CAP2     | not considered/background | -0,107228192 |              |
| 665 | E9PE17;Q9Y2R5;J3UE3                                                                                | 28S ribosomal protein S17, mitochondrial                                                               | MRP517                  | CTS0/PBS | MRP517   | not considered/background | 0,229218742  |              |
| 666 | Q6A6A4;Q6A6A4-2;E9PFR5;C9J521                                                                      | Far upstream element-binding protein 1                                                                 | FUBP1                   | CTS0/PBS | FUBP1    | not considered/background | 0,135553487  | -0,164657575 |
| 667 | E9PEP6;Q14786;Q14786-2;E7EXG0;Q1                                                                   | Neuroplatin-1                                                                                          | NRP1                    | CTS0/PBS | NRP1     | not considered/background | 0,047817548  | 0,158364958  |
| 668 | Q15530-2;E9PFR6;Q15530-3;Q15530-3                                                                  | 3-phosphoinositide-dependent protein kinase 1;Putative 3-phosphoinositide-dependent protein PDK1;POK2P | PDK1;POK2P              | CTS0/PBS | PDK1     | not considered/background |              | 0            |
| 669 | E9PF19;Q9Y4P3;Q96641;A0A087WXC                                                                     | Transducin beta-like protein 2                                                                         | TBL2                    | CTS0/PBS | TBL2     | not considered/background | 0,418999465  | 0,231108531  |
| 672 | E9PFN5;Q9Y2Q3;Q9Y2Q3-4;Q9Y2Q3-3                                                                    | Glutathione S-transferase kappa 1                                                                      | GSTK1                   | CTS0/PBS | GSTK1    | not considered/background | -0,091832703 | 0,020442874  |
| 673 | Q14738-2;E9PFR3;Q14738;Q14738-3                                                                    | Serine/threonine-protein phosphatase 2A 56 kDa regulatory subunit delta isoform                        | PP2RSD5                 | CTS0/PBS | PP2RSD5  | not considered/background | -0,242549984 | -0,025517057 |
| 674 | G5E9Y5;F5GVT8;E9P5G3;E9PHF7;Q8M                                                                    | Methylcrotonyl-CoA carboxylase subunit alpha, mitochondrial                                            | MCCC1                   | CTS0/PBS | MCCC1    | not considered/background |              | 0            |
| 675 | E9PG40;Q05067;Q05067-2;Q05067-2                                                                    | Protein phosphatase 4A1                                                                                | PPP4A                   | CTS0/PBS | PPP4A    | not considered/background | 0,104336666  | 0,056641237  |
| 677 | P78559;P78559-2;E9PFC6                                                                             | Microtubule-associated protein 1A;MAP1A heavy chain;MAP1 light chain LC2                               | MAP1A                   | CTS0/PBS | MAP1A    | not considered/background | 0,085424656  | 0,159540795  |
| 678 | E9PGT1;Q15631;H7C1D4;Q15631-2;A                                                                    | Translin                                                                                               | TSN                     | CTS0/PBS | TSN      | not considered/background | -0,130267575 | -0,150559677 |
| 679 | Q99627-2;E9PGT6;Q99627;H7C3S9                                                                      | COP9 signalosome complex subunit 8                                                                     | COP58                   | CTS0/PBS | COP58    | not considered/background |              | -0,064882852 |
| 680 | E9PH64;Q9Y6M9;A0A3831T57;E7EWZ2                                                                    | NADH dehydrogenase [ubiquinone] 1 beta subcomplex subunit 9                                            | NDOUF89                 | CTS0/PBS | NDOUF89  | not considered/background | -0,106156324 | -0,218347209 |
| 682 | Q30001-8;Q30001-14;E9PHM6;F6QM                                                                     | Dystonin                                                                                               | DST                     | CTS0/PBS | DST      | not considered/background |              | 0            |
| 683 | E9PFLT;E9PFLT;P28161-2;E9PHN6;P7                                                                   | Glutathione S-transferase Mu 2;Glutathione S-transferase Mu 4;Glutathione S-transferase Mu 1           | GSTM2;GSTM1;GSTM4       | CTS0/PBS | GSTM2    | not considered/background |              | 0            |
| 684 | Q43813;E9PHS0;E9PHS0-2;E9PHS0-2                                                                    | LacI-like protein 1                                                                                    | LAC1                    | CTS0/PBS | LAC1     | not considered/background |              | 0            |
| 685 | Q43491-2;E9PHJ3;Q9AP55;E9PHK5;C                                                                    | Band 4.1-like protein 2                                                                                | EPB412                  | CTS0/PBS | EPB412   | not considered/background |              | 0            |
| 687 | E9PN66;E9PKN9;E9PMW4;E9PMW4-2                                                                      | Protein p53-inducible protein 11                                                                       | TP5311                  | CTS0/PBS | TP5311   | not considered/background | 0,146785541  | 0,030383472  |
| 688 | E9PIM6;P04216;E9PNQ8;J3QRJ3                                                                        | Thy-1 membrane glycoprotein                                                                            | THY1                    | CTS0/PBS | THY1     | not considered/background | -0,27721924  | -0,05630606  |
| 690 | E9PJ81;E9PRQ7;Q04323;Q04323-2;A                                                                    | UBX domain-containing protein 1                                                                        | UBXN1                   | CTS0/PBS | UBXN1    | not considered/background | 0,019773069  |              |
| 692 | E9PJP2;Q5TF21;H38888;J3QL92;Q9Y4                                                                   | Protein SGOA3                                                                                          | SGOA3                   | CTS0/PBS | SGOA3    | not considered/background | 0,129744606  | 0,136220096  |
| 693 | P29692;E9PK01;E9PRY8;E9PPR1;P29                                                                    | Elongation factor 1-delta                                                                              | EIF1D                   | CTS0/PBS | EIF1D    | not considered/background | -0,036881045 | -0,09071796  |
| 695 | Q99873-5;E9PKF1;Q99873-4;Q99873                                                                    | Protein arginine N-methyltransferase 1                                                                 | PRMT1                   | CTS0/PBS | PRMT1    | not considered/background |              | 0            |
| 696 | E9PKV2;Q9NRK2                                                                                      | 39S ribosomal protein L17, mitochondrial                                                               | MRPL17                  | CTS0/PBS | MRPL17   | not considered/background |              | 0            |
| 698 | Q9N200;P62917;G3V1A1;E9PKU4;E9P                                                                    | 60S ribosomal protein L8                                                                               | RPL8                    | CTS0/PBS | RPL8     | not considered/background | 0,097206246  | 0,073120047  |
| 701 | E9PLK3;P55786;P55786-2;A6NCE2;H                                                                    | Puromycin-sensitive aminopeptidase                                                                     | NPEPP5                  | CTS0/PBS | NPEPP5   | not considered/background | -0,32631695  | -0,147567207 |
| 702 | E9PLL6;P46776;E9PJD9;E9PLX7                                                                        | 60S ribosomal protein L27a                                                                             | RPL27A                  | CTS0/PBS | RPL27A   | not considered/background |              | 0            |
| 703 | E9PPJ5;P21741;E9PLM6;P21741-2                                                                      | Midline                                                                                                | MDK                     | CTS0/PBS | MDK      | not considered/background | -0,181116725 |              |
| 704 | Q9B086-3;J3L384;F8V9H0;Q9B086-2                                                                    | Vitamin K epoxide reductase complex subunit 1                                                          | KORC1                   | CTS0/PBS | KORC1    | not considered/background | -0,118210103 | 0,1          |
| 705 | E9PM75;Q9NTG7;Q9NTG7-2;E9P8K0;N                                                                    | NAD-dependent protein deacetylase sirutin-3, mitochondrial                                             | SIRT3                   | CTS0/PBS | SIRT3    | not considered/background | 0,539828811  | 0,295552941  |
| 708 | K0M47;E9PMR4;P48509;P48509-2                                                                       | Tetraspanin CD151 antigen                                                                              | CD151                   | CTS0/PBS | CD151    | not considered/background |              | -0,16259766  |
| 709 | E9PMM6;Q9NZN5-2;Q9NZN5                                                                             | Rho guanine nucleotide exchange factor 12                                                              | ARHGEF12                | CTS0/PBS | ARHGEF12 | not considered/background |              | 0            |
| 710 | Q16890-4;Q16890-3;Q16890-2;E9PNI                                                                   | Tumor protein D53                                                                                      | TPD52L1                 | CTS0/PBS | TPD52L1  | not considered/background | -0,622976229 |              |
| 712 | E9PNW8;Q8WVX9                                                                                      | Fatty acyl-CoA reductase 1                                                                             | FAR1                    | CTS0/PBS | FAR1     | not considered/background |              | 0            |
| 714 | E9PPI2;Q8TDC3-3;Q8IWIQ3-6;Q8IWIQ3                                                                  | Serine/threonine-protein kinase BRSK1;Serine/threonine-protein kinase BRSK2                            | BRSK2;BRSK1             | CTS0/PBS | BRSK2    | not considered/background |              | 0            |
| 715 | E9PPV7;Q00217;E9PKH6;E9PN51;F8I                                                                    | NADH dehydrogenase [ubiquinone] iron-sulfur protein 8, mitochondrial                                   | NDOUF58                 | CTS0/PBS | NDOUF58  | not considered/background | 0,281075049  | 0,128282494  |
| 716 | P78406;E9PST5;E9PPC9;Q80B26                                                                        | mRNA export factor                                                                                     | RAE1                    | CTS0/PBS | RAE1     | not considered/background |              | -0,165815488 |
| 719 | E9PQB7;Q9U4U1;Q9U4U1-2;E9PQB0                                                                      | Vacuolar protein sorting-associated protein 28 homolog                                                 | VPS28                   | CTS0/PBS | VPS28    | not considered/background | 0,139469495  |              |
| 722 | Q9ULU8-4;Q9ULU8;F1T05;Q9ULU8-3                                                                     | Calcium-dependent secretion activator 1</                                                              |                         |          |          |                           |              |              |

|     |                                    |                                                                                                        |                     |          |              |                             |              |              |              |   |
|-----|------------------------------------|--------------------------------------------------------------------------------------------------------|---------------------|----------|--------------|-----------------------------|--------------|--------------|--------------|---|
| 773 | Q6P1Q0-7;Q6P1Q0;F8V2A2;Q6P1Q0-2    | LETM1 domain-containing protein 1                                                                      | LETMD1              | CTSD/PBS | LETMD1       | not considered/background   | 0,273575566  | 0,425268737  | 2            |   |
| 775 | P54819-5;P54819-7;F8W1A4;P54819    | Adenylylate kinase 2, mitochondrial;Adenylylate kinase 2, mitochondrial, N-terminally processed;Ac AK2 | NRBP1               | CTSD/PBS | NRBP1        | not considered/background   | 0            | 0,148224978  | 1            |   |
| 777 | F8W6G1;Q9UHT1;Q9JH26               | Nuclear receptor-binding protein                                                                       | NRBP1               | CTSD/PBS | NRBP1        | not considered/background   | 0            | 0,148224978  | 1            |   |
| 779 | P09651-3;F8W6G1;P09651-2;P09651-1  | Heterogeneous nuclear ribonucleoprotein A1;Heterogeneous nuclear ribonucleoprotein A1, N4              | HNRPA1              | CTSD/PBS | HNRPA1       | not considered/background   | 0,241230036  | 0,1404012041 | 1            |   |
| 780 | Q14157-2;Q14157-1;Q14157-3;F8W7    | Ubiquitin-associated protein 2-like                                                                    | UBAP2L              | CTSD/PBS | UBAP2L       | not considered/background   | 0            | -0,423874567 | 1            |   |
| 781 | F8W776;Q9H953-2;Q9H953-3;Q9H953-1  | Protein transport protein SecE1 subunit alpha isoform 2                                                | SEC61A2             | CTSD/PBS | SEC61A2      | not considered/background   | 0            | 0            | 0            |   |
| 782 | Q96A26;F8W7Q4;EP9H05               | Protein FAM162A                                                                                        | FAM162A             | CTSD/PBS | FAM162A      | not considered/background   | 0,002018361  | 0,024927485  | 2            |   |
| 783 | F8W8D4;Q8T8C4-2;Q8T8C4;F8W8F8      | NEDD8-activating enzyme E1 catalytic subunit                                                           | UBA3                | CTSD/PBS | UBA3         | not considered/background   | 0            | 0,035483152  | 1            |   |
| 788 | F8W9F9;H0Y7T5;Q9Y351-2;Q9Y351-4    | Serine/threonine-protein kinase WNK2                                                                   | WNK2                | CTSD/PBS | WNK2         | not considered/background   | 0            | 0            | 0            |   |
| 786 | F8W9U4;P7781E-3                    | Microtubule-associated protein                                                                         | MAP4                | CTSD/PBS | MAP4         | not considered/background   | 0,022273139  | -0,232169543 | 2            |   |
| 787 | H0Y5T1;Q72460-7;Q72460-4;F8W4A1    | CluP-associated protein 1                                                                              | CLASP1              | CTSD/PBS | CLASP1       | not considered/background   | 0            | 0            | 0            |   |
| 788 | F8W408;Q9P0K1-4;Q9P0K1-3;Q9P0K1-2  | Disintegrin and metalloproteinase domain-containing protein 22                                         | ADAM22              | CTSD/PBS | ADAM22       | not considered/background   | 0            | -0,207018226 | 1            |   |
| 789 | F8W8F9;Q9UGV2-3;Q9UGV2-2;Q9UGV1    | Protein NDRG3                                                                                          | NDRG3               | CTSD/PBS | NDRG3        | not considered/background   | -0,008058275 | -0,078883047 | 2            |   |
| 790 | Q3JRU4;P63027;F8WCA0;L7N2F9;K7E    | Vesicle-associated membrane protein 2                                                                  | VAMP2               | CTSD/PBS | VAMP2        | not considered/background   | 0,119156942  | -0,085696581 | 2            |   |
| 791 | P59998;F8WCF6;F8W0D7;P59998-3      | Actin-related protein 2/3 complex subunit 4                                                            | ARPC4;ARPC4-TLL3    | CTSD/PBS | ARPC4        | not considered/background   | -0,308001389 | -0,273336847 | 2            |   |
| 796 | F8W569                             |                                                                                                        | CLTA                | CTSD/PBS | CLTA         | not considered/background   | 0,266036894  | -0,012211084 | 2            |   |
| 794 | Q13586-2;Q13586;G0X0G9;EP9R4-4     | Stromal interaction molecule 1                                                                         | STIM1               | CTSD/PBS | STIM1        | not considered/background   | 0            | 0            | 0            |   |
| 798 | P49821-2;G3V0V5;P49821-1;B4QD93;E5 | NADH dehydrogenase [ubiquinone] flavoprotein 1, mitochondrial                                          | NDUFV1              | CTSD/PBS | NDUFV1       | not considered/background   | -0,053673376 | 0            | 2            |   |
| 799 | G3V14E;P48058-2;P48058;E99J25-4    | Glutamate receptor 4                                                                                   | GRM4                | CTSD/PBS | GRM4         | not considered/background   | 0            | 0,051264607  | 1            |   |
| 800 | Q9NY33;G3V1D3;G3V1D3;Q9NY33-4      | Dipeptidyl peptidase 3                                                                                 | PPP3                | CTSD/PBS | PPP3         | not considered/background   | 0            | -0,069845534 | 0,039699918  | 2 |
| 802 | G3V1D8;Q50L69                      | Leucine-rich repeat-containing protein 24                                                              | LRRC24              | CTSD/PBS | LRRC24       | not considered/background   | 0,299830762  | 0            | 1            |   |
| 803 | G3V1P3;Q969J3                      | Loss of heterozygosity 12 chromosomal region 1 protein                                                 | LOH12CR1            | CTSD/PBS | LOH12CR1     | not considered/background   | 0            | 0,124777039  | 1            |   |
| 804 | Q8WVV3-3;G3V1R2;Q8WVV3-2;Q8W       | Reticulon-4-interacting protein 1, mitochondrial                                                       | RTN4IP1             | CTSD/PBS | RTN4IP1      | not considered/background   | 0,130271955  | 0            | 1            |   |
| 805 | Q75334;Q75334-3;G3V200;Q75334-4    | Liprin-alpha-2                                                                                         | PPFIA2              | CTSD/PBS | PPFIA2       | not considered/background   | 0            | -0,129168003 | -0,02672925  | 2 |
| 807 | G3V256;Q9Y5H8;H0YJH8;H0Y550;G3V    | V-type protein ATPase subunit D                                                                        | ATP6V1D             | CTSD/PBS | ATP6V1D      | Lysosomal membrane proteins | -0,004913521 | -0,136716384 | 2            |   |
| 808 | P07311;G3V2U7                      | Acylphosphatase 1;Acylphosphatase                                                                      | AC1                 | CTSD/PBS | AC1          | not considered/background   | 0            | 0            | 0            |   |
| 809 | G3V325;P56134-4;C9J1T5;P56134-2    | ATP synthase subunit f, mitochondrial                                                                  | ATP5F1;PTCD1;ATP5I2 | CTSD/PBS | ATP5I2-PTCD1 | not considered/background   | 0,181420664  | 0,142273738  | 2            |   |
| 811 | G3V410;Q75356;G3V450;H0YJH1;REV    | Ectonucleoside triphosphate diphosphohydrolase 5                                                       | ENTPD5              | CTSD/PBS | ENTPD5       | not considered/background   | 0,688135588  | 0            | 1            |   |
| 812 | P60983;G3V4P8;MQQV68;M0R1D2;M      | Glia maturation factor beta                                                                            | GMFB                | CTSD/PBS | GMFB         | not considered/background   | 0            | 0            | 0            |   |
| 813 | G3V583;Q8N128-2                    | Protein FAM177A1                                                                                       | FAM177A1            | CTSD/PBS | FAM177A1     | not considered/background   | 0            | -0,088684372 | 1            |   |
| 814 | Q96PC5-11;Q96PC5-5;Q96PC5-8;Q96    | Melanoma inhibitory activity protein 2;CtAGE family member 2                                           | MA2;CTAGE1          | CTSD/PBS | MA2          | not considered/background   | 0            | 0            | 0            |   |
| 815 | P60900;G3V2J7;G3V295;P60900-2      | Proteasome subunit alpha type-6;Proteasome subunit alpha type                                          | PSMA6               | CTSD/PBS | PSMA6        | not considered/background   | 0,122076304  | -0,112766845 | 2            |   |
| 816 | G3XAI2;P07942;E27E6A               | Laminin subunit beta-1                                                                                 | LAMB1               | CTSD/PBS | LAMB1        | not considered/background   | 0            | 0            | 0            |   |
| 819 | G5E968;P10645                      | Chromogranin-A;Vasostatin-2;EA-92;ES-43;Pancreastatin;SS-18;WA-8;WE-14;LF-19                           | CHGA                | CTSD/PBS | CHGA         | not considered/background   | 0            | 0            | 0            |   |
| 820 | P42167-2;G5E972;P42167-1;P42167-3  | Lamina-associated polypeptide 2, isoforms beta/gamma;Thymopoietin;Thymopentin;Lamina-as                | TMPO                | CTSD/PBS | TMPO         | not considered/background   | 0            | -0,313129735 | 1            |   |
| 821 | G5E967;Q9P252;Q9P252-2;P58401;H    | Neurexin-2                                                                                             | NRXN2               | CTSD/PBS | NRXN2        | not considered/background   | 0            | -0,197384895 | -0,09328973  | 2 |
| 822 | G5E958;Q07866-8;F8W6L3;E7EVH7      | Kinesin light chain 1                                                                                  | KLC1                | CTSD/PBS | KLC1         | not considered/background   | 0            | -0,26091232  | -0,124592825 | 2 |
| 823 | G5E9V7;G5E9V5;P82650;H7C5L9;H7     | 28S ribosomal protein S22, mitochondrial                                                               | MRPS22              | CTSD/PBS | MRPS22       | not considered/background   | 0            | 0,778505927  | 0,377781804  | 2 |
| 824 | G5E922;Q96KAS-2;Q96KAS             | Cleft lip and palate transmembrane protein 1-like protein                                              | CLPTM1L             | CTSD/PBS | CLPTM1L      | not considered/background   | 0            | 0            | 0            |   |
| 825 | G5E406;Q9J552-3;Q9J552-1;Q9J552-2  | 28S ribosomal protein S27, mitochondrial                                                               | MRPS27              | CTSD/PBS | MRPS27       | not considered/background   | 0,402613043  | -0,302332919 | 2            |   |
| 826 | G5E406;Q9J552-3;Q9J552-1;Q9J552-2  | 28S ribosomal protein S27, mitochondrial                                                               | MRPS27              | CTSD/PBS | MRPS27       | not considered/background   | 0            | -0,139653784 | 0,125242372  | 2 |
| 827 | G5E406;Q9J552-3;Q9J552-1;Q9J552-2  | 28S ribosomal protein S27, mitochondrial                                                               | MRPS27              | CTSD/PBS | MRPS27       | not considered/background   | 0            | 0            | 0            |   |
| 828 | G5E406;Q9J552-3;Q9J552-1;Q9J552-2  | 28S ribosomal protein S27, mitochondrial                                                               | MRPS27              | CTSD/PBS | MRPS27       | not considered/background   | 0            | 0            | 0            |   |
| 829 | G5E406;Q9J552-3;Q9J552-1;Q9J552-2  | 28S ribosomal protein S27, mitochondrial                                                               | MRPS27              | CTSD/PBS | MRPS27       | not considered/background   | 0            | 0            | 0            |   |
| 830 | G5E406;Q9J552-3;Q9J552-1;Q9J552-2  | 28S ribosomal protein S27, mitochondrial                                                               | MRPS27              | CTSD/PBS | MRPS27       | not considered/background   | 0            | 0            | 0            |   |
| 831 | G5E406;Q9J552-3;Q9J552-1;Q9J552-2  | 28S ribosomal protein S27, mitochondrial                                                               | MRPS27              | CTSD/PBS | MRPS27       | not considered/background   | 0            | 0            | 0            |   |
| 832 | G5E406;Q9J552-3;Q9J552-1;Q9J552-2  | 28S ribosomal protein S27, mitochondrial                                                               | MRPS27              | CTSD/PBS | MRPS27       | not considered/background   | 0            | 0            | 0            |   |
| 833 | G5E406;Q9J552-3;Q9J552-1;Q9J552-2  | 28S ribosomal protein S27, mitochondrial                                                               | MRPS27              | CTSD/PBS | MRPS27       | not considered/background   | 0            | 0            | 0            |   |
| 834 | G5E406;Q9J552-3;Q9J552-1;Q9J552-2  | 28S ribosomal protein S27, mitochondrial                                                               | MRPS27              | CTSD/PBS | MRPS27       | not considered/background   | 0            | 0            | 0            |   |
| 835 | G5E406;Q9J552-3;Q9J552-1;Q9J552-2  | 28S ribosomal protein S27, mitochondrial                                                               | MRPS27              | CTSD/PBS | MRPS27       | not considered/background   | 0            | 0            | 0            |   |
| 836 | G5E406;Q9J552-3;Q9J552-1;Q9J552-2  | 28S ribosomal protein S27, mitochondrial                                                               | MRPS27              | CTSD/PBS | MRPS27       | not considered/background   | 0            | 0            | 0            |   |
| 837 | G5E406;Q9J552-3;Q9J552-1;Q9J552-2  | 28S ribosomal protein S27, mitochondrial                                                               | MRPS27              | CTSD/PBS | MRPS27       | not considered/background   | 0            | 0            | 0            |   |
| 838 | G5E406;Q9J552-3;Q9J552-1;Q9J552-2  | 28S ribosomal protein S27, mitochondrial                                                               | MRPS27              | CTSD/PBS | MRPS27       | not considered/background   | 0            | 0            | 0            |   |
| 839 | G5E406;Q9J552-3;Q9J552-1;Q9J552-2  | 28S ribosomal protein S27, mitochondrial                                                               | MRPS27              | CTSD/PBS | MRPS27       | not considered/background   | 0            | 0            | 0            |   |
| 840 | G5E406;Q9J552-3;Q9J552-1;Q9J552-2  | 28S ribosomal protein S27, mitochondrial                                                               | MRPS27              | CTSD/PBS | MRPS27       | not considered/background   | 0            | 0            | 0            |   |
| 841 | G5E406;Q9J552-3;Q9J552-1;Q9J552-2  | 28S ribosomal protein S27, mitochondrial                                                               | MRPS27              | CTSD/PBS | MRPS27       | not considered/background   | 0            | 0            | 0            |   |
| 842 | G5E406;Q9J552-3;Q9J552-1;Q9J552-2  | 28S ribosomal protein S27, mitochondrial                                                               | MRPS27              | CTSD/PBS | MRPS27       | not considered/background   | 0            | 0            | 0            |   |
| 843 | G5E406;Q9J552-3;Q9J552-1;Q9J552-2  | 28S ribosomal protein S27, mitochondrial                                                               | MRPS27              | CTSD/PBS | MRPS27       | not considered/background   | 0            | 0            | 0            |   |
| 844 | G5E406;Q9J552-3;Q9J552-1;Q9J552-2  | 28S ribosomal protein S27, mitochondrial                                                               | MRPS27              | CTSD/PBS | MRPS27       | not considered/background   | 0            | 0            | 0            |   |
| 845 | G5E406;Q9J552-3;Q9J552-1;Q9J552-2  | 28S ribosomal protein S27, mitochondrial                                                               | MRPS27              | CTSD/PBS | MRPS27       | not considered/background   | 0            | 0            | 0            |   |
| 846 | G5E406;Q9J552-3;Q9J552-1;Q9J552-2  | 28S ribosomal protein S27, mitochondrial                                                               | MRPS27              | CTSD/PBS | MRPS27       | not considered/background   | 0            | 0            | 0            |   |
| 847 | G5E406;Q9J552-3;Q9J552-1;Q9J552-2  | 28S ribosomal protein S27, mitochondrial                                                               | MRPS27              | CTSD/PBS | MRPS27       | not considered/background   | 0            | 0            | 0            |   |
| 848 | G5E406;Q9J552-3;Q9J552-1;Q9J552-2  | 28S ribosomal protein S27, mitochondrial                                                               | MRPS27              | CTSD/PBS | MRPS27       | not considered/background   | 0            | 0            | 0            |   |
| 849 | G5E406;Q9J552-3;Q9J552-1;Q9J552-2  | 28S ribosomal protein S27, mitochondrial                                                               | MRPS27              | CTSD/PBS | MRPS27       | not considered/background   | 0            | 0            | 0            |   |
| 850 | G5E406;Q9J552-3;Q9J552-1;Q9J552-2  | 28S ribosomal protein S27, mitochondrial                                                               | MRPS27              | CTSD/PBS | MRPS27       | not considered/background   | 0            | 0            | 0            |   |
| 851 | G5E406;Q9J552-3;Q9J552-1;Q9J552-2  | 28S ribosomal protein S27, mitochondrial                                                               | MRPS27              | CTSD/PBS | MRPS27       | not considered/background   | 0            | 0            | 0            |   |
| 852 | G5E406;Q9J552-3;Q9J552-1;Q9J552-2  | 28S ribosomal protein S27, mitochondrial                                                               | MRPS27              | CTSD/PBS | MRPS27       | not considered/background   | 0            | 0            | 0            |   |
| 853 | G5E406;Q9J552-3;Q9J552-1;Q9J552-2  | 28S ribosomal protein S27, mitochondrial                                                               | MRPS27              | CTSD/PBS | MRPS27       | not considered/background   | 0            | 0            | 0            |   |
| 854 | G5E406;Q9J552-3;Q9J552-1;Q9J552-2  | 28S ribosomal protein S27, mitochondrial                                                               | MRPS27              | CTSD/PBS | MRPS27       | not considered/background   | 0            | 0            | 0            |   |
| 855 | G5E406;Q9J552-3;Q9J552-1;Q9J552-2  | 28S ribosomal protein S27, mitochondrial                                                               | MRPS27              | CTSD/PBS | MRPS27       | not considered/background   | 0            | 0            | 0            |   |
| 856 | G5E406;Q9J552-3;Q9J552-1;Q9J552-2  | 28S ribosomal protein S27, mitochondrial                                                               | MRPS27              | CTSD/PBS | MRPS27       | not considered/background   | 0            | 0            | 0            |   |
| 857 | G5E406;Q9J552-3;Q9J552-1;Q9J552-2  | 28S ribosomal protein S27, mitochondrial                                                               | MRPS27              | CTSD/PBS | MRPS27       | not considered/background   | 0            | 0            | 0            |   |
| 858 | G5E406;Q9J552-3;Q9J552-1;Q9J552-2  | 28S ribosomal protein S27, mitochondrial                                                               | MRPS27              | CTSD/PBS | MRPS27       | not considered/background   | 0            | 0            | 0            |   |
| 859 | G5E406;Q9J552-3;Q9J552-1;Q9J552-2  | 28S ribosomal protein S27, mitochondrial                                                               | MRPS27              | CTSD/PBS | MRPS27       | not considered/background   | 0            | 0            | 0            |   |
| 860 | G5E406;Q9J552-3;Q9J552-1;Q9J552-2  | 28S ribosomal protein S27, mitochondrial                                                               | MRPS27              | CTSD/PBS | MRPS27       | not considered/background   | 0            | 0            | 0            |   |
| 861 | G5E406;Q9J552-3;Q9J552-1;Q9J552-2  | 28S ribosomal protein S27, mitochondrial                                                               | MRPS27              | CTSD/PBS | MRPS27       | not considered/background   | 0            | 0            | 0            |   |
| 862 | G5E406;Q9J552-3;Q9J552-1;Q9J552-2  | 28S ribosomal protein S27, mitochondrial                                                               | MRPS27              | CTSD/PBS | MRPS27       | not considered/background   | 0            | 0            | 0            |   |
| 863 | G5E406;Q9J552-3;Q9J552-1;Q9J552-2  | 28S ribosomal protein S27, mitochondrial                                                               | MRPS27              | CTSD/PBS | MRPS27       | not considered/background   | 0            | 0            | 0            |   |
| 864 | G5E406;Q9J552-3;Q9J552-1;Q9J552-2  | 28S ribosomal protein S27, mitochondrial                                                               | MRPS27              | CTSD/PBS | MRPS27       | not considered/background   | 0            | 0            | 0            |   |
| 865 | G5E406;Q9J552-3;Q9J552-1;Q9J552-2  | 28S ribosomal protein S27, mitochondrial                                                               | MRPS27              | CTSD/PBS | MRPS27       | not considered/background   | 0            | 0            | 0            |   |
| 866 | G5E406;Q9J552-3;Q9J552-1;Q9J552-2  | 28S ribosomal protein S27, mitochondrial                                                               | MRPS27              | CTSD/PBS | MRPS27       | not considered/background   | 0            | 0            | 0            |   |
| 867 | G5E406;Q9J552-3;Q9J552-1;Q9J552-2  | 28S ribosomal protein S27, mitochondrial                                                               | MRPS27              | CTSD/PBS | MRPS27       | not considered/background   | 0            | 0            | 0            |   |
| 868 | G5E406;Q9J552-3;Q9J552-1;Q9J552-2  | 28S ribosomal protein S27, mitochondrial                                                               | MRPS27              | CTSD/PBS | MRPS27       | not considered/background   | 0            | 0            | 0            |   |
| 869 | G5E406;Q9J552-3;Q9J552-1;Q9J552-2  | 28S ribosomal protein S27, mitochondrial                                                               | MRPS27              | CTSD/PBS | MRPS27       | not considered/background   | 0            | 0            | 0            |   |
| 870 | G5E406;Q9J552-3;Q9J552-1;Q9J552-2  | 28S ribosomal protein S27, mitochondrial                                                               | MRPS27              | CTSD/PBS | MRPS27       | not considered/background   | 0            | 0            | 0            |   |
| 871 | G5E406;Q9J552-3;Q9J552-1;Q9J552-2  | 28S ribosomal protein S27, mitochondrial                                                               | MRPS27              | CTSD/PBS | MRPS27       | not considered/background   | 0            | 0            | 0            |   |
| 872 | G5E406;Q9J552-3;Q9J552-1;Q9J552-2  | 28S ribosomal protein S27, mitochondrial                                                               | MRPS27              | CTSD/PBS | MRPS27       | not considered/background   | 0            | 0            | 0            |   |
| 873 | G5E406;Q9J552-3;Q9J552-1;Q9J552-2  | 28S ribosomal protein S27, mitochondrial                                                               | MRPS27              | CTSD/PBS | MRPS27       | not considered/background   | 0            | 0            | 0            |   |
| 874 | G5E406;Q9J552-3;Q9J552-1;Q9J552-2  | 28S ribosomal protein S27, mitochondrial                                                               | MRPS27              | CTSD/PBS | MRPS27       | not considered/background   | 0            | 0            | 0            |   |
| 875 | G5E406;Q9J552-3;Q9J552-1;Q9J552-2  | 28S ribosomal protein S27, mitochondrial                                                               | MRPS27              | CTSD/PBS | MRPS27       | not considered/background   | 0            | 0            | 0            |   |
| 876 | G5E406;Q9J552-3;Q9J552-1;Q9J552-2  | 28S ribosomal protein S27, mitochondrial                                                               | MRPS27              | CTSD/PBS | MRPS27       | not considered/background   | 0            | 0            | 0            |   |
| 877 | G5E406;Q9J552-3;Q9J552-1;Q9J552-2  | 28S ribosomal protein S27, mitochondrial                                                               | MRPS27              | CTSD/PBS | MRPS27       | not considered/background   | 0            | 0            | 0            |   |
| 878 | G5E406;Q9J552-3;Q9J552-1;Q9J552-2  | 28S ribosomal protein S27, mitochondrial                                                               | MRPS27              | CTSD/PBS | MRPS27       | not considered/background   | 0            | 0            | 0            |   |
| 879 | G5E406;Q9J552-3;Q9J552-1;Q9J552-2  | 28S ribosomal protein S27, mitochondrial                                                               | MRPS27              | CTSD/PBS | MRPS27       | not considered/background   | 0            | 0            | 0            |   |
| 880 | G5E406;Q9J552-3;Q9J552-1;Q9J552-2  | 28S ribosomal protein S27, mitochondrial                                                               | MRPS27              | CTSD/PBS | MRPS27       | not considered/background   | 0            | 0            | 0            |   |
| 881 | G5E406;Q9J552-3;Q9J552-1;Q9J552-2  | 28S ribosomal protein S27, mitochondrial                                                               | MRPS27              | CTSD/PBS | MRPS27       | not considered/background   | 0            | 0            | 0            |   |
| 882 | G5E406;Q9J552-3;Q9J552-1;Q9J552-2  | 28S ribosomal protein S27, mitochondrial                                                               | MRPS27              | CTSD/PBS | MRPS27       | not considered/background   | 0            | 0            | 0            |   |
| 883 | G5E406;Q9J552-3;Q9J552-1;Q9J552-2  | 28S ribosomal protein S27, mitochondrial                                                               | MRPS27              | CTSD/PBS | MRPS27       | not considered/background   | 0            | 0            | 0            |   |
| 884 | G5E406;Q9J552-3;Q9J552-1;Q9J552-2  | 28S ribosomal protein S27, mitochondrial                                                               | MRPS27              | CTSD/PBS | MRPS27       | not considered/background   | 0            | 0            | 0            |   |
| 885 | G5E406;Q9J552-3;Q9J552-1;Q9J552-2  | 28S ribosomal protein S27, mitochondrial                                                               | MRPS27              | CTSD/PBS | MRPS27       | not considered/background   | 0            | 0            | 0            |   |
| 886 | G5E406;Q9J552-3;Q9J552-1;Q9J552-2  | 28S ribosomal protein S27, mitochondrial                                                               | MRPS27              | CTSD/PBS | MR           |                             |              |              |              |   |

|      |                                    |                                                                                                                   |                    |          |          |                           |              |              |   |
|------|------------------------------------|-------------------------------------------------------------------------------------------------------------------|--------------------|----------|----------|---------------------------|--------------|--------------|---|
| 963  | J3K5V6;Q8TCD5;J3KSX6;J3KRC4        | 5(3)-deoxyribonucleotidase, cytosolic type                                                                        | NTSC               | CTSD/PBS | NTSC     | not considered/background |              |              | 0 |
| 964  | J3QR09;J3KTE4;P84098               | Ribosomal protein L19;60S ribosomal protein L19                                                                   | RPL19              | CTSD/PBS | RPL19    | not considered/background | 0,113033665  | -0,10755397  | 2 |
| 965  | Q07955;J3KTL2;J3KSW8;Q07955-3;Q0   | Serine/arginine-rich splicing factor 1                                                                            | SRSF1              | CTSD/PBS | SRSF1    | not considered/background |              | -0,047957107 | 1 |
| 967  | Q0Y189;J3QJ53;J3QJ53;J3KJ38;J3QJ53 | Ribosomal protein S7, mitochondrial                                                                               | MRP52              | CTSD/PBS | MRP52    | not considered/background |              | 0,190042332  | 1 |
| 972  | P19105;Q14950;J3Q8S3;P24844-2;P2   | Myosin regulatory light chain 12A;Myosin regulatory light chain 12B;Myosin regulatory light po                    | MYL12A;MYL12B;MYL9 | CTSD/PBS | MYL12A   | not considered/background |              | 0,032639538  | 1 |
| 976  | Q08R06;J3QTA6;J3QTB2;H0Y922        | MICOS complex subunit MIC25                                                                                       | CHCHD6             | CTSD/PBS | CHCHD6   | not considered/background | 0,199499604  | -0,331880875 | 2 |
| 976  | K7EID2;Q0BT22-2;Q0BT22             | Chitobiosyl(diphosphodicholol beta-mannosyl)transferase                                                           | ALG1               | CTSD/PBS | ALG1     | not considered/background |              | -0,393303636 | 1 |
| 978  | K7EIP4;Q16787-4;A0A0A0MTS5;Q167    | Laminin subunit alpha-3                                                                                           | LAMA3              | CTSD/PBS | LAMA3    | not considered/background |              |              | 0 |
| 980  | K7EIE8;K7EKE6;P36776-2;P36776;P3   | Lon protease homolog, mitochondrial                                                                               | LONP1              | CTSD/PBS | LONP1    | not considered/background | 0,238664592  | 0,474572529  | 2 |
| 981  | K7EK00;Q66ND0;K7EPG9;K7EKQ2        | Protein FAM210A                                                                                                   | FAM210A            | CTSD/PBS | FAM210A  | not considered/background |              |              | 0 |
| 982  | K7EQ27;K7E187;K7E187;K7EPF35;K7E   | NADH dehydrogenase [ubiquinone] 1 alpha subcomplex subunit 11                                                     | NDUFA11            | CTSD/PBS | NDUFA11  | not considered/background | 0,282973489  |              | 1 |
| 983  | K7EK10;Q92817;A8MZ36               | Enovoplakin;Enovoplakin-like protein                                                                              | EVPL;EVPLL         | CTSD/PBS | EVPL     | not considered/background |              |              | 0 |
| 985  | K7EKV4;Q08RG1                      | Vacuolar protein-sorting-associated protein 25                                                                    | VPS25              | CTSD/PBS | VPS25    | not considered/background |              |              | 0 |
| 987  | P14314-2;P14314;K7ELL7;K7EPW7;A    | Glucosidase 2 subunit beta                                                                                        | PRKCSH             | CTSD/PBS | PRKCSH   | not considered/background | 0,125122061  | -0,005759269 | 2 |
| 988  | K7ELQ0;Q08YD3-2;K7E561;Q08YD3;X    | 60S ribosomal protein L4, mitochondrial                                                                           | MRPL4              | CTSD/PBS | MRPL4    | not considered/background |              | 0,217474011  | 1 |
| 989  | K7EM09;K7EP90;K7ELQ9;Q6UW68        | Transmembrane protein 205                                                                                         | TMEM205            | CTSD/PBS | TMEM205  | not considered/background |              | -0,240863823 | 1 |
| 990  | Q43291-2;K7EM91;Q43291;K7ES27;K    | Kunitz-type protease inhibitor 2                                                                                  | SPINT2             | CTSD/PBS | SPINT2   | not considered/background | 0,422233001  |              | 1 |
| 992  | K7EN20;Q9NZL4;Q9NZL4-3;K7ELL6;H    | Hsp70-binding protein 1                                                                                           | HSPBP1             | CTSD/PBS | HSPBP1   | not considered/background |              |              | 0 |
| 993  | K7EN16;K7E1E1;Q0N2J0               | Transmembrane protein 256                                                                                         | TMEM256            | CTSD/PBS | TMEM256  | not considered/background |              |              | 0 |
| 995  | K7EP82;P10644-2;P10644;K7EM13;K    | cAMP-dependent protein kinase type I-alpha regulatory subunit; cAMP-dependent protein kinase                      | PRKAR1A            | CTSD/PBS | PRKAR1A  | not considered/background | 0,058939855  | -0,192572941 | 2 |
| 997  | K7ER15;Q0H0R4;K7EM77;Q0H0R4-2;K    | Halocacid dehalogenase-like hydrolase domain-containing protein 2                                                 | HDHD2              | CTSD/PBS | HDHD2    | not considered/background | 0,251688799  |              | 1 |
| 998  | Q06136;K7ERC8;Q06136-2             | 3-ketodihydroxyphenylsine reductase                                                                               | KDSR               | CTSD/PBS | KDSR     | not considered/background | 0,055334502  |              | 1 |
| 1002 | Q8N2G8-2;K7ESN3;Q8N2G8-3;Q8N2G     | GH3 domain-containing protein                                                                                     | GHDC               | CTSD/PBS | GHDC     | not considered/background |              |              | 0 |
| 1003 | Q8WVC6;K7ESP4;Q8WVC6-2             | Dephospho-CoA kinase domain-containing protein                                                                    | DKAKO              | CTSD/PBS | DKAKO    | not considered/background | -0,028130928 |              | 1 |
| 1004 | L0R6Q1                             |                                                                                                                   | SLC35A4            | CTSD/PBS | SLC35A4  | not considered/background |              | 0,348169894  | 1 |
| 1005 | Q0NP81;M0QW27;M0Q2C6;Q0NP81-1      | Serine-1RNA ligase, mitochondrial                                                                                 | SARS2              | CTSD/PBS | SARS2    | not considered/background | 0,310805431  | 0,555084293  | 2 |
| 1006 | O95571;M0QX85;M0QY80;M0QX80        | Persulfide lyase, cytosolic                                                                                       | ETHE1              | CTSD/PBS | ETHE1    | not considered/background | 0,480782124  | 0,391644923  | 2 |
| 1007 | M0R0G9;M0QXK2;M0R221;M0R2B8;U      | Small nuclear ribonucleoprotein A2; small nuclear ribonucleoprotein B                                             | SNRPA;SNRPB        | CTSD/PBS | SNRPA    | not considered/background |              |              | 0 |
| 1009 | Q6NVN1;Q8J015;P40429;M0QY51        | Putative 60S ribosomal protein L13a                                                                               | RPL13AP3           | CTSD/PBS | RPL13AP3 | not considered/background |              |              | 0 |
| 1010 | P53680-2;P53680;M0R0N4;X6R390;A    | P-2 complex subunit alpha                                                                                         | AP2S1              | CTSD/PBS | AP2S1    | not considered/background |              |              | 0 |
| 1011 | M0Q202;Q66AN5;M0R1H7               | Transmembrane protein 143                                                                                         | TMEM143            | CTSD/PBS | TMEM143  | not considered/background |              |              | 0 |
| 1012 | Q06CP6-2;Q06CP6-3;Q06CP6;M0QZ1     | GRAM domain-containing protein 1A                                                                                 | GRAMD1A            | CTSD/PBS | GRAMD1A  | not considered/background |              |              | 0 |
| 1013 | Q0Y418;Q0Y418-5;Q0Y418-15;Q0Y41    | Dystrobrevin alpha;Dystrobrevin;Dystrobrevin beta                                                                 | DTNA;DTNB          | CTSD/PBS | DTNA     | not considered/background |              |              | 0 |
| 1014 | M0QX82;Q75223;Q75223-3;H7BZK5;E    | Gamma-glutamylcyclo-oxygenase                                                                                     | GGCT               | CTSD/PBS | GGCT     | not considered/background |              | 0,309109161  | 1 |
| 1015 | M0R0F0;P46782;M0R0R2;M0QZN2        | 40S ribosomal protein S5; 40S ribosomal protein S5, N-terminally processed                                        | RP55               | CTSD/PBS | RP55     | not considered/background | 0,063364879  |              | 1 |
| 1016 | M0R0P7;M0R3D6;M0R1A7;M0R117;C      | 60S ribosomal protein L18a                                                                                        | RPL18A             | CTSD/PBS | RPL18A   | not considered/background |              |              | 0 |
| 1017 | Q9UBC2-3;M0R165;Q9UBC2;Q9UBC2      | Epidermal growth factor receptor substrate 15-like 1                                                              | EP51S1L            | CTSD/PBS | EP51S1L  | not considered/background | -0,173872561 | 0,275454497  | 2 |
| 1018 | M0R192;P30043;A0A2R87Y79;M0QZL     | Flavin reductase (NADPH)                                                                                          | BLVR8              | CTSD/PBS | BLVR8    | not considered/background |              |              | 0 |
| 1020 | Q16740;M0M208;A0A2R8YF5            | ATP-dependent Clp protease proteolytic subunit, mitochondrial; ATP-dependent Clp protease pr                      | CLPP               | CTSD/PBS | CLPP     | not considered/background |              | 0,196260464  | 1 |
| 1021 | M0R210;P62424;M0R3D0;M0QY67        | 60S ribosomal protein L16                                                                                         | RP516              | CTSD/PBS | RP516    | not considered/background |              |              | 0 |
| 1022 | M00116;A0A180GW42;A0A2R8YU0;B      | Alkyl(dihydroxyacetone)phosphate synthase, peroxisomal                                                            | AGPS               | CTSD/PBS | AGPS     | not considered/background | 0,167100969  | 0,195979493  | 2 |
| 1023 | Q13838-2;Q13838;Q00148;Q5TUJ3;A    | Spliceosome RNA helicase DDX39B; ATP-dependent RNA helicase DDX39A                                                | DDX39B;DDX39A      | CTSD/PBS | DDX39B   | not considered/background |              |              | 0 |
| 1024 | Q00154-4;Q00154-6;Q00154-7;Q0001   | Cytosolic acyl coenzyme A thioester hydrolase                                                                     | ACOT7              | CTSD/PBS | ACOT7    | not considered/background | -0,07729977  | -0,033933911 | 2 |
| 1025 | O00165-5;O00165;O00165-2;O00165    | HCLS1-associated protein X-1                                                                                      | HAX1               | CTSD/PBS | HAX1     | not considered/background |              |              | 0 |
| 1026 | O00178                             | GTP-binding protein 1                                                                                             | GTBP1              | CTSD/PBS | GTBP1    | not considered/background | -0,084012617 |              | 1 |
| 1027 | O00186                             | Syntaxin-binding protein 3                                                                                        | STXB3              | CTSD/PBS | STXB3    | not considered/background |              |              | 0 |
| 1028 | Q00222-2;Q00222-2;E7KTC;A0A0A0M    | Metabolic glutamate receptor 8                                                                                    | GRM8               | CTSD/PBS | GRM8     | not considered/background |              |              | 0 |
| 1029 | O00231;Q00231-2;J3QRY4;J3QJ53      | 26S proteasome non-ATPase regulatory subunit 11                                                                   | PSMD11             | CTSD/PBS | PSMD11   | not considered/background | -0,324364699 | 0,194476401  | 2 |
| 1030 | Q00232;Q00232-2                    | 26S proteasome non-ATPase regulatory subunit 12                                                                   | PSMD12             | CTSD/PBS | PSMD12   | not considered/background | 0,085560625  |              | 1 |
| 1031 | Q00258-2;Q00258;H7BYES;H7C384;B    | Tail-anchored protein insertion receptor WR8                                                                      | WR8                | CTSD/PBS | WR8      | not considered/background | 0,40152125   |              | 1 |
| 1032 | Q00264;Q00264-2;U3JQM0             | Membrane-associated progesterone receptor component 1                                                             | PGRMC1             | CTSD/PBS | PGRMC1   | not considered/background | 0,289480386  | 0,208944455  | 2 |
| 1034 | O00299                             | Chloride intracellular channel protein 1                                                                          | CLIC1              | CTSD/PBS | CLIC1    | not considered/background | 0,07231164   | 0,162089043  | 2 |
| 1035 | Q00330-3;Q00330;H0YD97;Q00330-2    | Pyruvate dehydrogenase protein X component, mitochondrial                                                         | PDHX               | CTSD/PBS | PDHX     | not considered/background | 0,272859292  | 0,273744232  | 2 |
| 1036 | Q00410;Q00410-3;H0YB08;Q00410-2    | Importin-5                                                                                                        | IPCS               | CTSD/PBS | IPCS     | not considered/background | -0,062339229 | -0,100158602 | 2 |
| 1038 | Q00429-2;Q00429-3;Q00429-3;Q004    | Dynamitin-1-like protein                                                                                          | DNM1L              | CTSD/PBS | DNM1L    | not considered/background | -0,389488908 | -0,406210109 | 2 |
| 1040 | Q00442;Q00442;A6NIC1               | RNA 3'-terminal phosphate cyclase                                                                                 | RTCA               | CTSD/PBS | RTCA     | not considered/background | -0,077132348 |              | 1 |
| 1041 | Q00445;Q00445-2;K7EJ57;K7EJCA;K    | 7 Synaptotagmin-5                                                                                                 | SYT5               | CTSD/PBS | SYT5     | not considered/background |              | 0,329413427  | 1 |
| 1042 | Q00451-3;Q00451-1;Q00451-2;E5R     | GRDN family receptor alpha-2                                                                                      | GFR2               | CTSD/PBS | GFR2     | not considered/background |              |              | 0 |
| 1043 | O00483                             | Cytochrome c oxidase subunit NDUF4A                                                                               | NDUF4A             | CTSD/PBS | NDUF4A   | not considered/background | -0,023211134 | -0,212258044 | 2 |
| 1044 | O00487                             | 26S proteasome non-ATPase regulatory subunit 14                                                                   | PSMD14             | CTSD/PBS | PSMD14   | not considered/background | -0,004421415 | -0,034638318 | 2 |
| 1045 | Q00499-3;Q00499-5;Q00499;Q00499    | Myx box-dependent-interacting protein 1                                                                           | BN1                | CTSD/PBS | BN1      | not considered/background | -0,109319669 | -0,103128316 | 2 |
| 1046 | O00505;H0Y459                      | Importin subunit alpha-4                                                                                          | KPNB3              | CTSD/PBS | KPNB3    | not considered/background | -0,035927083 | -0,439357178 | 2 |
| 1047 | O00519                             | Fatty acid amide hydrolase 1                                                                                      | FAAH               | CTSD/PBS | FAAH     | not considered/background | -0,120247147 | -0,222680931 | 2 |
| 1048 | O00534;Q00534-3;Q00534-2;B4D       | H56 von Willebrand factor A domain-containing protein 5A                                                          | VWASA              | CTSD/PBS | VWASA    | not considered/background | -0,186409642 | -0,212880566 | 2 |
| 1049 | O00560-3;Q00560;B4DHN5;EP8U7;C     | Syntenin-1                                                                                                        | SDCBP              | CTSD/PBS | SDCBP    | not considered/background | -0,407497515 |              | 1 |
| 1050 | O00562-2;Q00562                    | Membrane-associated phosphatidylinositol transfer protein 1                                                       | PITPNM1            | CTSD/PBS | PITPNM1  | not considered/background | 0,012640181  |              | 1 |
| 1051 | O00592-2;Q00592                    | Podocalyxin                                                                                                       | PODXL              | CTSD/PBS | PODXL    | not considered/background |              |              | 0 |
| 1053 | O00743-2;Q00743;Q00743-3;Q5T1S     | Serine/threonine-protein phosphatase 6 catalytic subunit; Serine/threonine-protein phosphatase PPP6C              | PPP6C              | CTSD/PBS | PPP6C    | not considered/background |              |              | 0 |
| 1054 | Q00754-2;Q00754                    | Lysoosomal alpha-mannosidase; Lysoosomal alpha-mannosidase A peptide; Lysoosomal alpha-mannosidase                | MAN2B1             | CTSD/PBS | MAN2B1   | not considered/background |              |              | 0 |
| 1055 | O00764;F22ZU4;Q00764-3;Q00764-2    | Pyridoxal kinase                                                                                                  | PDXK               | CTSD/PBS | PDXK     | not considered/background | -0,011209898 | -0,163241085 | 2 |
| 1056 | O14494;Q14494-2                    | Lipid phosphate phosphohydrolase 1                                                                                | PPAP2A             | CTSD/PBS | PPAP2A   | not considered/background | -2,203302581 |              | 1 |
| 1057 | O14523-2;Q14523;E9PK05             | C2 domain-containing protein 2-like                                                                               | C2CD2L             | CTSD/PBS | C2CD2L   | not considered/background | -0,067273588 | 0,494068432  | 2 |
| 1058 | O14531;Q5TQ06                      | Dihydropyrimidinease-related protein 4                                                                            | DPYSL4             | CTSD/PBS | DPYSL4   | not considered/background | -0,137155876 | -0,121008671 | 2 |
| 1059 | O14545;F8VNX8                      | TRAF-type zinc finger domain-containing protein 1                                                                 | TRAFD1             | CTSD/PBS | TRAFD1   | not considered/background |              | -0,418459238 | 1 |
| 1060 | O14548;E5R2J1;H0YBD2               | Cytochrome c oxidase subunit 7A-related protein, mitochondrial                                                    | COX7A2L            | CTSD/PBS | COX7A2L  | not considered/background |              | -0,20589288  | 1 |
| 1061 | O14551;J3L505;H3BNK6               | Acyl carrier protein, mitochondrial; Acyl carrier protein                                                         | NDUFAB1            | CTSD/PBS | NDUFAB1  | not considered/background |              |              | 0 |
| 1062 | O14576-3;O14576-5;O14576-2;O145    | Cytoplasmic dynein 1 intermediate chain 1                                                                         | DYNC1L1            | CTSD/PBS | DYNC1L1  | not considered/background | -0,277271691 | -0,029276182 | 2 |
| 1063 | O14672;Q14672-2                    | Disintegrin and metalloproteinase domain-containing protein 10                                                    | ADAM10             | CTSD/PBS | ADAM10   | not considered/background |              |              | 0 |
| 1064 | O14737;Q14737-2;Q3HM38;X6R2P6;G    | Programmed cell death protein 5                                                                                   | PDCD5              | CTSD/PBS | PDCD5    | not considered/background |              |              | 0 |
| 1065 | O14744;Q14744-5;Q14744-2;Q14744    | Protein arginine N-methyltransferase 5; Protein arginine N-methyltransferase 5, N-terminally pro                  | PRMT5              | CTSD/PBS | PRMT5    | not considered/background | -0,146978451 | -0,236217064 | 2 |
| 1066 | O14775-3;Q14775-2;Q14775;H0YNN     | Guanine nucleotide-binding protein subunit beta-5                                                                 | GNB5               | CTSD/PBS | GNB5     | not considered/background |              | -0,282143229 | 2 |
| 1067 | O14787-2;Q14787;A0A0758780;K7E     | Transcriptin-2                                                                                                    | TNP02              | CTSD/PBS | TNP02    | not considered/background | -0,028763641 | 0,077802152  | 2 |
| 1068 | O14807;C9J806;K7E187;K7E187        | Ras-related protein M-Ras                                                                                         | MRAS               | CTSD/PBS | MRAS     | not considered/background | 0,381549883  | 0,001111303  | 2 |
| 1069 | O14818;Q14818-2;H0YB56;Q14818-4    | Proteasome subunit alpha-type-7                                                                                   | PSMA7              | CTSD/PBS | PSMA7    | not considered/background | -0,073894282 | 0,225784334  | 2 |
| 1070 | O14828;Q14828-2                    | Secretory carrier-associated membrane protein 3                                                                   | SCAMP3             | CTSD/PBS | SCAMP3   | not considered/background | 0,047398789  | -0,19093086  | 2 |
| 1071 | O14874-2;Q14874-3;Q14874;H3BUV3    | 3-methyl-2-oxobutanoate dehydrogenase ([liponamide]) kinase, mitochondrial                                        | BCKDK              | CTSD/PBS | BCKDK    | not considered/background |              |              | 0 |
| 1072 | Q5VV89;Q14880;Q5VV87               | Microsomal glutathione S-transferase 3                                                                            | MGST3              | CTSD/PBS | MGST3    | not considered/background | 0,042784398  | 0,03562391   | 2 |
| 1073 | O14917;Q14917-2;A0A087WXX2         | Protocadherin-17                                                                                                  | PCDH17             | CTSD/PBS | PCDH17   | not considered/background | 0,095586908  | -0,036890111 | 2 |
| 1074 | O14925;Q5SRD1-2;Q5SRD1             | Mitochondrial import inner membrane translocase subunit Tim23                                                     | TIMM23             | CTSD/PBS | TIMM23   | not considered/background | 0,091395186  | 0,091395186  | 1 |
| 1075 | O14949                             | Cytochrome c-b1 complex subunit 8                                                                                 | UCGCRQ             | CTSD/PBS | UCGCRQ   | not considered/background | 0,213751646  | -0,017494379 | 2 |
| 1076 | O14964-2;Q14964;J3L1P5;J3L1E3;J    | Hepatocyte growth factor-regulated tyrosine kinase substrate                                                      | HGS                | CTSD/PBS | HGS      | not considered/background | -0,025879273 | 0,119953718  | 2 |
| 1077 | O14967;Q14967-2                    | Calmegin                                                                                                          | CLGN               | CTSD/PBS | CLGN     | not considered/background |              | -0,814591438 | 1 |
| 1078 | O14980;C9J673;C9JMK9;C9JZ54;C9J    | Exportin-1                                                                                                        | XPO1               | CTSD/PBS | XPO1     | not considered/background | 0,095451881  | -0,067363367 | 2 |
| 1079 | O14994;A0A0A0MR68;A0A087W7G8       | Synapsin-3                                                                                                        | SYN3               | CTSD/PBS | SYN3     | not considered/background | 0,121678557  | -0,246225649 | 2 |
| 1081 | O15031;A0QRG9;A0A087WU36;E2PU      | Plexin-B2                                                                                                         | PLXNB2             | CTSD/PBS | PLXNB2   | not considered/background | -0,211698502 | -0,193834811 | 2 |
| 1082 | O15066-2;Q15066;F8WARG;F8WR6E1     | Kinesin-like protein KIF3B; Kinesin-like protein KIF3B, N-terminally processed; Kinesin-like protein KIF3B; KIF3C | KIF3B;KIF3C        | CTSD/PBS | KIF3B    | not considered/background | -0,066019537 | 0,309341544  | 2 |
| 1083 | O15069                             | NAC-alpha-domain-containing protein 1                                                                             | NACAD              | CTSD/PBS | NACAD    | not considered/background | -0,36670808  | -0,306961224 | 2 |
| 1084 | O15075;Q15075-2;Q5V2V9;Q15075-4    | Serine/threonine-protein kinase DCLK1                                                                             | DCLK1              | CTSD/PBS | DCLK1    | not considered/background |              |              | 0 |
| 1085 | O15085;Q15085-2                    | Rho guanine nucleotide exchange factor 11                                                                         | ARHGEF11           | CTSD/PBS | ARHGEF11 | not considered/background |              |              | 0 |
| 1086 | O15126;A0A087WXR0;Q15126-2;A0A     | Secretory carrier-associated membrane protein 1                                                                   | SCAMP1             | CTSD/PBS | SCAMP1   | not considered/background | 0,048096653  | -0,087598618 | 2 |
| 1087 | O15144;C9J7U5;G5E9J0;H7CF39;G5E    | Actin-related protein 2/3 complex subunit 2                                                                       | APRC2              | CTSD/PBS | APRC2    | not considered/background | -0,453636426 | -0,034638318 | 2 |
| 1088 | O15173;Q15173-2                    | Membrane-associated progesterone receptor component 2                                                             | PGRMC2             | CTSD/PBS | PGRMC2   | not considered/background | 0,166715445  | 0,125163697  | 2 |
| 1089 | O15212;A2AB88                      | Prefoldin subunit 6                                                                                               | PFND6              | CTSD/PBS | PFND6    | not considered/background |              |              | 0 |
|      |                                    |                                                                                                                   |                    |          |          |                           |              |              |   |

|      |                                   |                                                                                                                  |                             |          |           |                           |              |              |   |
|------|-----------------------------------|------------------------------------------------------------------------------------------------------------------|-----------------------------|----------|-----------|---------------------------|--------------|--------------|---|
| 1131 | O43865;O43865-2                   | Putative adenosylhomocysteinease 2                                                                               | AHCYL1                      | CTSD/PBS | AHCYL1    | not considered/background | -0.087794699 | 0.035386967  | 2 |
| 1132 | O43920                            | NADH dehydrogenase [ubiquinone] iron-sulfur protein 5                                                            | NDUFS5                      | CTSD/PBS | NDUFS5    | not considered/background | -0.031959741 | -0.08011186  | 2 |
| 1133 | O60245;O60245-2                   | Protocadherin-7                                                                                                  | PCDH7                       | CTSD/PBS | PCDH7     | not considered/background | -0.305324807 | 0.125777473  | 2 |
| 1134 | O60256;O60256-3;E7EP91;O60256-4   | Phosphoribosyl pyrophosphate synthase-associated protein 2                                                       | PRPSA2                      | CTSD/PBS | PRPSA2    | not considered/background | -0.177261657 | 0.240077206  | 2 |
| 1135 | O60282;O4A06G2;O60282-2;C9IU      | Kinesin heavy chain isoform 5C                                                                                   | KIF5C                       | CTSD/PBS | KIF5C     | not considered/background | -0.208077601 | -0.076695902 | 2 |
| 1136 | O60313-2;O60313-2;O60313;O6031    | Dynamin-like 120 kDa protein, mitochondrial;Dynamin-like 120 kDa protein, form S1                                | OPA1                        | CTSD/PBS | OPA1      | not considered/background | -0.153935011 | 0.276922053  | 2 |
| 1137 | O60331-2;O60331;O60331-2;O60331   | Phosphatidylinositol 4-phosphate 5-kinase type-1 gamma                                                           | PIPK51C                     | CTSD/PBS | PIPK51C   | not considered/background | -0.127494283 |              | 1 |
| 1138 | O60443;C9J584;O60443-2;O60443-3   | Non-syndromic hearing impairment protein 5                                                                       | DFNA5                       | CTSD/PBS | DFNA5     | not considered/background |              |              | 0 |
| 1139 | O60462-3;O60462-4;O60462-5;O60462 | Neuropilin-2                                                                                                     | NRP2                        | CTSD/PBS | NRP2      | not considered/background | -0.222010158 | -0.132379425 | 2 |
| 1140 | O60477-3;O60477                   | BNP/retrinoic acid-inducible neural-specific protein 1                                                           | BRINP1                      | CTSD/PBS | BRINP1    | not considered/background |              | 0.535519923  | 2 |
| 1141 | O60486;O4A0H26;O60486-2;F8WUW4-H  | Plasmin-C1                                                                                                       | PLXNC1                      | CTSD/PBS | PLXNC1    | not considered/background | 0.171206827  | 0.018127337  | 2 |
| 1142 | O60488-2;O60488;D6RP95;HOY9A0     | Long-chain-fatty-acyl-CoA ligase 4                                                                               | ACSL4                       | CTSD/PBS | ACSL4     | not considered/background | 0.023326332  | -0.033370138 | 2 |
| 1143 | O60493;O60493-2;O60493-4;O60493   | Sorlexin-3                                                                                                       | SNK3                        | CTSD/PBS | SNK3      | not considered/background | -0.144727843 | -0.202637126 | 2 |
| 1144 | O60502;O60502-4;O60502-2;O60502   | Protein O-GlcNAcase                                                                                              | MGEA5                       | CTSD/PBS | MGEA5     | not considered/background | -0.323804819 | -0.181675061 | 2 |
| 1145 | O60506-4;O60506-3;O60506-2;O6051  | Heterogeneous nuclear ribonucleoprotein Q                                                                        | SYNCRIP                     | CTSD/PBS | SYNCRIP   | not considered/background | -0.006869129 | -0.209266193 | 2 |
| 1146 | O60518;A0A096LP46;A0A096LNS2      | Ran-binding protein 6                                                                                            | RANBP6                      | CTSD/PBS | RANBP6    | not considered/background |              |              | 0 |
| 1147 | O60568;H7C258;H7C088;H7C2V1       | Procollagen-lysine-2-oxoglutarate 5-dioxygenase 3                                                                | PLOD3                       | CTSD/PBS | PLOD3     | not considered/background |              | 0.116879718  | 1 |
| 1148 | O60637-3;O60637;H0YKJ9;O60637-2   | Tessapain-3                                                                                                      | TSPAN3                      | CTSD/PBS | TSPAN3    | not considered/background |              | 0.230203013  | 2 |
| 1149 | O60664-2;O60664-4;O60664-3;O6061  | Perilipin-3                                                                                                      | PLIN3                       | CTSD/PBS | PLIN3     | not considered/background | -0.677587241 | -0.296897858 | 2 |
| 1150 | O60684;O5TJ71;O15131;P52294;S4R   | Importin subunit alpha-7;importin subunit alpha-6;importin subunit alpha-5;importin subunit : KPNAB;KPNAS;KPNAB1 | KPNAB                       | CTSD/PBS | KPNAB     | not considered/background | -0.017494373 |              | 1 |
| 1151 | O60749;O60749-2;D6RC15            | Sorting nexin-2                                                                                                  | SNX2                        | CTSD/PBS | SNX2      | Transport machinery       | 0.432825237  | 0.141366457  | 2 |
| 1152 | O60763;O60763-2                   | General vesicular transport factor p115                                                                          | USO1                        | CTSD/PBS | USO1      | not considered/background | -0.350559284 | -0.246712101 | 2 |
| 1153 | O60784-3;O60784;O60784-4;O60784   | Target of Myb protein 1                                                                                          | TOM1                        | CTSD/PBS | TOM1      | not considered/background | -0.182835204 | 0.309717011  | 2 |
| 1155 | O99880;O99879;O99877;O99879;G5    | Histone H2B type 1-L;Histone H2B type 1-M;Histone H2B type 1-N;Histone H2B type 1-H;Histone                      | HIST1H2BL;HIST1H2BM;HIST1H2 | CTSD/PBS | HIST1H2BL | not considered/background | -0.299791132 |              | 0 |
| 1156 | O60831;A6NP52;A6NMV1              | PRA1 family protein 2                                                                                            | PRAA2                       | CTSD/PBS | PRAA2     | not considered/background | 0.249991368  | 0.101319535  | 2 |
| 1157 | O60884;I31320;A0A087WT48          | DnaI homolog subfamily A member 2                                                                                | DNAA2                       | CTSD/PBS | DNAA2     | not considered/background | -0.143046517 |              | 0 |
| 1158 | O60925;E5R654;D6RG65              | Profilin subunit 1                                                                                               | PFDN1                       | CTSD/PBS | PFDN1     | not considered/background | 0.079156207  | -0.060877723 | 2 |
| 1159 | O75037-3;O75037-4;O75037-2;O750   | Kinesin-like protein KIF21B                                                                                      | KIF21B                      | CTSD/PBS | KIF21B    | not considered/background | -0.223744379 |              | 1 |
| 1160 | O75051;O75051-2                   | Plexin-A2                                                                                                        | PLXNA2                      | CTSD/PBS | PLXNA2    | not considered/background |              |              | 0 |
| 1161 | O75054;O75054-2                   | Immunoglobulin superfamily member 3                                                                              | IGSF3                       | CTSD/PBS | IGSF3     | not considered/background | 0.133432207  | 0.099061723  | 2 |
| 1162 | O75061-4;O75061-2;O75061-2;O75061 | Putative tyrosine-protein phosphatase auxilin                                                                    | DNAIC6                      | CTSD/PBS | DNAIC6    | not considered/background | -0.124188489 | -0.055195654 | 2 |
| 1163 | O75083;O75083-3;D6D606            | WD repeat-containing protein 1                                                                                   | WDR1                        | CTSD/PBS | WDR1      | not considered/background | -0.188167313 | -0.187261005 | 2 |
| 1164 | O5T0V2;O5T0V4;O75059-2;O5T0V0-1   | Sil1 homolog 1 protein                                                                                           | SLT1                        | CTSD/PBS | SLT1      | not considered/background |              |              | 0 |
| 1165 | O75110;A0A0A0MR22;O75110-2;O7510  | Probable phospholipid-transporting ATPase IIa;Phospholipid-transporting ATPase                                   | ATP9A                       | CTSD/PBS | ATP9A     | not considered/background | 0.009203827  | 0.171823394  | 2 |
| 1166 | O75145-2;O75145;R4GN36;R4GNF1-3   | Liprin-alpha-3                                                                                                   | PFPIA3                      | CTSD/PBS | PFPIA3    | not considered/background | -0.007797159 | -0.034638318 | 2 |
| 1168 | O75157-2;O75157;A0A087X0H8;Q15    | TSC2 domain family protein 1;TSC22 domain family protein 1;TSC22 domain family protein 4                         | TSC2D2;TSC2D21;TSC2D24      | CTSD/PBS | TSC2D2    | not considered/background |              |              | 0 |
| 1169 | O75165                            | DnaI homolog subfamily C member 13                                                                               | DNAIC13                     | CTSD/PBS | DNAIC13   | not considered/background |              |              | 0 |
| 1171 | O75306-2;O75306                   | NADH dehydrogenase [ubiquinone] iron-sulfur protein 2, mitochondrial                                             | NDUFS2                      | CTSD/PBS | NDUFS2    | not considered/background | 0.405338916  | 0.129891872  | 2 |
| 1172 | O75323-2;O75323-2;F8WBU5;H7C333;C | Protein Nip5pan homolog 2                                                                                        | GBAS                        | CTSD/PBS | GBAS      | not considered/background | 0.09017595   | 0.244804756  | 2 |
| 1173 | O7534R                            | V-type proton ATPase subunit G1                                                                                  | ATP6V1G1                    | CTSD/PBS | ATP6V1G1  | not considered/background | -0.036092919 | -0.231735438 | 2 |
| 1174 | O75358                            | SH3 domain-binding glutamic acid-rich-like protein                                                               | SH3BGR1                     | CTSD/PBS | SH3BGR1   | not considered/background | 0.139338514  | 0.1332898    | 2 |
| 1175 | O75380;D6R8T3                     | NADH dehydrogenase [ubiquinone] iron-sulfur protein 6, mitochondrial                                             | NDUFS6                      | CTSD/PBS | NDUFS6    | not considered/background |              | -2.841570637 | 2 |
| 1176 | O75381-2;O75381                   | Peroxisomal membrane protein PEX14                                                                               | PEX14                       | CTSD/PBS | PEX14     | not considered/background |              |              | 0 |
| 1178 | O75396;A0A087X1A9                 | Vesicle-trafficking protein SEC22b                                                                               | SEC22B                      | CTSD/PBS | SEC22B    | not considered/background | -0.012955692 | -0.108357178 | 2 |
| 1179 | O75431-2;O75431-3;C9JNK6;C9JAZ1   | Metaxin-2                                                                                                        | MTX2                        | CTSD/PBS | MTX2      | not considered/background | 0.021621858  | 0.545045051  | 2 |
| 1180 | O75436;S4R3Q6;O75436-2            | Vacuolar protein sorting-associated protein 26A                                                                  | VP526A                      | CTSD/PBS | VP526A    | not considered/background | 0.153027043  |              | 1 |
| 1182 | O75439;G3V064;F8WABZ;F8WEA6;F8    | Mitochondrial-procaspase peptidase subunit beta                                                                  | PMP2B                       | CTSD/PBS | PMP2B     | not considered/background | 0.492006766  | 0.167701359  | 0 |
| 1183 | O75477;R8Q243                     | Erlin-1                                                                                                          | ERLIN1                      | CTSD/PBS | ERLIN1    | not considered/background |              |              | 1 |
| 1184 | O75487;O75487-2                   | Glypican-4;Secreted glypican-4                                                                                   | GPC4                        | CTSD/PBS | GPC4      | not considered/background |              |              | 0 |
| 1185 | O75489;O75489-2;E9P548;G3V194;E   | NADH dehydrogenase [ubiquinone] iron-sulfur protein 3, mitochondrial                                             | NDUFS3                      | CTSD/PBS | NDUFS3    | not considered/background | 0.183708817  | 0.203369024  | 2 |
| 1186 | O75534-2;O75534-3;O75534-3;O75534 | Cold shock domain-containing protein E1                                                                          | CSD1                        | CTSD/PBS | CSD1      | not considered/background | -0.06422346  | -0.479954832 | 2 |
| 1187 | O75569-3;O75569-2;O75569;F8WEGI   | Interferon-inducible double-stranded RNA-dependent protein kinase activator A                                    | PKRKA                       | CTSD/PBS | PKRKA     | not considered/background | -0.220329955 | -0.170694234 | 2 |
| 1188 | O75663;O75663-2                   | TP41-like protein                                                                                                | TIPRL                       | CTSD/PBS | TIPRL     | not considered/background | 0.011638756  | -0.020911066 | 2 |
| 1189 | O75688;O75688-3;O75688-5;C9JIR6   | Protein XBP2                                                                                                     | PXM1B                       | CTSD/PBS | PXM1B     | not considered/background |              |              | 0 |
| 1190 | O75695                            | Protein XBP2                                                                                                     | RP2                         | CTSD/PBS | RP2       | not considered/background |              | -0.253989266 | 1 |
| 1191 | O75746;O75746-2;F8WUJ0;HOYF82;B   | Calcium-binding mitochondrial carrier protein Aralar1                                                            | SLC25A12                    | CTSD/PBS | SLC25A12  | not considered/background | 0.157431827  | 0.104526747  | 2 |
| 1192 | O75781-2;O75781;A0A087WW4;A0      | Paralemin-1                                                                                                      | PALM                        | CTSD/PBS | PALM      | not considered/background | 0.238909117  | 0.099216255  | 2 |
| 1193 | O75822-2;O75822-3;O75822          | Eukaryotic translation initiation factor 3 subunit J                                                             | EIF3J                       | CTSD/PBS | EIF3J     | not considered/background |              |              | 0 |
| 1194 | O75844;A0A6Q8PH69                 | CAAX prenyl protease 1 homolog                                                                                   | ZMPSTE24                    | CTSD/PBS | ZMPSTE24  | not considered/background | -0.26650682  | -0.123268887 | 2 |
| 1195 | O75874;C9J4I6;C9JLU6;C9JUE5       | Isocitrate dehydrogenase [NADP] cytoplasmic                                                                      | IDH1                        | CTSD/PBS | IDH1      | not considered/background | 0.087327052  | 0.1845418    | 2 |
| 1196 | O75882-2;O75882-2;O75882          | Attractin                                                                                                        | ATRN                        | CTSD/PBS | ATRN      | not considered/background |              | 0.06865524   | 1 |
| 1197 | O75899;A0A189A60                  | Gamma-aminobutyric acid B receptor subunit 2                                                                     | GABBR2                      | CTSD/PBS | GABBR2    | not considered/background | -0.036092919 | -0.231735438 | 2 |
| 1198 | O75914-2;O75914-2;O75914-4;O75914 | Serine/threonine-protein kinase PAK 3;Non-specific serine/threonine protein kinase                               | PAK3                        | CTSD/PBS | PAK3      | not considered/background | -0.088208727 | -0.261711329 | 2 |
| 1199 | O75915;F8W9F0;C9JLU6;F8WF33       | PRA1 family protein 3                                                                                            | ARL6IP5                     | CTSD/PBS | ARL6IP5   | not considered/background | 0.038928155  | -0.016924144 | 2 |
| 1200 | O75935-3;O75935;X6RCK5;X6RA56;A   | Dynactin subunit 3                                                                                               | CTCN3                       | CTSD/PBS | CTCN3     | not considered/background | 0.09936254   |              | 1 |
| 1201 | O75947;O75947-2;F5H608            | ATP synthase subunit d, mitochondrial                                                                            | ATP5H                       | CTSD/PBS | ATP5H     | not considered/background | 0.200880954  | 0.247148668  | 2 |
| 1202 | O75962-5;O75962-2;O75962;E7EWP2   | Triple functional domain protein                                                                                 | TRIO                        | CTSD/PBS | TRIO      | not considered/background | -0.038184078 | 0.304718805  | 2 |
| 1203 | O75964;E9P1M1;A0A383T1X4;A0A383   | ATP synthase subunit g, mitochondrial                                                                            | ATP5L                       | CTSD/PBS | ATP5L     | not considered/background | 0.131040121  | 0.251865128  | 2 |
| 1204 | O75973;O5VWV1-2;O5VWV1-2;O5VWV1   | Complement C1q-like protein 3;Complement C1q-like protein 2                                                      | C1QL1;C1QL3;C1QL2           | CTSD/PBS | C1QL1     | not considered/background |              |              | 0 |
| 1205 | O75976;O75976-2;J3QJ44;J3QJR9     | Carboxypeptidase D                                                                                               | CPD                         | CTSD/PBS | CPD       | not considered/background | -0.096483482 | 0.366819917  | 2 |
| 1206 | O76003                            | Glutaredoxin-3                                                                                                   | GLRX3                       | CTSD/PBS | GLRX3     | not considered/background | -0.35900896  | -0.160533009 | 2 |
| 1207 | O76031                            | ATP-dependent Clp protease ATP-binding subunit clpX-like, mitochondrial                                          | CLPX                        | CTSD/PBS | CLPX      | not considered/background |              |              | 0 |
| 1208 | O76041-2;A0A6Q8PF21;O76041;HOY2   | Nebulette                                                                                                        | NEBL                        | CTSD/PBS | NEBL      | not considered/background | 0.139600465  | -0.390997784 | 2 |
| 1209 | O76062;HOYNE6;E9P518;E9P159;O76   | Delta(1)-sterol reductase                                                                                        | TM7SF2                      | CTSD/PBS | TM7SF2    | not considered/background | 0.028710586  |              | 0 |
| 1210 | O76070;F8W754                     | Gamma-synuclein                                                                                                  | SNCG                        | CTSD/PBS | SNCG      | not considered/background | -0.286848999 | -0.488000771 | 2 |
| 1211 | O76094-2;O76094;D6D96;R4GNC1      | Signal recognition particle subunit SRP72                                                                        | SRP72                       | CTSD/PBS | SRP72     | not considered/background |              |              | 1 |
| 1212 | O94760;O94760-2;B4D0P1            | NI(G),NI(G)-dimethylarginine dimethylaminohydrolase 1                                                            | DDAH1                       | CTSD/PBS | DDAH1     | not considered/background | -0.36481212  | -0.329525485 | 2 |
| 1213 | O94766-2;O94766-2;G3V150;E9PNA1   | Galactosyl(galactosyl)xylosyl protein 3-beta-glucuronosyltransferase 3                                           | B3GAT3                      | CTSD/PBS | B3GAT3    | not considered/background | 0.248899107  |              | 0 |
| 1214 | O94772;O94772-2                   | Lymphocyte antigen 6H                                                                                            | LY6H                        | CTSD/PBS | LY6H      | not considered/background |              | -0.04949137  | 1 |
| 1215 | O94811                            | Tubulin polymerization-promoting protein                                                                         | TPPP                        | CTSD/PBS | TPPP      | not considered/background | -0.196905251 | 0.179138919  | 2 |
| 1216 | O94819                            | Kelch repeat and BTB domain-containing protein 11                                                                | KBTBD11                     | CTSD/PBS | KBTBD11   | not considered/background |              |              | 0 |
| 1217 | O94826                            | Mitochondrial import receptor subunit TOM70                                                                      | TOMM70A                     | CTSD/PBS | TOMM70A   | not considered/background | 0.147306699  | 0.216752903  | 2 |
| 1218 | O94830;E9PFI5;HOYF30;E9PKKE6;O948 | Phospholipase DDH2                                                                                               | DDH2                        | CTSD/PBS | DDH2      | not considered/background |              |              | 0 |
| 1219 | O94874;O94874-3;O94874-2          | EF URM1-protein ligase 1                                                                                         | UFL1                        | CTSD/PBS | UFL1      | not considered/background | 0.045023522  | -0.192067884 | 2 |
| 1220 | O94903;E5RKF7;E5RKG77;HOYBG2      | Proline synthase co-transcribed bacterial homolog protein                                                        | PROSC                       | CTSD/PBS | PROSC     | not considered/background | 0.027578727  | -0.224657734 | 2 |
| 1221 | O94905;E5RHW4;E5RJ09;O94905-2;E   | Erln-2                                                                                                           | ERLIN2                      | CTSD/PBS | ERLIN2    | not considered/background | 0.236951759  | 0.043809663  | 2 |
| 1222 | O94910-2;O94910;K7ERC3;K7EK47;K   | Lathropilin-1                                                                                                    | LPHN1                       | CTSD/PBS | LPHN1     | not considered/background | -0.074198016 | -0.184555731 | 2 |
| 1223 | O94919                            | Endonuclease domain-containing 1 protein                                                                         | ENDOD1                      | CTSD/PBS | ENDOD1    | not considered/background | -0.00323202  |              | 1 |
| 1224 | O94925;B7Z509;H7BZD1;C9JUI6;O949  | Glutamine kidney isoform, mitochondrial                                                                          | GLS                         | CTSD/PBS | GLS       | not considered/background | -0.019843053 | 0.076904078  | 2 |
| 1226 | O94967-2;O94967;O94967-3;O94967   | WD repeat-containing protein 47                                                                                  | WDR47                       | CTSD/PBS | WDR47     | not considered/background | -0.107585597 | 0.148065106  | 2 |
| 1228 | O94973-2;O94973-2;A0A0G21QM1      | AP-2 complex subunit alpha-2                                                                                     | AP2A2                       | CTSD/PBS | AP2A2     | not considered/background | -0.132087787 | -0.08841301  | 2 |
| 1229 | O5SR54;O94985-2;O94985            | Calsynenin-1;Soluble Alc-alpha1;CTF1-alpha                                                                       | CLSTN1                      | CTSD/PBS | CLSTN1    | not considered/background |              |              | 0 |
| 1230 | O95057;K7EN06                     | GTP-binding protein Di-Ras1                                                                                      | DIRA51                      | CTSD/PBS | DIRA51    | not considered/background | 0.03083043   | -0.359858472 | 2 |
| 1231 | O95139;A0A087W2X2;O95139-2        | NADH dehydrogenase [ubiquinone] 1 beta subcomplex subunit 6                                                      | NDUF86                      | CTSD/PBS | NDUF86    | not considered/background | -0.33822472  |              | 1 |
| 1232 | S4R315;O95167                     | NADH dehydrogenase [ubiquinone] 1 alpha subcomplex subunit 3                                                     | NDUF43                      | CTSD/PBS | NDUF43    | not considered/background |              |              | 0 |
| 1233 | O95168-2;O95168;F2Z3P9;C9JXO9     | NADH dehydrogenase [ubiquinone] 1 beta subcomplex subunit 4                                                      | NDUF84                      | CTSD/PBS | NDUF84    | not considered/background | 0.012068023  | 0.029956249  | 2 |
| 1234 | O95169-2;O95169;K9J172;E9PGB6;O9  | NADH dehydrogenase [ubiquinone] 1 beta subcomplex subunit 5, mitochondrial                                       | NDUF88                      | CTSD/PBS | NDUF88    | not considered/background |              |              | 0 |
| 1235 | O95182;M0R0N0;M0R1U9              | NADH dehydrogenase [ubiquinone] 1 alpha subcomplex subunit 7                                                     | NDUF7                       | CTSD/PBS | NDUF7     | not considered/background |              |              | 0 |
| 1236 | O95196;A0A087WU18;O95196-2;O9519  | Chondroitin sulfate proteoglycan 5                                                                               | CSPG5                       | CTSD/PBS | CSPG5     | not considered/background |              | -0.349478515 | 1 |
| 1237 | O95197-7;O95197-2;O95197;O95197   | Reticulon-3                                                                                                      | RTN3                        | CTSD/PBS | RTN3      | not considered/background | 0.156267163  | -0.285934808 | 2 |
| 1239 | O95202;O952                       |                                                                                                                  |                             |          |           |                           |              |              |   |

|      |                                   |                                                                                              |             |          |         |                           |              |              |   |
|------|-----------------------------------|----------------------------------------------------------------------------------------------|-------------|----------|---------|---------------------------|--------------|--------------|---|
| 1285 | P00414                            | Cytochrome c oxidase subunit 3                                                               | MT-CO3      | CTSD/PBS | MT-CO3  | not considered/background |              |              | 0 |
| 1286 | P00441;H78YH4                     | Superoxide dismutase [Cu-Zn]                                                                 | SDO1        | CTSD/PBS | SDO1    | not considered/background | -0.188660503 | -0.040261223 | 2 |
| 1287 | P00491;G3V2H3;G3V5M2              | Purine nucleoside phosphorylase                                                              | PNP         | CTSD/PBS | PNP     | not considered/background |              |              | 0 |
| 1288 | P00492;G29R61;G29R61              | Hypoxanthine guanine phosphoribosyltransferase                                               | HPRT1       | CTSD/PBS | HPRT1   | not considered/background | 0.08106688   | -0.077242999 | 0 |
| 1289 | P00505;P00505-2                   | Aspartate aminotransferase, mitochondrial                                                    | GOT2        | CTSD/PBS | GOT2    | not considered/background | 0.325040955  | 0.261621257  | 2 |
| 1290 | P00558;P00558-2                   | Phosphoglycerate kinase 1                                                                    | PGK1        | CTSD/PBS | PGK1    | not considered/background | -0.367843481 | -0.32998465  | 2 |
| 1291 | Q5T987;P00568;HOYMD2              | Adenylate kinase isoenzyme 1                                                                 | AK1         | CTSD/PBS | AK1     | not considered/background | 0.004896843  | -0.139731422 | 2 |
| 1292 | P00846                            | ATP synthase subunit a                                                                       | MT-ATP6     | CTSD/PBS | MT-ATP6 | not considered/background | 0.063640993  | -0.146003451 | 2 |
| 1293 | P00966;Q5T6L6;Q5T6L5              | Argininosuccinate synthase                                                                   | ASS1        | CTSD/PBS | ASS1    | not considered/background | -0.191376065 | -0.283092058 | 2 |
| 1294 | P10123;HOYH11                     | Alpha-2-macroglobulin                                                                        | A2M         | CTSD/PBS | A2M     | not considered/background | 0.28000678   | 0.317408725  | 2 |
| 1295 | P01111;P01111-2                   | GTPase HRas;GTPase HRas, N-terminally processed                                              | HRAS        | CTSD/PBS | HRAS    | not considered/background | -0.08195541  | -0.195417177 | 2 |
| 1296 | P01116-2;P01116;G3V4K2;G3V5T7     | GTPase KRas;GTPase KRas, N-terminally processed                                              | KRAS        | CTSD/PBS | KRAS    | not considered/background | 0.239520247  | 0.056296172  | 2 |
| 1298 | P02511;E9P117;E9PRA8;E9PS12;AOA0  | Alpha-crystallin B chain                                                                     | CRYAB       | CTSD/PBS | CRYAB   | not considered/background | -0.349977059 | -0.478091687 | 2 |
| 1299 | P02649;HOY7L5                     | Apolipoprotein E                                                                             | APOE        | CTSD/PBS | APOE    | not considered/background |              |              | 0 |
| 1300 | P02786;G3V0E5;F8WBE5;H7C3V5;Q9I   | Transferrin receptor protein 1;Transferrin receptor protein 1, serum form                    | TFRC        | CTSD/PBS | TFRC    | not considered/background | -0.416519427 | -0.478402378 | 2 |
| 1301 | P02787;H7C5E8;C9IUVG0;CON_Q2HJ    | Serotransferrin                                                                              | TF          | CTSD/PBS | TF      | not considered/background | -0.579921884 | -0.412076939 | 2 |
| 1302 | P02792                            | Ferritin light chain                                                                         | FTL         | CTSD/PBS | FTL     | not considered/background | 0.469052421  | 0.678395105  | 2 |
| 1303 | P02794;G3V192;G3V101;E9PKR8;E9P   | Ferritin heavy chain;Ferritin heavy chain, N-terminally processed;Ferritin                   | FTH1        | CTSD/PBS | FTH1    | not considered/background | 0.135950465  | 0.4447740986 | 2 |
| 1304 | P03866                            | NADH-ubiquinone oxidoreductase chain 1                                                       | MT-ND1      | CTSD/PBS | MT-ND1  | not considered/background | -0.5338854   |              | 1 |
| 1305 | P03905                            | NADH-ubiquinone oxidoreductase chain 4                                                       | MT-ND4      | CTSD/PBS | MT-ND4  | not considered/background | -0.202721342 |              | 1 |
| 1308 | P04066                            | Tissue alpha-L-fucosidase                                                                    | FUCA1       | CTSD/PBS | FUCA1   | Lyosomal enzymes          | 0.119953718  | -0.030265443 | 2 |
| 1309 | P04075;P04075-2;J3KP35;H3BQN4;H   | Fructose-bisphosphate aldolase A;Fructose-bisphosphate aldolase                              | ALDOA       | CTSD/PBS | ALDOA   | not considered/background | -0.124062704 | -0.164400135 | 2 |
| 1310 | P04080;AOA1W2PQ66;AOA1W2P552      | Cystatin-B                                                                                   | CSTB        | CTSD/PBS | CSTB    | not considered/background | -0.033111841 | -0.105946212 | 2 |
| 1311 | P04083;Q5T3N1;Q5T3N0              | Annexin A1;Annexin                                                                           | ANXA1       | CTSD/PBS | ANXA1   | not considered/background | -0.752072487 | -0.479644475 | 2 |
| 1312 | P04179-3;P04179;P04179-2;F5H3C5   | Superoxide dismutase [Mn], mitochondrial                                                     | SOD2        | CTSD/PBS | SOD2    | not considered/background | -0.050248446 | 0.116884289  | 2 |
| 1313 | P04181;P04181-2                   | Ornithine aminotransferase, mitochondrial;Ornithine aminotransferase, hepatic form;Ornithine | OTAT        | CTSD/PBS | OTAT    | not considered/background | 0.498046578  | 0.327963955  | 2 |
| 1314 | P04259                            | Keratin, type II cytoskeletal 6B                                                             | KRT6B       | CTSD/PBS | KRT6B   | not considered/background |              |              | 0 |
| 1316 | P04350;MOQY85;MOR2D3;MOR278;N     | Tubulin beta-4A chain                                                                        | TUBB4A      | CTSD/PBS | TUBB4A  | not considered/background | -0.308573036 | -0.259302621 | 2 |
| 1317 | P04406;P04406-2;E7EUT5;O1A556     | Glyceraldehyde-3-phosphate dehydrogenase                                                     | GAPDH       | CTSD/PBS | GAPDH   | not considered/background | -0.223205369 | -0.245982361 | 2 |
| 1318 | P04483;B7Z4L4;F8WF32              | Dolichyl-diphosphooligosaccharide-protein glycosyltransferase subunit 1                      | RPN1        | CTSD/PBS | RPN1    | not considered/background | 0.032510596  | 0.089712494  | 2 |
| 1319 | P04844;P04844-2;Q5Y1R7;Q5Y1R3;H0  | Dolichyl-diphosphooligosaccharide-protein glycosyltransferase subunit 2                      | RPN2        | CTSD/PBS | RPN2    | not considered/background | 0.124113331  | 0.30909192   | 2 |
| 1320 | P04899;P04899-6;P07093-3;P04899   | Guanine nucleotide-binding protein (G <i>i</i> ) subunit alpha-2                             | GNAI2       | CTSD/PBS | GNAI2   | not considered/background | -0.14850705  | -0.014640947 | 2 |
| 1321 | P05023-4;P05023-3;P05023-2;E5R555 | Sodium/potassium transporting ATPase subunit alpha-1                                         | ATP1A1      | CTSD/PBS | ATP1A1  | not considered/background | -0.031881231 | -0.017494373 | 2 |
| 1322 | P05026;P05026-2;V9VG72            | Sodium/potassium-transporting ATPase subunit beta-1                                          | ATP1B1      | CTSD/PBS | ATP1B1  | not considered/background | -0.001400993 | -0.038155201 | 2 |
| 1323 | P05060;AOA00AMT66                 | Secretogranin-1;PE-11;GAWK peptide;CCB peptide                                               | CHGB        | CTSD/PBS | CHGB    | not considered/background |              |              | 0 |
| 1324 | P05091;P05091-2;F8BVP50;S4R354;O9 | Aldehyde dehydrogenase, mitochondrial                                                        | ALDH2       | CTSD/PBS | ALDH2   | not considered/background | 0.340847077  | 0.233626438  | 2 |
| 1325 | P05109                            | Protein S100-A8;Protein S100-A8, N-terminally processed                                      | S100A8      | CTSD/PBS | S100A8  | not considered/background |              |              | 0 |
| 1326 | P05141                            | ADP/ATP translocase 2;ADP/ATP translocase 2, N-terminally processed                          | SLC25A5     | CTSD/PBS | SLC25A5 | not considered/background | 0.10017032   | 0.024575246  | 2 |
| 1327 | P05165-2;P05165;Q5V165-3;AOA1B0   | Propionyl-CoA carboxylase alpha chain, mitochondrial                                         | PCCA        | CTSD/PBS | PCCA    | not considered/background | 0.385486259  | 0.122711203  | 2 |
| 1328 | P05198;HOYD14;E5RG14              | Eukaryotic translation initiation factor 2 subunit 1                                         | EIF2S1      | CTSD/PBS | EIF2S1  | not considered/background | -0.169306579 | -0.184477307 | 2 |
| 1330 | P05387;HOYD08                     | Golgi vesicular trafficking protein P2                                                       | RPLP2       | CTSD/PBS | RPLP2   | not considered/background |              |              | 0 |
| 1331 | P05388;P05388-2;F8BWS0;F8BVC6;F5  | 60S acidic ribosomal protein P0;60S acidic ribosomal protein P0-like                         | RPLP0       | CTSD/PBS | RPLP0   | not considered/background | -0.152548215 | 0.0959587199 | 2 |
| 1332 | P05413;S4R371;S4R342              | Fatty acid-binding protein, heart                                                            | FABP3       | CTSD/PBS | FABP3   | not considered/background | -0.914983327 | -0.770194755 | 2 |
| 1333 | P05455                            | Lupus La protein                                                                             | SSB         | CTSD/PBS | SSB     | not considered/background |              |              | 0 |
| 1334 | P05556;P05556-2;P05556-5;P05556-6 | Integrin beta-1                                                                              | ITGB1       | CTSD/PBS | ITGB1   | not considered/background | -0.143946539 | -0.021479727 | 2 |
| 1335 | P05771;P05771-2;J3L130;H38        | Protein kinase C beta type                                                                   | PRKCB       | CTSD/PBS | PRKCB   | not considered/background |              |              | 0 |
| 1336 | P05937;P05937-2;E5R628;E5RG14     | Calbindin D9k                                                                                | CALB1       | CTSD/PBS | CALB1   | not considered/background | 0.058524312  | 0.523395308  | 2 |
| 1337 | P06241;P06241-3;P06241-2;E5R555   | Tyrosine protein kinase Fyn                                                                  | PRP2        | CTSD/PBS | PRP2    | not considered/background | -0.159814757 | -0.175301094 | 2 |
| 1338 | P06576;HOYH81;F8W079;F8W0P7;HC    | ATP synthase subunit beta, mitochondrial;ATP synthase subunit beta                           | ATP5B       | CTSD/PBS | ATP5B   | not considered/background | 0.190048587  | 0.264425835  | 2 |
| 1341 | P06733;AOA28R6G66;P06733-2;K7E9   | Alpha-enolase                                                                                | ENO1        | CTSD/PBS | ENO1    | not considered/background | -0.174816808 | -0.223793216 | 2 |
| 1342 | P06748-3;P06748-2;P06748;E5RGW4   | Nucleophosmin                                                                                | NPM1        | CTSD/PBS | NPM1    | not considered/background | -0.314302003 | 0.004022171  | 2 |
| 1343 | P06753-5;P06753-4;P06753-3;P06753 | Tropomyosin alpha-3 chain                                                                    | TPM3        | CTSD/PBS | TPM3    | not considered/background | 0.068464451  | -0.088141597 | 2 |
| 1344 | P06756-3;P06756-2;P06756          | Integrin alpha-V;Integrin alpha-V heavy chain;Integrin alpha-V light chain                   | ITGAV       | CTSD/PBS | ITGAV   | not considered/background |              |              | 0 |
| 1345 | P07093-3;P07093-2;P07093-3        | Glucocorticoid inducible protein 2                                                           | SGPHE2      | CTSD/PBS | SGPHE2  | not considered/background |              |              | 0 |
| 1348 | P07099;B1AC9B;B1A0Q9              | Epoxydehydratase 1                                                                           | EPHX1       | CTSD/PBS | EPHX1   | not considered/background | -0.269633938 | -0.425244442 | 2 |
| 1349 | P07101-3;P07101-4;P07101-2;P0710  | Tyrosine 3-monooxygenase                                                                     | TH          | CTSD/PBS | TH      | not considered/background | -0.002411315 | 0.153606979  | 2 |
| 1350 | P07196                            | Neurofilament light polypeptide                                                              | NEFL        | CTSD/PBS | NEFL    | not considered/background | -0.564200746 | -0.683651545 | 2 |
| 1352 | P07237;H7B294;HOY373;J3L398;J3L3  | Protein disulfide-isomerase                                                                  | P4HB        | CTSD/PBS | P4HB    | not considered/background | 0.072768173  | 0.083294071  | 2 |
| 1353 | P07305;P07305-2                   | Histone H1.0;Histone H1.0, N-terminally processed                                            | H1FO        | CTSD/PBS | H1FO    | not considered/background | 1.052902927  | 0.846687534  | 2 |
| 1354 | P07355;P07355-2;HOYH42;HOYMU9;I   | Annexin A2;Annexin;Putative annexin A2-like protein                                          | ANXA2       | CTSD/PBS | ANXA2   | not considered/background | 0.325593586  | -0.276079728 | 2 |
| 1355 | P07844;E9P137;E9PRM1;E9P137       | Catalytic subunit                                                                            | CAPN1       | CTSD/PBS | CAPN1   | not considered/background | -0.696026418 | -0.325846898 | 2 |
| 1356 | Q5P163;P07149;Q5S7B1;A6M422       | Tubulin beta chain                                                                           | TUBB        | CTSD/PBS | TUBB    | not considered/background | -0.427362352 | -0.063271393 | 2 |
| 1357 | P07686;Q5UHX0;HOYV83;HOY9B6;D6I   | Beta-hexosaminidase subunit beta;Beta-hexosaminidase subunit beta chain B;Beta-hexosaminid   | HEXB        | CTSD/PBS | HEXB    | not considered/background | 0.012497163  | 0.073013812  | 2 |
| 1359 | P07737;K7E144;CON_Q02584;J3L3D2   | Profilin-1                                                                                   | PFN1        | CTSD/PBS | PFN1    | not considered/background | -0.233158933 | -0.371477033 | 2 |
| 1360 | P07814;V9G262;V9G276              | Bifunctional glutamate/proline-tRNA ligase;Glutamate-tRNA ligase;Proline-tRNA ligase         | EPRS        | CTSD/PBS | EPRS    | not considered/background | 0.148348405  | 0.288135106  | 2 |
| 1361 | P07858;R4GQM5;E9PR54;E9JP67;E9P   | Cathepsin B;Cathepsin B light chain;Cathepsin B heavy chain                                  | CTSB        | CTSD/PBS | CTSB    | Lyosomal enzymes          | 0.10057404   | -0.169788212 | 2 |
| 1362 | P07900;P07900-2;G3V2I8;Q5BFG0;D0  | Heat shock protein HSP 90-alpha                                                              | HS90AA1     | CTSD/PBS | HS90AA1 | not considered/background | -0.112817898 | -0.088820033 | 2 |
| 1363 | P07919;AOA09HLP55                 | Cytochrome b-c1 complex subunit 6, mitochondrial                                             | UQCRC       | CTSD/PBS | UQCRC   | not considered/background | 0.754002929  | 0.275227508  | 2 |
| 1364 | P07954-2;P07954-3;P07954-2        | Fumarate hydratase, mitochondrial                                                            | FH          | CTSD/PBS | FH      | not considered/background | 0.182438047  | -0.175301094 | 2 |
| 1365 | P08133;P08133-2;E7ZFC6;ESRJF5;E5  | Annexin A6;Annexin                                                                           | ANXA6       | CTSD/PBS | ANXA6   | not considered/background | -0.557051198 | -0.527871054 | 2 |
| 1366 | P08237;AOA28R6Y81;P08237-3;P082   | ATP-dependent 6-phosphofructokinase, muscle type                                             | PFKM        | CTSD/PBS | PFKM    | not considered/background | -0.202937203 | -0.138290234 | 2 |
| 1367 | P08238;Q5R8F7                     | Heat shock protein HSP 90-beta                                                               | HS90AB1     | CTSD/PBS | HS90AB1 | not considered/background | -0.108705256 | -0.218843151 | 2 |
| 1368 | P08240;P08240-2                   | Signal recognition particle receptor subunit alpha                                           | SRPR        | CTSD/PBS | SRPR    | not considered/background | -0.009350043 | 0.199006943  | 2 |
| 1369 | P08243-2;P08243-3;C9JLNG;C9JMO9;C | Asparagine synthetase [glutamine-hydrolyzing]                                                | ASN         | CTSD/PBS | ASN     | not considered/background |              |              | 0 |
| 1370 | P08247;H7CAW3;G5E9A2;F2Z3E1;P08   | Synaptophysin                                                                                | SYNP        | CTSD/PBS | SYNP    | not considered/background | 0.038717108  | -0.21896711  | 2 |
| 1371 | P08559;P08559-3;P08559-2;P08559   | Pyruvate dehydrogenase E1 component subunit alpha, somatic form, mitochondrial               | PDH4A1      | CTSD/PBS | PDH4A1  | not considered/background | 0.403049529  | -0.192488082 | 2 |
| 1372 | P08574                            | Cytochrome c1, heme protein, mitochondrial                                                   | CYC1        | CTSD/PBS | CYC1    | not considered/background | 0.180147861  | 0.233260682  | 2 |
| 1373 | P08670;BOYIC4;BOYIC5;AOA1B0G7S5   | Vimentin                                                                                     | VIM         | CTSD/PBS | VIM     | not considered/background | -0.50686102  | -0.564329387 | 2 |
| 1374 | P08754                            | Guanine nucleotide-binding protein G(k) subunit alpha                                        | GNAI3       | CTSD/PBS | GNAI3   | not considered/background | -0.21594837  | -0.014926544 | 2 |
| 1375 | P08758;D6R689;D6RBL5;E9PHT9;D6R   | Annexin A5;Annexin                                                                           | ANXA5       | CTSD/PBS | ANXA5   | not considered/background | -0.24694321  | -0.333423734 | 2 |
| 1376 | P09104;P09104-2;F5H0C8;F5H1C3;P3  | Alpha-enolase;Enolase                                                                        | ENO2        | CTSD/PBS | ENO2    | not considered/background | -0.222818079 | -0.092207438 | 2 |
| 1377 | P09110;C9IDE9;H7C131;P09110-2;H4  | 3-ketocacyl-CoA lyase, peroxisomal                                                           | ACAA1       | CTSD/PBS | ACAA1   | not considered/background | -0.192381295 | -0.004753055 | 2 |
| 1378 | P09211;A8M0X9;AOA087Z2E9;AOA08    | Glutathione S-transferase P                                                                  | GSTP1       | CTSD/PBS | GSTP1   | not considered/background | -0.226864487 | -0.132409483 | 2 |
| 1379 | P09382;F8W67                      | Galectin-1                                                                                   | LGALS1      | CTSD/PBS | LGALS1  | not considered/background | -0.205097599 | 0.674912553  | 2 |
| 1380 | P09417;P09417-2;B7Z415;D6RG67;D   | Dihydropyridine reductase                                                                    | QDPR        | CTSD/PBS | QDPR    | not considered/background | -0.185359135 | 0.130997235  | 2 |
| 1381 | Q57774;P09429;B2RKP0;P23497       | High mobility group protein B1;Putative high mobility group protein B1-like 1                | HMG81       | CTSD/PBS | HMG81   | not considered/background | 0.244765308  | -0.103933991 | 2 |
| 1382 | P09471;H3B7M2;AOA1W2P38;AOA1      | Guanine nucleotide-binding protein G(o) subunit alpha                                        | GNAO1       | CTSD/PBS | GNAO1   | not considered/background | -0.007768149 | -0.036309112 | 2 |
| 1383 | P09497;P09497-2;D6RDI1;HOY9Q6     | Clastrin light chain 8                                                                       | CLTB        | CTSD/PBS | CLTB    | not considered/background | -0.014339276 | 0.049337498  | 2 |
| 1384 | P09543-2;P09543;K7E9C4;K7E96C;C2  | 3-cyclic-nucleotide-3-phosphodiesterase                                                      | CNP         | CTSD/PBS | CNP     | not considered/background | 0.196229329  | -0.083111227 | 2 |
| 1385 | P09622;E9P666;P09622-3;P09622-2;I | Dihydrolipoyl dehydrogenase, mitochondrial;Dihydrolipoyl dehydrogenase                       | DLD         | CTSD/PBS | DLD     | not considered/background | 0.194356366  | 0.373775823  | 2 |
| 1386 | P09669                            | Cytochrome c oxidase subunit 1                                                               | COWC        | CTSD/PBS | COWC    | not considered/background | -0.00771684  | -0.210388664 | 2 |
| 1387 | P09936;D6R883;D6R956;D6R974;D6I   | Ubiquitin carboxyl-terminal hydrolase isozyme L1;Ubiquitin carboxyl-terminal hydrolase       | UCHL1       | CTSD/PBS | UCHL1   | not considered/background | -0.0314742   | -0.040962548 | 2 |
| 1388 | P09960-4;P09960;P09960-3;P09960   | Leukotriene A-4 hydrolase                                                                    | LT4AH       | CTSD/PBS | LT4AH   | not considered/background | 0.121811151  |              | 1 |
| 1389 | P09972;A8MV29;J3K5V6;J3KQP5;A8I   | Fructose-bisphosphate aldolase C;Fructose-bisphosphate aldolase                              | ALDOC       | CTSD/PBS | ALDOC   | not considered/background | -0.105612927 | -0.190551652 | 2 |
| 1390 | Q71U09;P0C055;Q71U09-3;Q71U09-4   | Histone H2A.V;Histone H2A.Z;Histone H2A                                                      | H2AFV       | CTSD/PBS | H2AFV   | not considered/background | 0.12695766   |              | 1 |
| 1392 | P0D925;P0D924-2;P0D923;E7EHB3;Q9  | Ras-related protein Rap-2A                                                                   | CALM2;CALM1 | CTSD/PBS | CALM2   | not considered/background | 0.289008146  | -0.013212111 | 2 |
| 1393 | P10114;F6U784                     | Ras-related protein Rap-2A                                                                   | RAP2A       | CTSD/PBS | RAP2A   | not considered/background | -0.054437241 | -0.195105521 | 2 |
| 1394 | P10155-5;P10155-4;P10155-3;P1015  | 70 kDa Ss-A10 ribonuclease                                                                   | TROVE2      | CTSD/PBS | TROVE2  | not considered/background | 0.09437121   | -0.124049767 | 2 |
| 1395 | P10253;J3L131;J3L0U5;J3L2V9       | Lyosomal alpha-glucosidase;70 kDa lyosomal alpha-glucosidase                                 | GAA         | CTSD/PBS | G       |                           |              |              |   |



|      |                                  |                                                                                                     |                            |          |           |                           |               |              |   |
|------|----------------------------------|-----------------------------------------------------------------------------------------------------|----------------------------|----------|-----------|---------------------------|---------------|--------------|---|
| 1444 | P13807-2;P13807                  | Glycogen [starch] synthase, muscle                                                                  | GYS1                       | CTSD/PBS | GYS1      | not considered/background | -0.07322629   | -0.167614841 | 0 |
| 1445 | P13861;P13861-2;H07C10;H7C330;H  | cAMP-dependent protein kinase type II-alpha regulatory subunit                                      | PRKAR2A                    | CTSD/PBS | PRKAR2A   | not considered/background | -0.07322629   | -0.167614841 | 2 |
| 1446 | P14174                           | Macrophage migration inhibitory factor                                                              | MF                         | CTSD/PBS | MF        | not considered/background | 0.06060083    | -0.545573056 | 2 |
| 1447 | P14324-3;P14324;A00807WWN4;A0A   | Farnesyl pyrophosphate synthase                                                                     | FPPS                       | CTSD/PBS | FPPS      | not considered/background | 0.274410789   | 0.009320812  | 2 |
| 1448 | P14415;J3L38;J3L1V9              | Sodium/potassium-transporting ATPase subunit beta-2                                                 | ATP1B2                     | CTSD/PBS | ATP1B2    | not considered/background | -0.070315031  | -0.335826224 | 2 |
| 1449 | P14550;Q5TG621;V9GYP;V9GVG2      | Alcohol dehydrogenase [NAD(P)+]                                                                     | AKR1A1                     | CTSD/PBS | AKR1A1    | not considered/background | -0.053942929  | -0.126179949 | 2 |
| 1450 | P14618;P14618-3;84DNK4;H3BUU1;P  | Pyruvate kinase PKM;Pyruvate kinase                                                                 | PKM                        | CTSD/PBS | PKM       | not considered/background | -0.190463822  | -0.43850578  | 2 |
| 1451 | P14618-2;H38TN5;H38R70;H38Q34    | Pyruvate kinase PKM;Pyruvate kinase                                                                 | PKM                        | CTSD/PBS | PKM       | not considered/background | -0.188857826  | -0.286999397 | 2 |
| 1452 | P14625;Q96GW1;A0A1W2PRR1;Q58I    | Endoplasmic                                                                                         | HS9P081                    | CTSD/PBS | HS9P081   | not considered/background | 0.171591153   | 0.158751429  | 2 |
| 1453 | P14854;A0A494C160                | Cytochrome c oxidase subunit 6B1                                                                    | COX6B1                     | CTSD/PBS | COX6B1    | not considered/background | -0.129197359  |              | 1 |
| 1454 | P14868;P14868-2;C9J753;C9J1C1    | Aspartate-N-acyltransferase                                                                         | DARS                       | CTSD/PBS | DARS      | not considered/background | 0.060877073   | 0.061465781  | 2 |
| 1455 | P14923;C9JTX4;C9J826;C9J1K18;C9J | Junction plakoglobin                                                                                | JUP                        | CTSD/PBS | JUP       | not considered/background |               | 0.201493205  | 1 |
| 1456 | P14927;P14927-2;B7Z2R2;E5RH69    | Chromochrome-b-c1 complex subunit 7                                                                 | UQC8B                      | CTSD/PBS | UQC8B     | not considered/background | -0.090342086  | 0.042783708  | 2 |
| 1457 | P15121;E9PCX2;E9PEF9;C9JR28;C9JR | Aldose reductase                                                                                    | AKR1B1                     | CTSD/PBS | AKR1B1    | not considered/background | -0.312545089  | -0.104470858 | 2 |
| 1458 | P15374;A0A087WTB8;Q5TBK7         | Ubiquitin carboxyl-terminal hydrolase isozyme L3;Ubiquitin carboxyl-terminal hydrolase              | UCHL3                      | CTSD/PBS | UCHL3     | not considered/background | 0.053528441   | 0.017052045  | 2 |
| 1460 | P15586;H7C3P4;P15586-2;F6S8M0;F  | N-acetylglucosamine-6-sulfatase                                                                     | GNS                        | CTSD/PBS | GNS       | not considered/background | -0.264339192  | -0.232415171 | 2 |
| 1461 | P15848;P15848-2;A0A2U5U034       | Arylsulfatase B                                                                                     | ARSB                       | CTSD/PBS | ARSB      | lysosomal enzymes         | 0.111164889   | 0.018249617  | 2 |
| 1462 | P15924-3;P15924-3;P15924         | Desmoplakin                                                                                         | DSP                        | CTSD/PBS | DSP       | not considered/background | 0.053528441   | -0.07545128  | 2 |
| 1463 | P16035;B4DPW2;K7EXK4;K7EL90      | Metalloproteinase inhibitor 2                                                                       | TIMP2                      | CTSD/PBS | TIMP2     | not considered/background | -0.044449123  | -0.077379741 | 2 |
| 1464 | P16219;E9PEB2                    | Short-chain specific acyl-CoA dehydrogenase, mitochondrial                                          | ACADS                      | CTSD/PBS | ACADS     | not considered/background | 0.084744621   | 0.531593936  | 2 |
| 1465 | P16278-3;P16278;P16278-2;E7EQ29  | Beta-galactosidase                                                                                  | GLB1                       | CTSD/PBS | GLB1      | lysosomal enzymes         | -0.30064382   | -0.234133396 | 2 |
| 1466 | P16298;P16298-4;Q5F2F8;P16298-2  | Serine/threonine-protein phosphatase 2B catalytic subunit beta isoform;Serine/threonine-protein     | PPP3CB                     | CTSD/PBS | PPP3CB    | not considered/background | -0.055576302  | -0.185486004 | 2 |
| 1467 | P16333;C9JOK5;E7ERP6;E9PEE2;C9KO | Cytosolic protein NCK1;Cytoplasmic protein NCK2                                                     | NCK1;NCK2                  | CTSD/PBS | NCK1      | not considered/background |               |              | 0 |
| 1468 | P16401                           | Histone H1.5                                                                                        | HIST1H18                   | CTSD/PBS | HIST1H18  | not considered/background |               | 0.454743272  | 2 |
| 1469 | P16403;P16412;P16402;Q0Z539;P22  | Histone H1.2;Histone H1.4;Histone H1.3                                                              | HIST1H1C;HIST1H1E;HIST1H1D | CTSD/PBS | HIST1H1C  | not considered/background | 0.40370401    | 0.302993134  | 2 |
| 1470 | P16415;H0V4R2;E7EMD05;E7EMU0     | NADPH-cytochrome P450 5A                                                                            | CYP5A1                     | CTSD/PBS | CYP5A1    | not considered/background | 0.118093888   | 0.017659484  | 2 |
| 1471 | P16615-3;P16615-2;P16615-5;P1661 | Sarcoplasmic/endoplasmic reticulum calcium ATPase 2                                                 | ATP2A2                     | CTSD/PBS | ATP2A2    | not considered/background | -0.036141209  | -0.225155933 | 2 |
| 1472 | P16870-2;P16870;D6RFR8;C9JEB8;D6 | Carboxypeptidase E                                                                                  | CPE                        | CTSD/PBS | CPE       | not considered/background | 0.161565256   | 0.146595121  | 2 |
| 1473 | P16949;P16949-2;A2A2D0;REV_P36   | Stathmin                                                                                            | STMN1                      | CTSD/PBS | STMN1     | not considered/background | 0.236217064   | 0.213320006  | 2 |
| 1474 | P17050                           | Alpha-N-acetylgalactosaminidase                                                                     | NAGA                       | CTSD/PBS | NAGA      | lysosomal enzymes         | 0.364236231   | 0.039844189  | 2 |
| 1476 | P17152                           | Transmembrane protein 11, mitochondrial                                                             | TMEM11                     | CTSD/PBS | TMEM11    | not considered/background |               | 0.283632397  | 1 |
| 1477 | P17174;P17174-2                  | Aspartate aminotransferase, cytoplasmic                                                             | GOT1                       | CTSD/PBS | GOT1      | not considered/background | -0.192331841  | -0.204391163 | 2 |
| 1478 | P17252;J3KRNS                    | Protein kinase C alpha type                                                                         | PRKC                       | CTSD/PBS | PRKCA     | not considered/background | -0.073545065  | -0.266516713 | 2 |
| 1480 | P17568                           | NADH dehydrogenase [ubiquinone] 1 beta subcomplex subunit 7                                         | NDUFB7                     | CTSD/PBS | NDUFB7    | not considered/background |               |              | 0 |
| 1481 | P17600;P17600-2;A0A1W2P500;A0A   | Synapsin-1                                                                                          | SYN1                       | CTSD/PBS | SYN1      | not considered/background | -0.158381059  | -0.205642742 | 2 |
| 1482 | P17612;P17612-2;Q15136;K7ERP6;K  | cAMP-dependent protein kinase catalytic subunit alpha                                               | PRKACA;KIN27               | CTSD/PBS | PRKACA    | not considered/background | -0.05072655   | -0.205017088 | 2 |
| 1483 | P17677;P17677-2                  | Neuromodulin                                                                                        | GNP43                      | CTSD/PBS | GNP43     | not considered/background | 0.120882733   | 0.119933605  | 2 |
| 1484 | P17858;P17858-2                  | ATP-dependent 6-phosphofructokinase, liver type                                                     | PFKL                       | CTSD/PBS | PFKL      | not considered/background | -0.125431208  | -0.490467444 | 2 |
| 1485 | P17900;H0Y9Y3;E5RDU0             | Ganglioside GM2 activator;Ganglioside GM2 activator isoform short                                   | GM2A                       | CTSD/PBS | GM2A      | not considered/background |               | 0.727876901  | 1 |
| 1487 | AGN3H3;P17805;P17805-2;E9PMD8;E  | Proteinase regulatory subunit 5A                                                                    | PRP3                       | CTSD/PBS | PRP3      | not considered/background | -0.167440027  | -0.010923689 | 2 |
| 1488 | P17987;E7ERF2;E7ERC6;F5G2T       | Complex protein 1 subunit alpha                                                                     | TCP1                       | CTSD/PBS | TCP1      | not considered/background | -0.087324808  | -0.109233689 | 2 |
| 1489 | P18065;C9JMY1;C9JW52;H7C1H0      | Insulin-like growth factor-binding protein 2                                                        | IGFBP2                     | CTSD/PBS | IGFBP2    | not considered/background | 0.012640181   | -0.054931619 | 2 |
| 1490 | P18077;Q9K025;F8W855;F8WB72      | 60S ribosomal protein L35a                                                                          | RPL35A                     | CTSD/PBS | RPL35A    | not considered/background | 0.213253951   | -0.01961365  | 2 |
| 1491 | P18085;C9JPM4;C9JAK5;U3KCF2      | ADP-ribosylation factor 4                                                                           | ARF4                       | CTSD/PBS | ARF4      | not considered/background | -0.226071171  |              | 1 |
| 1492 | P18124;A8MUD9;C9JUI5;C9JZ88      | 60S ribosomal protein L7                                                                            | RPL7                       | CTSD/PBS | RPL7      | not considered/background | 0.065985829   | 0.095595935  | 2 |
| 1493 | P18206-2;P18206;P18206-3;A0A096  | Vinculin                                                                                            | VCL                        | CTSD/PBS | VCL       | not considered/background | -0.221808284  | -0.195599575 | 2 |
| 1496 | P18659;P15259;Q8NDI7             | Phosphoglycerate mutase 1                                                                           | PGAM1                      | CTSD/PBS | PGAM1     | not considered/background | -0.295888164  | -0.017659484 | 2 |
| 1497 | P18827;E9PH45;H7C1K4             | Syndecan-1                                                                                          | SDC1                       | CTSD/PBS | SDC1      | not considered/background | -0.499463026  | 0.051399153  | 2 |
| 1498 | P19021-6;P19021;P19021-5;P19021  | Peptidyl-glycine alpha-aminating monooxygenase;Peptidyl-glycine alpha-hydroxylating monooxy         | PAM                        | CTSD/PBS | PAM       | not considered/background | 0.417271945   | 0.099896392  | 2 |
| 1499 | P19086                           | Guanine nucleotide-binding protein G(z) subunit alpha                                               | GNAZ                       | CTSD/PBS | GNAZ      | not considered/background | -0.103053953  | -0.07956585  | 2 |
| 1500 | P19338;H78Y16;C9JYW2;C9JL81;C9J1 | Nucleolin                                                                                           | NCL                        | CTSD/PBS | NCL       | not considered/background | -0.223559071  | 0.237115456  | 2 |
| 1501 | P19367;P19367-4;P19367-2;P19367  | Hexokinase-1                                                                                        | HK1                        | CTSD/PBS | HK1       | not considered/background | 0.100439479   | 0.100801163  | 2 |
| 1502 | P19623;H78Y16;K7EXM4             | Spermidine synthase                                                                                 | SRM                        | CTSD/PBS | SRM       | not considered/background |               |              | 0 |
| 1503 | P19634;B1A05;P19634-2            | Medulin/hydrolytic exchanger 1                                                                      | SLC9A1                     | CTSD/PBS | SLC9A1    | not considered/background | -0.05099793   |              | 2 |
| 1504 | P20020-4;P20020-1;P20020-6;P2002 | Plasma membrane calcium-transporting ATPase 1;Calcium-transporting ATPase                           | ATP2B1                     | CTSD/PBS | ATP2B1    | not considered/background | -0.094202419  | -0.019203734 | 2 |
| 1506 | P20073-2;P20073                  | Annexin A7                                                                                          | ANXA7                      | CTSD/PBS | ANXA7     | not considered/background |               | -0.325040955 | 1 |
| 1507 | P20336;S4R3Q3;MOR257             | Ras-related protein Rab-3A                                                                          | RAB3A                      | CTSD/PBS | RAB3A     | not considered/background | -0.022844657  | 0.06355181   | 2 |
| 1508 | P20337                           | Ras-related protein Rab-3B                                                                          | RAB3B                      | CTSD/PBS | RAB3B     | not considered/background | 0.190045887   | 0.168333505  | 2 |
| 1509 | P20338;A0A087WY75                | Ras-related protein Rab-4A                                                                          | RAB4A                      | CTSD/PBS | RAB4A     | not considered/background | -0.005550613  |              | 1 |
| 1510 | P20339-2;P20339;F8WCV6;F8        | Ras-related protein Rab-5A                                                                          | RAB5A                      | CTSD/PBS | RAB5A     | not considered/background | -0.010250611  | 0.074957633  | 2 |
| 1513 | P20618                           | Proteasome subunit beta type-1                                                                      | PSMB1                      | CTSD/PBS | PSMB1     | not considered/background | 0.012497163   | 0.035313042  | 2 |
| 1514 | P20645;F5G303;H0YF90;F5H4U1;H0V  | Unconjugated mannose-6-phosphate receptor                                                           | MANR                       | CTSD/PBS | MANR      | not considered/background | -0.210372192  | -0.019025784 | 2 |
| 1515 | P21266;A0A04DMT3                 | Glutathione S-transferase Mu 3                                                                      | GSTM3                      | CTSD/PBS | GSTM3     | not considered/background | -0.090372805  | 0.064449733  | 2 |
| 1516 | P21281;H0Y0C4;C9JL73;P15313;E5R  | V-type proton ATPase subunit B, brain isoform                                                       | ATP6V1B2                   | CTSD/PBS | ATP6V1B2  | not considered/background | -0.10869732   | -0.073134705 | 2 |
| 1517 | P21283;E7EV59                    | V-type proton ATPase subunit C1                                                                     | ATP6V1C1                   | CTSD/PBS | ATP6V1C1  | not considered/background | -0.083920868  | -0.10634832  | 2 |
| 1518 | P21291;E9PS42;E9PP21;E9PND2      | Cysteine and glycine-rich protein 1                                                                 | CSRP1                      | CTSD/PBS | CSRP1     | not considered/background | -0.079027073  | 0.001948954  | 2 |
| 1519 | P21333-2;P21333;Q6OF65;A0A087W   | Filamin-A                                                                                           | FLNA                       | CTSD/PBS | FLNA      | not considered/background | -0.588997736  | -0.481402283 | 2 |
| 1520 | P21399                           | Cytosolic aconitate hydratase                                                                       | ACO1                       | CTSD/PBS | ACO1      | not considered/background | -0.873000721  |              | 1 |
| 1521 | P21796;C9JIB7                    | Voltage-dependent anion-selective channel protein 1                                                 | VDAC1                      | CTSD/PBS | VDAC1     | not considered/background | 0.055167281   | 0.149344574  | 2 |
| 1522 | P21912;A0A087WWT1;A0A087WXX8     | Succinate dehydrogenase [ubiquinone] iron-sulfur subunit, mitochondrial                             | SDHB                       | CTSD/PBS | SDHB      | not considered/background | 0.179128829   | 0.152740659  | 2 |
| 1523 | P21953                           | 2-oxoisovalerate dehydrogenase subunit beta, mitochondrial                                          | BCKDHB                     | CTSD/PBS | BCKDHB    | not considered/background |               |              | 0 |
| 1524 | P21964-2;P21964;E7EM56;E7EUU8;F  | Catechol O-methyltransferase                                                                        | COMT                       | CTSD/PBS | COMT      | not considered/background | -0.328344301  | -0.133168933 | 2 |
| 1525 | P22033                           | Methylmalonyl-CoA mutase, mitochondrial                                                             | MUT                        | CTSD/PBS | MUT       | not considered/background | 0.311503115   | 0.240349856  | 2 |
| 1526 | P22059                           | Oxysterol-binding protein 1                                                                         | OSBP                       | CTSD/PBS | OSBP      | not considered/background |               | 0.071724438  | 1 |
| 1527 | P22102;P22102-2;C9JB1;C9JTV6;F8  | Trifunctional protein biosynthetic protein adenosine-3;Phosphoribosylamine-glycine ligase;Phor      | GART                       | CTSD/PBS | GART      | not considered/background | -0.074061328  | -0.221444053 | 2 |
| 1528 | P22234-3;P22234-2;P22234-1;P2223 | Metformin-activated phosphoribosyl-aminimidazole-succinocarboxamide synthase;Phor                   | PAICS                      | CTSD/PBS | PAICS     | not considered/background | -0.89509793   | 0.014088917  | 2 |
| 1529 | P22303;P22303-3;P22303-4;P22303  | Acetylcholinesterase;Carboxylic ester hydrolase                                                     | ACHE                       | CTSD/PBS | ACHE      | not considered/background | 0.566961422   | 0.207227922  | 2 |
| 1530 | P22304;B3KWA1;P22304-2;P22304-3  | Iduronate-2-sulfatase;Iduronate-2-sulfatase 42 kDa chain;Iduronate-2-sulfatase 14 kDa chain         | IDS                        | CTSD/PBS | IDS       | not considered/background | 0.082975027   |              | 1 |
| 1531 | P22307-4;P22307-7;P22307-8;P2230 | Non-specific lipid-transfer protein                                                                 | SCP2                       | CTSD/PBS | SCP2      | not considered/background | 0.079702372   | -0.140386032 | 2 |
| 1532 | P22314-2;P22314;Q5JRR6;Q5JRR9;Q  | Ubiquitin-like modifier-activating enzyme 1                                                         | UBA1                       | CTSD/PBS | UBA1      | not considered/background | -0.0572786192 | 0.017056456  | 2 |
| 1533 | P22392-2;Q3ZQ12;J3KPD9;P22392-2  | Nucleoside diphosphate kinase B;Nucleoside diphosphate kinase A                                     | NME2;NME1-NME2;NME1        | CTSD/PBS | NME2      | not considered/background | -0.13327895   | -0.07655426  | 2 |
| 1535 | P22626;P22626-2;A0A087WU12       | Heterogeneous nuclear ribonucleoproteins A2/B1                                                      | HNRNPA2B1                  | CTSD/PBS | HNRNPA2B1 | not considered/background | 0.07231164    | -0.030547964 | 2 |
| 1536 | P22676;H38M5                     | Calreticulin                                                                                        | CALR                       | CTSD/PBS | CALR      | not considered/background | 0.228234401   | 0.02068913   | 2 |
| 1537 | P22694;P22694-2;P22694-3;P22694  | cAMP-dependent protein kinase catalytic subunit beta                                                | PRKCB                      | CTSD/PBS | PRKCB     | not considered/background | -0.415152919  | -0.528671329 | 2 |
| 1538 | P22695;H38RG4;H38B94;H38BP04;H3E | Cytochrome b-c1 complex subunit 2, mitochondrial                                                    | UQCRC2                     | CTSD/PBS | UQCRC2    | not considered/background | 0.249263286   | 0.031061395  | 2 |
| 1539 | P23229-4;P23229-2;P23229-5;P2322 | Integrin alpha-6;Integrin alpha-6 heavy chain;Integrin alpha-6 light chain;Processed integrin alpha | ITGA6                      | CTSD/PBS | ITGA6     | not considered/background |               |              | 0 |
| 1540 | P23246;P23246-2;P23246-7         | Splicing factor, proline- and glutamine-rich                                                        | SFPQ                       | CTSD/PBS | SFPQ      | not considered/background | 0.249384659   | 0.673117551  | 2 |
| 1541 | P23284                           | Peptidyl-prolyl cis-trans isomerase B                                                               | PIPB                       | CTSD/PBS | PIPB      | not considered/background | 0.210638228   | 0.242840713  | 2 |
| 1542 | P23381;P23381-2;G3V3V5;G3V3H8;G  | Tryptophan--tRNA ligase, cytoplasmic;T1-TrpRS;T2-TrpRS                                              | WARS                       | CTSD/PBS | WARS      | not considered/background | -0.055095868  | -0.262673687 | 2 |
| 1543 | P23396;P23396-2;E9PPU1;E9PDP5;F2 | 40S ribosomal protein S3                                                                            | RPS3                       | CTSD/PBS | RPS3      | not considered/background | -0.09511133   | -0.433173124 | 2 |
| 1544 | P23435                           | Cerebellin-1;Cerebellin-1[de-Ser-1];cerebellin                                                      | CBLL1                      | CTSD/PBS | CBLL1     | not considered/background |               |              | 0 |
| 1545 | P23526;P23526-2                  | Adenosylhomocysteinase                                                                              | AHCY                       | CTSD/PBS | AHCY      | not considered/background | -0.003200415  | -0.006477564 | 2 |
| 1546 | P23528;G3V1A4;E9PP50;E9PK25;E9P  | Cofilin-1                                                                                           | CLF1                       | CTSD/PBS | CLF1      | not considered/background | -0.207894294  | -0.260868739 | 2 |
| 1548 | P23634-5;P23634-4;P23634-3;P2363 | Plasma membrane calcium-transporting ATPase 4                                                       | ATP2B4                     | CTSD/PBS | ATP2B4    | not considered/background | -0.255718326  | -0.03562391  | 2 |
| 1549 | P23786;A0A180GVF3;A0A180GVF5;A   | Carnitine O-palmitoyltransferase 2, mitochondrial                                                   | CPT2                       | CTSD/PBS | CPT2      | not considered/background | 0.239398042   | 0.166373134  | 2 |
| 1550 | P24534;C9JZW3;F8WF65;P24534-2    | Elongation factor 1-beta                                                                            | EEF1B2                     | CTSD/PBS | EEF1B2    | not considered/background | 0.398485669   | 0.006619028  | 2 |
| 1551 | P24539;Q5GNZ2                    | ATP synthase F0J complex subunit B1, mitochondrial                                                  | ATP5F1                     | CTSD/PBS | ATP5F1    | not considered/background | 0.286993937   | 0.247217161  | 2 |
| 1552 | P24539;C9JW04                    | Insulin-like growth factor-binding protein 5                                                        | IGFBP5                     | CTSD/PBS | IGFBP5    | not considered/background |               |              | 0 |
| 1553 | P24666;G5E9S5;P24666-2;F2Z2Q9;P  | Low molecular weight phosphotyrosine protein phosphatase                                            | ACP1                       | CTSD/PBS |           |                           |               |              |   |

|      |                                   |                                                                                                            |                 |          |          |                           |              |              |   |
|------|-----------------------------------|------------------------------------------------------------------------------------------------------------|-----------------|----------|----------|---------------------------|--------------|--------------|---|
| 1599 | P30046;J3KQ18;P30046-2;A6NHG4;B   | D-dopachrome decarboxylase;D-dopachrome decarboxylase-like protein                                         | DDT;DDTL        | CTSD/PBS | DDT      | not considered/background |              | -0.188400925 | 1 |
| 1600 | P30048-2;P30048                   | Thioredoxin-dependent peroxide reductase, mitochondrial                                                    | PRDX3           | CTSD/PBS | PRDX3    | not considered/background | 0.254110242  | 0.245796004  | 2 |
| 1601 | P30049                            | ATP synthase subunit delta, mitochondrial                                                                  | ATP5D           | CTSD/PBS | ATP5D    | not considered/background |              | 0.36071226   | 1 |
| 1602 | P30050;P30050-2                   | Enoyl-CoA hydratase, mitochondrial                                                                         | ENH12           | CTSD/PBS | RPL12    | not considered/background | -0.097841502 | 0.09408423   | 2 |
| 1603 | P30084                            | Enoyl-CoA hydratase, mitochondrial                                                                         | ECHS1           | CTSD/PBS | ECHS1    | not considered/background | 0.047677975  | 0.086982323  | 2 |
| 1604 | P30085;P30085-3;Q5TD02;P30085-5   | UMP-CMP kinase                                                                                             | CMPK1           | CTSD/PBS | CMPK1    | not considered/background | -0.171173473 | 0.087610797  | 2 |
| 1605 | P30086                            | Phosphatidylethanolamine-binding protein 1;Hippocampal cholinergic neurostimulating peptid                 | PEBP1           | CTSD/PBS | PEBP1    | not considered/background | -0.060577816 | -0.117030053 | 2 |
| 1606 | P30101                            | Protein disulfide-isomerase A3                                                                             | PDIA3           | CTSD/PBS | PDIA3    | not considered/background | 0.149649582  | 0.136917908  | 2 |
| 1607 | P30153;B3KQV6;C9JC1;EPH38;P30     | Serine/threonine-protein phosphatase 2A G6s kDa regulatory subunit A alpha isoform                         | PPP2R1A         | CTSD/PBS | PPP2R1A  | not considered/background | -0.055141554 | 0.107420059  | 2 |
| 1608 | P30405;EPH9K5;EPH9E;Q8UNP9-2;C2   | Peptidyl-prolyl cis-trans isomerase F, mitochondrial;Peptidyl-prolyl cis-trans isomerase;Peptidyl          | PPHF;PPHE       | CTSD/PBS | PPHF     | not considered/background |              |              | 0 |
| 1609 | P304119;K7E112;P304119-2;Q5       | Glycylglycyl-N-tetradecanoyltransferase 1;Glycylpeptide N-tetradecanoyltransferase;Glycylpep               | NTMT2           | CTSD/PBS | NTMT1    | not considered/background |              | -0.040541794 | 2 |
| 1610 | P30519;P30519-2;A0A087WT44;J3L1   | Heme oxygenase 2                                                                                           | HMOX2           | CTSD/PBS | HMOX2    | not considered/background | 0.079838881  | 0.005072768  | 1 |
| 1611 | P30520                            | Adenylosuccinate synthetase isozyme 2                                                                      | ADSS            | CTSD/PBS | ADSS     | not considered/background | -0.288769428 | -0.405338916 | 2 |
| 1612 | P30533;A0A3831RQ7                 | Alpha-2-macroglobulin receptor-associated protein                                                          | LRAP1           | CTSD/PBS | LRAP1    | not considered/background | 0.207268173  | -0.136060107 | 2 |
| 1613 | P30837;A0A0U1RQK9;P47895;H0YK1    | Aldehyde dehydrogenase X, mitochondrial                                                                    | ALDH1B1         | CTSD/PBS | ALDH1B1  | not considered/background | 0.3887957    | 0.503547877  | 2 |
| 1614 | P31040;P31040-2;D66RMS;P31040-3   | Succinate dehydrogenase [ubiquinone] flavoprotein subunit, mitochondrial                                   | SDHA            | CTSD/PBS | SDHA     | not considered/background | 0.281193775  | 0.154602284  | 2 |
| 1615 | P31146;H3BR93;H3BTU6;H3BRU0;H3E   | Coronin-1A;Coronin                                                                                         | CORO1A          | CTSD/PBS | CORO1A   | not considered/background | 0.085424656  | 0.010904601  | 2 |
| 1616 | P31150;G5E9U5                     | Rag GTPase dissociation inhibitor isoform                                                                  | GDI1            | CTSD/PBS | GDI1     | not considered/background | -0.031056619 | -0.140646474 | 2 |
| 1617 | P31153;P31153-2;Q00266            | S-adenosylmethionine synthase isoform type-2                                                               | MSMT2           | CTSD/PBS | MAT2A    | not considered/background | 0.284514133  | -0.541415716 | 2 |
| 1618 | P31323                            | cAMP-dependent protein kinase type II-beta regulatory subunit                                              | PRKAR2B         | CTSD/PBS | PRKAR2B  | not considered/background | -0.043259943 | -0.245485663 | 2 |
| 1619 | P31689-2;P31689                   | DnaI homolog subfamily A member 1                                                                          | DNAI1A          | CTSD/PBS | DNAI1A   | not considered/background |              | -0.453227826 | 1 |
| 1620 | P31930                            | Cytochrome b-c1 complex subunit 1, mitochondrial                                                           | UQCRC1          | CTSD/PBS | UQCRC1   | not considered/background | 0.195221593  | 0.165612385  | 2 |
| 1621 | P31937;H7BZL2                     | 3-hydroxyisobutyrate dehydrogenase, mitochondrial                                                          | HIBADH          | CTSD/PBS | HIBADH   | not considered/background | 0.160530009  | 0.071436383  | 2 |
| 1622 | P31939-2;P31939;C9JLK0;H7C1S2;F8  | Bifunctional purine biosynthesis protein PURH;Phosphoribosylaminoimidazolecarboxamide for                  | ATIC            | CTSD/PBS | ATIC     | not considered/background | -0.007043089 | -0.088955682 | 2 |
| 1623 | P31942-5;P31942-2;P31942-3;P31942 | Heterogeneous nuclear ribonucleoprotein H3                                                                 | HNRNP3          | CTSD/PBS | HNRNP3   | not considered/background |              | -0.01834931  | 1 |
| 1624 | P31946-2;P31946;Q4V0V1;P31946-1   | Cytochrome beta[alpha]-1,3-3 protein beta[alpha]-1,3-3 protein beta[alpha]-1,3-3 protein beta[alpha]-1,3-3 | YWAB            | CTSD/PBS | YWAB     | not considered/background | -0.017694521 | -0.09448424  | 2 |
| 1625 | P31948;P31948-2;P31948-3;F5H783   | Stress-induced-phosphoprotein                                                                              | STP1            | CTSD/PBS | STP1     | not considered/background | -0.13196125  | -0.241840184 | 1 |
| 1627 | P32004;P32004-3;P32004-2;H0YCS3   | Neural cell adhesion molecule L1                                                                           | L1CAM           | CTSD/PBS | L1CAM    | not considered/background | -0.172050935 | 0.030118284  | 2 |
| 1628 | P32119;A6N1W5;P32119-2            | Peroxiredoxin-2                                                                                            | PRDX2           | CTSD/PBS | PRDX2    | not considered/background | 0.016924144  | 0.053673376  | 2 |
| 1629 | P32189-1;P32189-4;P32189-2;P3218  | Glycerol kinase;Putative glycerol kinase 3                                                                 | GK;GK3P         | CTSD/PBS | GK       | not considered/background | 0.485323774  |              | 1 |
| 1630 | P32322;P32322-3;E2QR83;P32322-2   | Pyroline-5-carboxylate reductase 1, mitochondrial;Pyroline-5-carboxylate reductase                         | PYCR1           | CTSD/PBS | PYCR1    | not considered/background | 0.643394453  | 0.627471303  | 2 |
| 1631 | P32418-5;P32418;P32418-2;P32418   | Sodium/calcium exchanger 1                                                                                 | SLC8A1          | CTSD/PBS | SLC8A1   | not considered/background | -0.300537206 | -0.397145797 | 2 |
| 1632 | P32929;P32929-3;P32929-2          | Cytosolic thionine gamma-lyase                                                                             | CTH             | CTSD/PBS | CTH      | not considered/background |              | 0.030191942  | 1 |
| 1633 | P33176                            | Kinesin-1 heavy chain                                                                                      | KIF5B           | CTSD/PBS | KIF5B    | not considered/background |              |              | 0 |
| 1634 | P33316;P33316-2;H0YWN5;H0YKC5     | Deoxyuridine 5-triphosphate nucleotidohydrolase, mitochondrial                                             | DUT             | CTSD/PBS | DUT      | not considered/background | 0.669661774  | 0.358342999  | 2 |
| 1635 | P34059;H3BP66                     | N-acetylgalactosamine-6-sulfatase                                                                          | GALNS           | CTSD/PBS | GALNS    | not considered/background |              |              | 0 |
| 1636 | P34897;P34897-3;P34897-2;G3V2Y4   | Serine hydroxymethyltransferase, mitochondrial;Serine hydroxymethyltransferase                             | SHMT2           | CTSD/PBS | SHMT2    | not considered/background | 0.501719377  | 0.5316565    | 2 |
| 1637 | P34903                            | Gamma-aminobutyric acid receptor subunit alpha-3                                                           | GABRA3          | CTSD/PBS | GABRA3   | not considered/background |              | 0.15707747   | 1 |
| 1639 | P34932;A0A087WYC1;A0A087WTS8      | Heat shock 70 kDa protein 4                                                                                | HSPA4           | CTSD/PBS | HSPA4    | not considered/background | -0.203933907 | -0.034779158 | 2 |
| 1640 | P35052;H7BZL2;H7C024;K7C410       | Glypican-1;Secreted glypican-1                                                                             | GPC1            | CTSD/PBS | GPC1     | not considered/background |              | -0.05234875  | 2 |
| 1641 | P35221;P35221-2;G3XAM7;E5SR1B1    | CTENIN alpha-1                                                                                             | CTNNA1          | CTSD/PBS | CTNNA1   | not considered/background | -0.628140085 |              | 1 |
| 1642 | P35232;C9JW96;C9JZ20;E7ESE2;E9PC  | Inhibitor                                                                                                  | PHB             | CTSD/PBS | PHB      | not considered/background | 0.262673687  | 0.347068432  | 2 |
| 1643 | P35475;P35475-2;D6R9D5;H0Y9R9     | Alpha-1-iduronidase                                                                                        | IDUA            | CTSD/PBS | IDUA     | not considered/background |              |              | 0 |
| 1646 | P35579-2;P35579                   | Myosin-9                                                                                                   | MYH9            | CTSD/PBS | MYH9     | not considered/background |              |              | 0 |
| 1647 | P35580-4;P35580-3;P35580-2;P3558  | Myosin-10                                                                                                  | MYH10           | CTSD/PBS | MYH10    | not considered/background | -0.207794319 | 0.042568008  | 2 |
| 1648 | P35606;P35606-2;H0YAC7            | Coatomer subunit beta                                                                                      | COPB2           | CTSD/PBS | COPB2    | not considered/background | 0.07943229   | 0.268712471  | 2 |
| 1649 | P35612-2;P35612-1;P35612-8;P35612 | Beta-actinin                                                                                               | ACTB            | CTSD/PBS | ACTB     | not considered/background | -0.27036045  | -0.07956585  | 2 |
| 1650 | P35613-2;P35613;P35613-4;A0A087   | Basigin                                                                                                    | BSG             | CTSD/PBS | BSG      | not considered/background | 0.09868904   | 0.002454669  | 2 |
| 1652 | P35754                            | Glutaredoxin-1                                                                                             | GLRX            | CTSD/PBS | GLRX     | not considered/background |              |              | 0 |
| 1653 | P35813;P35813-3;P35813-2;E9PLT5   | Protein phosphatase 1A                                                                                     | PPM1A           | CTSD/PBS | PPM1A    | not considered/background | 0.07121349   | -0.114766793 | 2 |
| 1654 | P35914                            | Hydroxymethylglutaryl-CoA lyase, mitochondrial                                                             | HMGCL           | CTSD/PBS | HMGCL    | not considered/background |              |              | 0 |
| 1655 | P35998;P35998-2;C9JL59            | 26S protease regulatory subunit 7                                                                          | PSMC2           | CTSD/PBS | PSMC2    | not considered/background | 0.01235413   | 0.10234135   | 2 |
| 1656 | P36021                            | Monocarboxylate transporter 8                                                                              | SLC16A2         | CTSD/PBS | SLC16A2  | not considered/background | -0.129686577 |              | 1 |
| 1657 | P36404;V9GUV0;P36404-2            | ADP-ribosylation factor-like protein 2                                                                     | ARL2            | CTSD/PBS | ARL2     | not considered/background | 0.261951979  |              | 2 |
| 1658 | P36405                            | ADP-ribosylation factor-like protein 3                                                                     | ARL3            | CTSD/PBS | ARL3     | not considered/background | 0.10592569   | -0.260025656 | 2 |
| 1660 | P36507;G5E9C7;A0A180GUL7;MOR1E    | Dual specificity mitogen-activated protein kinase kinase 2                                                 | MAP2K2          | CTSD/PBS | MAP2K2   | not considered/background |              | -0.365132593 | 1 |
| 1661 | P36542-2;P36542-2                 | ATP synthase subunit gamma, mitochondrial                                                                  | ATP5C1          | CTSD/PBS | ATP5C1   | not considered/background | 0.320657964  | 0.319729661  | 2 |
| 1662 | P36543;P36543-2;P36543-3;C9J8H1   | V-type proton ATPase subunit F1                                                                            | ATP6V1E1        | CTSD/PBS | ATP6V1E1 | not considered/background | -0.043140421 | -0.071493743 | 2 |
| 1663 | P36551;H0YAC2;P36551-2;D6ER6      | Oxygen-dependent coroporphyrin-hydrogen-III oxidase, mitochondrial                                         | CPOX            | CTSD/PBS | CPOX     | not considered/background | 0.524565221  | 0.231769086  | 2 |
| 1664 | P36578;H3BM89;H3BT77;H3BU31       | 60S ribosomal protein L4                                                                                   | RPL4            | CTSD/PBS | RPL4     | not considered/background | 0.042931309  | 0.114191388  | 2 |
| 1665 | P36915;A2AB27;A0A1407B72;P36915   | Guanine nucleotide-binding protein-like-1                                                                  | GNL1            | CTSD/PBS | GNL1     | not considered/background | 0.269720899  | -0.042364175 | 2 |
| 1666 | P36917;P36917-2;Q865W4;H0YJ9B     | Hydrolytic proteinase residue transferase component of 2-oxoglutarate dehydrogenase co                     | DLST            | CTSD/PBS | DLST     | not considered/background | 0.28853137   | 0.182032992  | 2 |
| 1667 | P37108;H0YLA2                     | Signal recognition particle 14 kDa protein                                                                 | SRP14           | CTSD/PBS | SRP14    | not considered/background | -0.024854095 |              | 1 |
| 1668 | P37235;E9PC17;P84074;H7BZC1;C9J   | Hippocalcin-like protein 1;Neuron-specific calcium-binding protein hippocalcin                             | HPCAL1          | CTSD/PBS | HPCAL1   | not considered/background | 0.139338514  | 0.004450358  | 2 |
| 1669 | P37268-2;P37268-2;E9PNN1;A0A1W2P  | Squalene synthase                                                                                          | FDFT1           | CTSD/PBS | FDFT1    | not considered/background | 0.205517633  | 0.045982409  | 2 |
| 1670 | P37802-2;P37802;K6RJU6            | Transgelin-2                                                                                               | TAGLN2          | CTSD/PBS | TAGLN2   | not considered/background | 0.070938821  | 0.108129798  | 2 |
| 1671 | P37837;F2Z393;E9PMO1;EP9K18       | Transaldolase                                                                                              | TALDO1          | CTSD/PBS | TALDO1   | not considered/background | 0.149519521  | 0.047055188  | 2 |
| 1672 | P38117-2;P38117;M0Q6V7            | Electron transfer flavoprotein subunit beta                                                                | ETFB            | CTSD/PBS | ETFB     | not considered/background | 0.476537226  | 0.214204346  | 2 |
| 1673 | P38405-2;P38405-2;H0YJ9B;K7CEP2   | guanine nucleotide-binding protein subunit alpha                                                           | GNAL            | CTSD/PBS | GNAL     | not considered/background | -0.04285092  | -0.05234875  | 2 |
| 1674 | P38606-2;P38606;C9JW96;C9JAI17    | V-type proton ATPase catalytic subunit A                                                                   | ATP6V1A         | CTSD/PBS | ATP6V1A  | not considered/background | -0.065989332 | -0.189792938 | 2 |
| 1675 | P38646;A0A3831T4;D6RIJ2;H0YBG6    | Stress-70 protein, mitochondrial                                                                           | HSPA9           | CTSD/PBS | HSPA9    | not considered/background | 0.276537549  |              | 2 |
| 1676 | P39019;MOR2L9;M0QYF7;MOR1A0;A0    | 60S ribosomal protein S19                                                                                  | RPS19           | CTSD/PBS | RPS19    | not considered/background |              | 0.006289413  | 1 |
| 1677 | P39023;G5E9G0;B5MCW2;H7C422;H     | 60S ribosomal protein L3                                                                                   | RPL3            | CTSD/PBS | RPL3     | not considered/background | 0.140386032  | 0.098134879  | 2 |
| 1679 | P40227;P40227-2;J3KR16            | T-complex protein 1 subunit zeta                                                                           | CTCF6           | CTSD/PBS | CTCF6    | not considered/background | -0.11130545  | -0.061292338 | 2 |
| 1681 | P40763;P40763-3;P40763-3;G8LH9    | Signal transducer and activator of transcription 3;Signal transducer and activator of transcription        | STAT3           | CTSD/PBS | STAT3    | not considered/background |              |              | 0 |
| 1682 | P40925;P40925-2;P40925-2;A0A5K1   | Malate dehydrogenase, mitochondrial;Malate dehydrogenase                                                   | MDH1            | CTSD/PBS | MDH1     | not considered/background | -0.224131917 | -0.197236355 | 2 |
| 1683 | P40926;P40926-2;G5XAL0            | Malate dehydrogenase, mitochondrial;Malate dehydrogenase                                                   | MDH2            | CTSD/PBS | MDH2     | not considered/background | 0.386148755  | 0.303365132  | 2 |
| 1684 | Q2VIR3;P41091;Q2VIR3-2;H7BZU1     | Putative eukaryotic translation initiation factor 2 subunit 3-like protein;Eukaryotic translation i        | EIF2S3L;EIF253  | CTSD/PBS | EIF2S3L  | not considered/background |              |              | 0 |
| 1685 | U0KQ65;P41217-2;P41217-1;P41217-3 | OX-2 membrane glycoprotein                                                                                 | CD200           | CTSD/PBS | CD200    | not considered/background | -0.135348305 | -0.071488106 | 2 |
| 1686 | Q6NK51;P41236;E7EUI7;E7EMN6       | Protein phosphatase inhibitor 2-like protein 3;Protein phosphatase inhibitor 2                             | PPP1R2P3;PPP1R2 | CTSD/PBS | PPP1R2P3 | not considered/background |              |              | 0 |
| 1687 | P41240                            | Tyrosine-protein kinase CSK                                                                                | CSK             | CTSD/PBS | CSK      | not considered/background |              |              | 0 |
| 1688 | P41250;A0A6Q8PGZ8;A0A6Q8PGA8;A    | Glycine-tRNA ligase                                                                                        | GARS            | CTSD/PBS | GARS     | not considered/background | 0.083792032  | 0.021452894  | 2 |
| 1689 | P41252;A0A040MSX9;J3KR24          | Isoleucine-tRNA ligase, cytoplasmic                                                                        | ILARS           | CTSD/PBS | ILARS    | not considered/background | 0.242815887  |              | 2 |
| 1691 | P42025                            | Beta-actinin                                                                                               | ACTR1B          | CTSD/PBS | ACTR1B   | not considered/background | -0.22392971  | 0.014703602  | 2 |
| 1692 | P42126-2;P42126-2;P42126-2;P42126 | Enoyl-CoA dehydrogenase 1, mitochondrial                                                                   | ECI1;DCl        | CTSD/PBS | ECI1     | not considered/background | 0.137211271  | 0.207311202  | 2 |
| 1694 | P42262;P42262-3;P42262-2;P42262   | Glutamate receptor 2                                                                                       | GRIA2           | CTSD/PBS | GRIA2    | not considered/background | 0.055195654  | -0.045303168 | 2 |
| 1695 | P42345                            | Serine/threonine-protein kinase mTOR                                                                       | MTOR            | CTSD/PBS | MTOR     | not considered/background |              |              | 0 |
| 1696 | P42574;C9JXK7;A8MVM1              | Caspase-3;Caspase-3 subunit p17;Caspase-3 subunit p12                                                      | CASP3           | CTSD/PBS | CASP3    | not considered/background |              | -0.123268887 | 1 |
| 1697 | P42658-2;E9POL2;E9PFS9;P42658;A0  | Dipeptidyl aminopeptidase-like protein 6                                                                   | DPPE            | CTSD/PBS | DPPE     | not considered/background | -0.075991355 | 0.071466702  | 2 |
| 1698 | P42704;A0A040DG06;B8ZC38;C9JCA5   | Leucine-rich PRR motif-containing protein, mitochondrial                                                   | LRRPRC          | CTSD/PBS | LRRPRC   | not considered/background | 0.113300436  | 0.207511093  | 2 |
| 1699 | P42766;P42768                     | 60S ribosomal protein L35                                                                                  | RPL35           | CTSD/PBS | RPL35    | not considered/background |              |              | 0 |
| 1700 | Q42785;P42785-2;E9PQ85;E9PLB5;E9  | Lysosomal Pro-X carboxypeptidase                                                                           | PRCP            | CTSD/PBS | PRCP     | not considered/background | -0.354298341 | -0.446467986 | 2 |
| 1701 | P42857-2;P42857                   | Neuron-specific protein family member 1                                                                    | NSG1            | CTSD/PBS | NSG1     | not considered/background |              |              | 0 |
| 1702 | P43005;H0Y7R2                     | Excitatory amino acid transporter 3;Amino acid transporter                                                 | SLC1A1          | CTSD/PBS | SLC1A1   | not considered/background |              |              | 0 |
| 1703 | P43007;P43007-2                   | Neutral amino acid transporter A                                                                           | SLC1A4          | CTSD/PBS | SLC1A4   | not considered/background |              | -0.638120188 | 1 |
| 1704 | P43034;A0A6Q8PFU3;A0A6Q8PFT7;A0   | Platelet-activating factor acetylhydrolase IB subunit alpha                                                | PFAFH1B1        | CTSD/PBS | PFAFH1B1 | not considered/background | 0.113833829  | 0.015330452  | 2 |
| 1705 | P43121;P43121-2                   | Gli surface glycoprotein MUC18                                                                             | MCAM            | CTSD/PBS | MCAM     | not considered/background | 0.360532839  | 0.522447003  | 2 |
| 1706 | P43155-2;P43155;P43155-3;H0YAC7   | Carnitine O-acetyltransferase                                                                              | CRAT            | CTSD/PBS | CRAT     | not considered/background | 0.225021599  | 0.228481509  | 2 |
| 1707 | P43304;P34034-2;F5GYK7            | Glycyl-3-phosphate dehydrogenase, mitochondrial                                                            | GP02            | CTSD/PBS | GP02     | not considered/background | 0.113300436  | 0.327653163  | 2 |
| 1708 | P43490;A0A0C4DF58                 | Nicotinamide phosphoribosyltransferase                                                                     | NAMPT           | CTSD/PBS | NAMPT    | not considered/background | -0.158864169 | 0.042308229  | 2 |
| 1709 | P43686-2;P43686                   | 26S protease regulatory sub                                                                                |                 |          |          |                           |              |              |   |

|      |                                                                                                                                                       |                    |          |           |                           |              |              |   |
|------|-------------------------------------------------------------------------------------------------------------------------------------------------------|--------------------|----------|-----------|---------------------------|--------------|--------------|---|
| 1750 | P49720;ADA087WUL2;ADA087WXQ8; Proteasome subunit beta type-3                                                                                          | PSMB3              | CTSD/PSB | PSMB3     | not considered/background | 0,131589484  | 0,174539982  | 2 |
| 1751 | P49721;ADA087WV1 Proteasome subunit beta type-2                                                                                                       | PSMB2              | CTSD/PSB | PSMB2     | not considered/background | -0,240963058 | 0,095588292  | 2 |
| 1752 | P49748;P49748-3;P49748-2;G3V1M7 Very long-chain specific acyl-CoA dehydrogenase, mitochondrial                                                        | ACADVL             | CTSD/PSB | ACADVL    | not considered/background | 0,541911266  | 0,454881868  | 2 |
| 1753 | P49755;G3V1M7 Transmembrane emp 24 domain-containing protein 10                                                                                       | TMED10             | CTSD/PSB | TMED10    | not considered/background | 0,070875598  | 0,122836871  | 2 |
| 1755 | P49768-3;P49768-5;P49768-6;P4976 Presenilin-1; Presenilin-1 NTF subunit; Presenilin-1 CTF subunit; Presenilin-1-CTF12                                 | PSEN1              | CTSD/PSB | PSEN1     | not considered/background |              |              | 0 |
| 1756 | P49773;D6REP8;D6REP9;HOYCA9;D6R Histidine triad nucleotide-binding protein 1                                                                          | HINT1              | CTSD/PSB | HINT1     | not considered/background | -0,193304746 | -0,464891862 | 2 |
| 1757 | P49802-2;P49802-3;P49802-4;P4980 Regulator of G-protein signaling 7                                                                                   | RG57               | CTSD/PSB | RG57      | not considered/background | -0,055156543 | -0,335025838 | 2 |
| 1758 | P49841-2;P49841;ADA083ITW1 Glycogen synthase kinase 3 beta                                                                                            | GSK3B              | CTSD/PSB | GSK3B     | not considered/background | 0,062259864  | -0,31176003  | 2 |
| 1759 | P50148;81AM21;Q03113-3;EP9C54;Guanine nucleotide-binding protein G(i)(q) subunit alpha                                                                | GNAQ               | CTSD/PSB | GNAQ      | not considered/background | 0,143001566  | 0,150705252  | 2 |
| 1760 | P50150 Guanine nucleotide-binding protein G(i)(q)(s)(G) subunit gamma-4                                                                               | GNAG               | CTSD/PSB | GNAG      | not considered/background |              |              | 0 |
| 1761 | P5021-3;HOY172;P50211-3;HOY1M3;Isocitrate dehydrogenase [NAD] subunit alpha, mitochondrial                                                            | IDH3A              | CTSD/PSB | IDH3A     | not considered/background | 0,337996464  | -0,044883678 | 2 |
| 1762 | P50395;P50395-2;Q55X87;V9GYF8;E2 Rab GDP dissociation inhibitor beta                                                                                  | GDI2               | CTSD/PSB | GDI2      | not considered/background | 0,01834931   | -0,084608575 | 2 |
| 1763 | P50402;Q5HY57;F8WUQ1 Eimerin                                                                                                                          | EMD                | CTSD/PSB | EMD       | not considered/background | 0,327112471  | -0,010350188 | 2 |
| 1764 | P50416-2;P50416 Carnitine O-palmitoyltransferase 1, liver isoform                                                                                     | CTP1A              | CTSD/PSB | CTP1A     | not considered/background | -0,733339373 |              | 1 |
| 1765 | P50453;P50452-3;P50452 Serpin B9                                                                                                                      | SERPINB9           | CTSD/PSB | SERPINB9  | not considered/background | -0,049800366 | 0,021848311  | 2 |
| 1766 | P50454;E9P1H8;E9PPV6;E9PR70;E9PK Serpin H1                                                                                                            | SERPINH1           | CTSD/PSB | SERPINH1  | not considered/background | -0,409412351 | -0,55168269  | 2 |
| 1767 | P50502;Q3KNR6;H7C311;Q8I2P2;Q8H HS70-interacting protein; Putative protein FAM104A; Putative protein FAM10AS                                          | ST13;ST13P4;ST13P5 | CTSD/PSB | ST13      | not considered/background | 0,064331046  | -0,022048165 | 2 |
| 1768 | P50570-5;P50570-4;P50570-3;P50570-2 Dynamin-2                                                                                                         | NUDT2              | CTSD/PSB | NUDT2     | not considered/background | -0,127714939 |              | 2 |
| 1769 | P50583 Bif-5 (nucleolar) tetraphosphatase [asymmetrical]                                                                                              | RPL14              | CTSD/PSB | RPL14     | not considered/background | 0,23878686   | 0,004609553  | 2 |
| 1770 | P50914;E7EPB3 60S ribosomal protein L14                                                                                                               | RPL14              | CTSD/PSB | RPL14     | not considered/background | -0,194096747 | -0,07560941  | 2 |
| 1771 | P50990-2;P50990;P50990-3;H7CAC8; T-complex protein 1 subunit theta                                                                                    | CTC8               | CTSD/PSB | CTC8      | not considered/background | -0,010890065 | -0,037733627 | 2 |
| 1772 | P50991;P50991-2 T-complex protein 1 subunit delta                                                                                                     | CTC4               | CTSD/PSB | CTC4      | not considered/background | -0,03834704  | -0,005040617 | 2 |
| 1773 | P50995;P50995-2;H0Y6E1 Annexin A11                                                                                                                    | ANXA11             | CTSD/PSB | ANXA11    | not considered/background | -0,582836093 | 0,242737747  | 2 |
| 1774 | P51148;P51148-2;K7ENY4;K7ER18;K7R Ras-related protein Rab-5C                                                                                          | RAB5C              | CTSD/PSB | RAB5C     | not considered/background | 0,088955682  | 0,035370276  | 2 |
| 1775 | P51149;ADA068PBG6;CJ9S83;ADA06 Ras-related protein Rab-7a                                                                                             | RAB7A              | CTSD/PSB | RAB7A     | Transport machinery       | 0,111432005  | 0,072118713  | 2 |
| 1776 | P51151;ADA180GU10 Ras-related protein Rab-9a                                                                                                          | RAB9A              | CTSD/PSB | RAB9A     | not considered/background |              |              | 0 |
| 1777 | P51178;P51178-2 1-phosphatidylinositol 4,5-bisphosphate phosphodiesterase delta-1                                                                     | PLCD1              | CTSD/PSB | PLCD1     | not considered/background | -0,355405339 | 0,109825723  | 2 |
| 1778 | P51398-2;P51398-3;P51398;V9GYL9; 28S ribosomal protein S29, mitochondrial                                                                             | DAP3               | CTSD/PSB | DAP3      | not considered/background | 0,169796756  | 0,35038488   | 2 |
| 1779 | P51513-5;P51513;3JKUQ3;GBLUA5;I3I RNA-binding protein Nova-1                                                                                          | NOVA1              | CTSD/PSB | NOVA1     | not considered/background |              | 0,054497169  | 1 |
| 1781 | P51553;G5EQ7;P51553-2;E7EQB8;E1 Isocitrate dehydrogenase [NAD] subunit gamma, mitochondrial; isocitrate dehydrogenase [NAD] gamma subunit delta       | IDH3G              | CTSD/PSB | IDH3G     | not considered/background | 0,459116814  | 0,212032684  | 2 |
| 1782 | P51571;AN6LM8 Translocase-associated protein subunit delta                                                                                            | SRP41              | CTSD/PSB | SRP41     | not considered/background | -0,021110502 | -0,12735555  | 2 |
| 1783 | P51572;P51572-2;ADA028Y5M6;CJ9S 8-cell receptor-associated protein 31                                                                                 | BCAP31             | CTSD/PSB | BCAP31    | not considered/background | 0,144690925  | 0,055786227  | 2 |
| 1784 | P51649;P51649-2;CJ9IK05;ADA05F92 Succinate semialdehyde dehydrogenase, mitochondrial                                                                  | ALDH5A1            | CTSD/PSB | ALDH5A1   | not considered/background | 0,26381461   | 0,063047411  | 2 |
| 1785 | P51659;ADA028YD50;P51659-3;P516 Peroxisomal multifunctional enzyme type 2; (3R) hydroxyacyl-CoA dehydrogenase; Enoyl-CoA hyd                          | HSD17B4            | CTSD/PSB | HSD17B4   | not considered/background | -0,1032864   | -0,184470737 | 2 |
| 1786 | P51665;H3BN17;H3BTHM;H3BQV2 26S proteasome non-ATPase regulatory subunit 7                                                                            | PSMD7              | CTSD/PSB | PSMD7     | not considered/background | 0,078336571  | -0,071350804 | 2 |
| 1787 | P51674;P51674-3;P51674-2;D6R9D2 Neuronal membrane glycoprotein M6-a                                                                                   | GP6MA              | CTSD/PSB | GP6MA     | not considered/background | 0,262192588  | -0,163025606 | 2 |
| 1788 | P51687 Sulfite oxidase, mitochondrial                                                                                                                 | SUOX               | CTSD/PSB | SUOX      | not considered/background | 0,208766947  | 0,093879047  | 2 |
| 1789 | P51688;I3NI22 N-sulphoglucosamine sulphohydrolase                                                                                                     | SGSH               | CTSD/PSB | SGSH      | not considered/background | -0,096900012 | -0,347212086 | 2 |
| 1790 | P51797-5;P51797;P51797-3;P51797-2 Chloride transporter protein 6                                                                                      | CLCN6              | CTSD/PSB | CLCN6     | not considered/background | 0,052276765  | 0,02148218   | 2 |
| 1791 | P51798-2;P51798;HOY2M6 H1V(C)1 exchanger transporter 7                                                                                                | CLCN7              | CTSD/PSB | CLCN7     | not considered/background |              |              | 0 |
| 1792 | P51805 Plectin A3                                                                                                                                     | PLXNA3             | CTSD/PSB | PLXNA3    | not considered/background | -0,278076181 | -0,063047411 | 2 |
| 1793 | P51809-3;P51809;P51809-2 Vesicle-associated membrane protein 7                                                                                        | VAMP7              | CTSD/PSB | VAMP7     | not considered/background | 0,295252823  | -0,022474347 | 2 |
| 1794 | P51970 NADH dehydrogenase [ubiquinone] 1 alpha subcomplex subunit 8                                                                                   | NDUFAB8            | CTSD/PSB | NDUFAB8   | not considered/background | 0,339593501  | 0,076113018  | 2 |
| 1795 | P51991;P51991-2;H7C1H8 Heterogeneous nuclear ribonucleoprotein A3                                                                                     | HNRNPA3            | CTSD/PSB | HNRNPA3   | not considered/background |              |              | 0 |
| 1796 | P52209-2;P52209;K7EM49;K7EM22;K 6-phosphogluconate dehydrogenase, decarboxylating                                                                     | PGD                | CTSD/PSB | PGD       | not considered/background | -0,120905941 | -0,159758338 | 2 |
| 1797 | P52306;P52306-5;P52306-4;P52306-3 Rap1 GTPase-GDP dissociation stimulator 1                                                                           | RAP1GDS1           | CTSD/PSB | RAP1GDS1  | not considered/background | -0,312258449 | -0,437653878 | 2 |
| 1798 | P52565;J3KTF8;J3QDCU;J3KRE2;P525 Rho GTPase-dissociation inhibitor 1                                                                                  | ARHGDI4            | CTSD/PSB | ARHGDI4   | not considered/background | -0,153590931 | -0,226098197 | 2 |
| 1799 | P52594-2;P52594-3;P52594;P52594 Arf GAP domain and FG repeat-containing protein 1                                                                     | AFG1               | CTSD/PSB | AFG1      | not considered/background | -0,186376809 | -0,135666197 | 2 |
| 1801 | P52788;P52788-2;H7C2R7 Spermine synthase                                                                                                              | SMS                | CTSD/PSB | SMS       | not considered/background |              | 0,014718176  | 1 |
| 1803 | P52823;P52823-2 Stannocalcin-1                                                                                                                        | STC1               | CTSD/PSB | STC1      | not considered/background |              | 0,196227406  | 1 |
| 1804 | Q04828;P52895;HOY804;B4DK69;S4R Aldo-keto reductase family 1 member C1; Aldo-keto reductase family 1 member C2                                        | AKR1C1;AKR1C2      | CTSD/PSB | AKR1C1    | not considered/background | -0,327565606 | -0,374955996 | 2 |
| 1805 | P52907 F-actin-capping protein subunit alpha-1                                                                                                        | CAPZA1             | CTSD/PSB | CAPZA1    | not considered/background | 0,166715445  | -0,061154063 | 2 |
| 1806 | P52943;HOYFA4;P52943-2;HOYH08 Cysteine-rich protein 2                                                                                                 | CRIP2              | CTSD/PSB | CRIP2     | not considered/background | -0,380840569 | -0,362778454 | 2 |
| 1807 | P53004;CJ3IE1 Biliverdin reductase A                                                                                                                  | BVR1A              | CTSD/PSB | BVR1A     | not considered/background |              | -0,343097039 | 1 |
| 1808 | P53007;B4D962 Tricarboxylate transport protein, mitochondrial                                                                                         | SLC25A1            | CTSD/PSB | SLC25A1   | not considered/background | 0,23793077   | 0,204881413  | 2 |
| 1809 | P53396-2;P53396;P53396-3;K7ESG8; ATP-citrate synthase                                                                                                 | ACLY               | CTSD/PSB | ACLY      | not considered/background | -0,0957587   | -0,005615567 | 2 |
| 1810 | P53597;ADA049C001;H7C233 Succinyl-CoA ligase [ADP/GDP-forming] subunit alpha, mitochondrial                                                           | SUCLG1             | CTSD/PSB | SUCLG1    | not considered/background | 0,351176003  | -0,071858389 | 2 |
| 1811 | P53602;H3BP35;H3BQ47;H3BRZ1;H3I Diphosphomethylate decarboxylase                                                                                      | MVD                | CTSD/PSB | MVD       | not considered/background |              | 0,028101506  | 1 |
| 1812 | P53618;E9PP73;E9PP63;E9PKJ1 Coatomer subunit beta                                                                                                     | COPB1              | CTSD/PSB | COPB1     | not considered/background |              |              | 0 |
| 1813 | P53701 Cytochrome c-type hemelyase                                                                                                                    | HCCS               | CTSD/PSB | HCCS      | not considered/background |              |              | 0 |
| 1814 | P53985;Q5TBR3;P53985-2;Q5TBR5 Monocarboxylate transporter 1                                                                                           | SLC16A1            | CTSD/PSB | SLC16A1   | not considered/background |              |              | 0 |
| 1815 | P53990-2;P53990;P53990-4;H3BQ71 H1V(C)1 homolog                                                                                                       | IST1               | CTSD/PSB | IST1      | not considered/background |              | 0,126832518  | 2 |
| 1817 | P54136;P54136-2;E5RH09;E5RIJM9 Arginine-tRNA ligase, cytoplasmic                                                                                      | RARS               | CTSD/PSB | RARS      | not considered/background | 0,138683408  | 0,110448581  | 2 |
| 1818 | P54284-5;P54284-3;P54284-4;P5428 Voltage-dependent L-type calcium channel subunit beta-3                                                              | CACNB3             | CTSD/PSB | CACNB3    | not considered/background | -0,040853046 |              | 1 |
| 1819 | P54289-2;P54289-3;P54289-5;P5428 Voltage-dependent calcium channel subunit alpha-2/delta-1; Voltage-dependent calcium channel subunit alpha-2/delta-1 | CACNA2D1           | CTSD/PSB | CACNA2D1  | not considered/background | 0,046147182  | 0,156562796  | 2 |
| 1820 | P54577;ADA068PBG2;ADA068PBG5;AI Tyrosine-tRNA ligase, cytoplasmic; Tyrosine-tRNA ligase, cytoplasmic; N-terminally processed; TYRARS                  | YARS               | CTSD/PSB | YARS      | not considered/background | 0,186120184  | 0,221118603  | 2 |
| 1821 | P54687-4;P54687-5;P5H2F2; Branched-chain-amino-acid aminotransferase, cytosolic                                                                       | BCAT1              | CTSD/PSB | BCAT1     | not considered/background | -0,303704331 | -0,063226802 | 2 |
| 1822 | P54709;CJ9IA6;P54709-2;CJ9IK2;H1V Sodium/potassium-transporting ATPase subunit beta-3                                                                 | ATP1B3             | CTSD/PSB | ATP1B3    | not considered/background | -0,023955203 | 0,029328029  | 2 |
| 1824 | P54727;P54727-2;Q5W055;HOY1979; H1V cytosolic epair protein; H1V cytosolic epair protein; H1V cytosolic epair protein                                 | RAD23B             | CTSD/PSB | RAD23B    | not considered/background | 0,131589484  | -0,05678078  | 2 |
| 1825 | P54802 Alpha-N-acetylglucosaminidase; Alpha-N-acetylglucosaminidase 82 kDa form; Alpha-N-acetylgluc                                                   | NAGLU              | CTSD/PSB | NAGLU     | not considered/background | -0,453616569 |              | 2 |
| 1826 | P54803;P54803-4;P54803-3;P54803 Galactocerebrosidase                                                                                                  | GALC               | CTSD/PSB | GALC      | Lysosomal enzymes         | -0,006245944 | -0,410558198 | 2 |
| 1827 | P54829-2;P54829-3;P54829;E9PLZ4;J Tyrosine-protein phosphatase non-receptor type 5; Protein-tyrosine-phosphatase                                      | PTPN5              | CTSD/PSB | PTPN5     | not considered/background | 0,097475959  |              | 1 |
| 1828 | P54886-2;P54886 Delta-1-pyrroline-5-carboxylate synthase; Glutamate 5-kinase; Gamma-glutamyl phosphate reductase                                      | ALDH18A1           | CTSD/PSB | ALDH18A1  | not considered/background | 0,799004309  | 0,038939875  | 2 |
| 1829 | P55010;MOR0V2;MOR2M1;MOR058;N Alpha-soluble NSF attachment protein                                                                                    | NAPA               | CTSD/PSB | NAPA      | not considered/background | 0,077926579  | 0,038613745  | 2 |
| 1830 | P55020;HOYK12;HOYNA40;HOYK11;HOY Eukaryotic translation initiation factor 5                                                                           | EIF5               | CTSD/PSB | EIF5      | not considered/background | 0,142609487  | 0,046917908  | 2 |
| 1831 | P55011;P55011-1;G3V1A9 Solute carrier family 12 member 2                                                                                              | SLC12A2            | CTSD/PSB | SLC12A2   | not considered/background | 0,015497569  | -0,054993725 | 2 |
| 1832 | P55036;Q5VWC4;HOY3V9;HOY5E1;A6I 26S proteasome non-ATPase regulatory subunit 4                                                                        | PSMD4              | CTSD/PSB | PSMD4     | not considered/background |              | 0,012068023  | 2 |
| 1833 | P55060-3;P55060;P55060-4;P55060 Exportin-2                                                                                                            | CSE1L              | CTSD/PSB | CSE1L     | not considered/background | -0,21175121  | -0,087327052 | 2 |
| 1834 | P55072;CJ9ZAS;CJ9UP7 Transitional endoplasmic reticulum ATPase                                                                                        | VCP                | CTSD/PSB | VCP       | not considered/background | -0,021672556 | 0,037473187  | 2 |
| 1835 | P55084-2;P55084;F5GQ23;B5MD38;C Trifunctional enzyme subunit beta, mitochondrial; 3-ketoacyl-CoA thiolase                                             | HADHB              | CTSD/PSB | HADHB     | not considered/background | -0,038317409 | -0,085977719 | 2 |
| 1836 | P55145;H7C2D6 Mesencephalic astrocyte-derived neurotrophic factor                                                                                     | MANF               | CTSD/PSB | MANF      | not considered/background | 0,484808397  | 0,404267207  | 2 |
| 1837 | P55290;P55290-4;P55290-3;P55290-2 Cadherin-13                                                                                                         | CDH13              | CTSD/PSB | CDH13     | not considered/background | -0,185605441 | -0,0528332   | 2 |
| 1838 | P55317-2;P55317;P55327 Tumor protein p53                                                                                                              | TP53               | CTSD/PSB | TP53      | not considered/background | -0,227742706 | -0,059493725 | 2 |
| 1839 | P55735;P55735-2;P55735-4;P55735-3 Succinyl-CoA:3-oxoacid coenzyme A transferase 1, mitochondrial                                                      | SECI13             | CTSD/PSB | SECI13    | not considered/background |              |              | 0 |
| 1840 | P55809;E9PPW2;P55809-2;Q8BYC2 Succinyl-CoA:3-oxoacid coenzyme A transferase 1, mitochondrial                                                          | OXCT1              | CTSD/PSB | OXCT1     | not considered/background | 0,19181529   | 0,123858326  | 2 |
| 1841 | P55884-2;P55884;CJ9J21 Eukaryotic translation initiation factor 3 subunit B                                                                           | EIF3B              | CTSD/PSB | EIF3B     | not considered/background |              |              | 0 |
| 1842 | P56134-3;P56134 ATP synthase subunit f, mitochondrial                                                                                                 | ATPS12             | CTSD/PSB | ATPS12    | not considered/background |              |              | 0 |
| 1843 | P56181-2 NADH dehydrogenase [ubiquinone] flavoprotein 3, mitochondrial                                                                                | NDUFV3             | CTSD/PSB | NDUFV3    | not considered/background |              |              | 0 |
| 1844 | P56192;P56192-2;F5H2V6;HOYIP0;H1V Methionine-tRNA ligase, cytoplasmic                                                                                 | MARS               | CTSD/PSB | MARS      | not considered/background | 0,056444801  |              | 2 |
| 1845 | G5VU0H;P56381 ATP synthase subunit epsilon-like protein, mitochondrial; ATP synthase subunit epsilon, mitocho                                         | ATP5F2;ATP5E       | CTSD/PSB | ATP5F2    | not considered/background | 0,227494651  | 0,375272085  | 2 |
| 1846 | P56385 ATP synthase subunit epsilon, mitochondrial                                                                                                    | ATP5I              | CTSD/PSB | ATP5I     | not considered/background | 0,498863564  | 0,201410261  | 2 |
| 1847 | P56537-2;P56537;F8WU20;B7ZBH1;A Eukaryotic translation initiation factor 6                                                                            | EIF6               | CTSD/PSB | EIF6      | not considered/background |              | -0,49610438  | 1 |
| 1849 | P56817-2;P56817;P56817-4;P56817-1 Beta-secretase 1                                                                                                    | BACE1              | CTSD/PSB | BACE1     | not considered/background |              | -0,147697444 | 1 |
| 1850 | P59768;G3VJ39;G3V2N0;G3VC29;G3G Guanine nucleotide-binding protein G(i)(q)(s)(G) subunit gamma-2; Guanine nucleotide-bindin                           | GNG2               | CTSD/PSB | GNG2      | not considered/background | 0,265316867  | -0,082392573 | 2 |
| 1852 | P60174;P60174-3;P60174-4;U3KP20; Triosephosphate isomerase                                                                                            | TP11               | CTSD/PSB | TP11      | not considered/background | -0,007927771 | -0,054223347 | 2 |
| 1853 | P60228;E5R1T4;HOYB85;E5RHS5;E5R6 Eukaryotic translation initiation factor 3 subunit E                                                                 | EIF3E              | CTSD/PSB | EIF3E     | not considered/background |              | -0,105330029 | 2 |
| 1854 | P60468;S4R385 Protein transport protein SecE1 subunit beta                                                                                            | SEC61B             | CTSD/PSB | SEC61B    | not considered/background | 0,435415241  |              | 2 |
| 1855 | P60520;H3BMS5;H3BQ00 Gamma-aminobutyric acid receptor-associated protein-like 2                                                                       | GABARAPL2          | CTSD/PSB | GABARAPL2 | not considered/background | 0,297018088  | 0,144679966  | 2 |
| 1857 | P60763;J3KSC4;J3KX10 Ras-related C3 botulinum toxin substrate 3                                                                                       | RAC3               | CTSD/PSB | RAC3      | not considered/background | -0,035651399 | 0,035756644  | 2 |
| 1858 | P60842;P60842-2;J3K1T12;J3Q6E9;J3K Eukaryotic initiation factor 4A1                                                                                   | EIF4A1             | CTSD/PSB | EIF4A1    | not considered/background | 0,171847314  | 0,078914102  | 2 |
| 1859 | P60880;ADA0A0M50 Synaptosomal-associated protein 25                                                                                                   | SNAP25             | CTSD/PSB | SNAP25    | not considered/background | 0,136060107  | -0,1298764   |   |

|      |                                        |                                                                                                     |                             |          |          |                           |              |              |   |
|------|----------------------------------------|-----------------------------------------------------------------------------------------------------|-----------------------------|----------|----------|---------------------------|--------------|--------------|---|
| 1904 | P62195;P62195-2;J3QQM1;J3QLH6;J265     | protease regulatory subunit 8                                                                       | PSMC5                       | CTSD/PBS | PSMC5    | not considered/background | 0.069839625  | 0.149968725  | 2 |
| 1905 | P62241;Q5JIR5                          | 40S ribosomal protein S18                                                                           | RP58                        | CTSD/PBS | RP58     | not considered/background | -0.066095051 | -0.077789898 | 1 |
| 1906 | P62258;P62258-2;B4DFJ2;J3L3T1;K714-3-3 | protein epsilon                                                                                     | YWHAH                       | CTSD/PBS | YWHAH    | not considered/background | 0.05935278   | 0.038835536  | 2 |
| 1907 | P62269;A0A06W2J1QH2;Q5GGW2;J3J56       | 40S ribosomal protein S18                                                                           | RP518                       | CTSD/PBS | RP518    | not considered/background | 0.021321243  | 0.001321243  | 1 |
| 1911 | P62330                                 | ADP-ribosylation factor 6                                                                           | ARF6                        | CTSD/PBS | ARF6     | not considered/background | -0.392727087 | -0.047817548 | 2 |
| 1912 | P62424;Q5T8U3;Q5T8U2                   | 60S ribosomal protein L7a                                                                           | RPL7A                       | CTSD/PBS | RPL7A    | not considered/background | 0.05056793   | 0.446875459  | 2 |
| 1913 | P62701;Q8TD47;C9JEH7;P22090            | 40S ribosomal protein S4, X isoform                                                                 | RP54X                       | CTSD/PBS | RP54X    | not considered/background | -0.082163468 | 0.014470425  | 2 |
| 1916 | P62745                                 | Rho-related GTP-binding protein Rhob                                                                | RHOB                        | CTSD/PBS | RHOB     | not considered/background | -0.002295711 | 0.078959817  | 2 |
| 1917 | P62753;A2A3R5;A2A3R7                   | 40S ribosomal protein S6                                                                            | RP56                        | CTSD/PBS | RP56     | not considered/background | -0.045684556 | -0.001874286 | 1 |
| 1918 | P62760;E7EAT7;E9PE24                   | Vismin-like protein 1                                                                               | VSNL1                       | CTSD/PBS | VSNL1    | not considered/background | 0.316276601  | -0.466757616 | 2 |
| 1919 | P62805                                 | Histone H4                                                                                          | HIST1H4A                    | CTSD/PBS | HIST1H4A | not considered/background | -0.071640986 | -0.031289164 | 2 |
| 1920 | P62820;E7END7;P62820-2;P62820-3        | Ras-related protein Rab-1A                                                                          | RAB1A                       | CTSD/PBS | RAB1A    | not considered/background | 0.093424959  | 0.0042412226 | 2 |
| 1921 | P62829;J3KT13;C9JD32;J3KT29;J3QJQ      | 60S ribosomal protein L23                                                                           | RPL23                       | CTSD/PBS | RPL23    | not considered/background | 0.300235177  | 0.300235177  | 1 |
| 1922 | P62834;A0A07586Q0                      | Ras-related protein Rap-1A                                                                          | RAP1A                       | CTSD/PBS | RAP1A    | not considered/background | 0.012783185  | -0.211510563 | 2 |
| 1923 | P62851                                 | 40S ribosomal protein S25                                                                           | RP525                       | CTSD/PBS | RP525    | not considered/background | 0.012783185  | -0.211510563 | 2 |
| 1925 | P62873;P62873-2;P6UT28;B1AKQ8;B:       | Guanine nucleotide-binding protein G(I)/G(S)/G(T) subunit beta-1                                    | GNB1                        | CTSD/PBS | GNB1     | not considered/background | -0.114909869 | -0.089362017 | 2 |
| 1926 | P62877                                 | E3 ubiquitin-protein ligase RBX1;E3 ubiquitin-protein ligase RBX1, N-terminally processed           | RBX1                        | CTSD/PBS | RBX1     | not considered/background | -0.061270081 | -0.047538389 | 2 |
| 1927 | P62879;C9JAK5;E7EP32;C9JIS1;C9JZN      | Guanine nucleotide-binding protein G(I)/G(S)/G(T) subunit beta-2                                    | GNB2                        | CTSD/PBS | GNB2     | not considered/background | -0.061270081 | -0.047538389 | 2 |
| 1928 | P62906                                 | 60S ribosomal protein L10a                                                                          | RPL10A                      | CTSD/PBS | RPL10A   | not considered/background | 0.3400391357 | -0.059591913 | 2 |
| 1929 | P62913;Q5VVC8;P62913-2                 | 60S ribosomal protein L11                                                                           | RPL11                       | CTSD/PBS | RPL11    | not considered/background | -0.087733372 | -0.234623941 | 2 |
| 1930 | P62937;F8W6E5;C9J557;P62937-2;Q:       | Peptidyl-prolyl cis-trans isomerase A;Peptidyl-prolyl cis-trans isomerase A, N-terminally processed | PP1A                        | CTSD/PBS | PP1A     | not considered/background | 0.06406971   | -0.155691721 | 2 |
| 1931 | P62942;Q1JUQ3;Q1JUQ5;A0A087WTS         | Peptidyl-prolyl cis-trans isomerase FKBP1A;Peptidyl-prolyl cis-trans isomerase                      | FKBP1A                      | CTSD/PBS | FKBP1A   | not considered/background | -0.05066611  | 0.105892363  | 2 |
| 1932 | P62979;P6C648;B4DV12;Q96C32;Q5:        | Ubiquitin-40S ribosomal protein S27a;Polyubiquitin-C;JL RPS27A;UBC;UBB;UBA52                        | RP527A                      | CTSD/PBS | RP527A   | not considered/background | -0.05066611  | 0.105892363  | 2 |
| 1933 | P62993;P62993-2;J3KT8J;J3QRL5          | Growth factor receptor-bound protein 2                                                              | GRB2                        | CTSD/PBS | GRB2     | not considered/background | 0.140647793  | 0.013525656  | 2 |
| 1934 | P63000;P63000-2;P15135;B1AH77;B:       | Ras-related C3 botulinum toxin substrate 1;Ras-related C3 botulinum toxin substrate 2               | RAC1-RAC2                   | CTSD/PBS | RAC1     | not considered/background | 0.090319233  | -0.11209958  | 2 |
| 1935 | P63010;P63010-2;P63010-3;A0A087A       | CTD complex-associated protein 1                                                                    | CTBP1                       | CTSD/PBS | CTBP1    | not considered/background | -0.013713247 | -0.031289164 | 2 |
| 1936 | Q5JW72;P63092-4;P63092;A0A040M         | Guanine nucleotide-binding protein G(i) subunit alpha isoforms XLa;Guanine nucleotide-binding       | GNAS                        | CTSD/PBS | GNAS     | not considered/background | 0.2880632    | 0.141684736  | 2 |
| 1937 | P63096;P63096-2;A0A038JTM0;A0A3        | Guanine nucleotide-binding protein G(i) subunit alpha-1                                             | GNAI1                       | CTSD/PBS | GNAI1    | not considered/background | -0.062776151 | 0.039814527  | 2 |
| 1938 | P63104;E7EXK9;B0AZS6;P63104-2;B7       | 14-3-3 protein zeta/delta                                                                           | YWHAZ                       | CTSD/PBS | YWHAZ    | not considered/background | -0.037354739 | -0.024177814 | 2 |
| 1939 | P63151;P63151-2;ESR1Y1;A0A590J01       | Serine/threonine-protein phosphatase 2A 55 kDa regulatory subunit B alpha isoform                   | PPP2R2A                     | CTSD/PBS | PPP2R2A  | not considered/background | 0.034215715  | -0.06060083  | 2 |
| 1940 | P63167;F8VXL2;F8VRV5;F8VX07            | Dynein light chain 1, cytoplasmic                                                                   | DYNLL1                      | CTSD/PBS | DYNLL1   | not considered/background | 0.204410717  | -0.430392334 | 2 |
| 1941 | P63172                                 | Dynein light chain Tctex-type 1                                                                     | DYNLT1                      | CTSD/PBS | DYNLT1   | not considered/background | 0.262553427  | 0.262553427  | 1 |
| 1942 | P63244;D6REES;D6RH14;D6R9L0;H0:        | Guanine nucleotide-binding protein subunit beta-2-like 1;Guanine nucleotide-binding protein         | GNB2L1                      | CTSD/PBS | GNB2L1   | not considered/background | -0.179351281 | -0.163885117 | 2 |
| 1944 | P63313;CON_P21752                      | Thymosin beta-1                                                                                     | TMSB10                      | CTSD/PBS | TMSB10   | not considered/background | 0.314754522  | -0.070938821 | 2 |
| 1946 | P67870;Q5SRQ6;Q5SRQ3;Q0EA72;A0:        | Cas9 kinase II subunit beta                                                                         | CSNK2B;CSNK2B-LV65B8-1181;C | CTSD/PBS | CSNK2B   | not considered/background | -0.327855304 | -0.416083074 | 2 |
| 1947 | P67936;A0A2R8Y5V9;A0A2R8YXG3;P:        | Protoporphyrin alpha-4 chain                                                                        | TPM4                        | CTSD/PBS | TPM4     | not considered/background | 0.337654011  | -0.328606717 | 2 |
| 1949 | P68036;P68036-3;P68036-2;A0A1B01       | Ubiquitin-conjugating enzyme E2 L3                                                                  | UBE2L3                      | CTSD/PBS | UBE2L3   | not considered/background | 0.041383179  | -0.100574004 | 2 |
| 1950 | P68104;Q5VTE;A0A087WV01;A0A08          | Elongation factor 1-alpha 1;Putative elongation factor 1-alpha-like 3;Elongation factor 1-alpha     | EEF1A1;EEF1A1P5             | CTSD/PBS | EEF1A1   | not considered/background | -0.211949131 | -0.041663532 | 2 |
| 1951 | P68366;P68366-2;P68366-3;C9JQO0;C9:    | Tubulin alpha-4A chain                                                                              | TUBA4A                      | CTSD/PBS | TUBA4A   | not considered/background | -0.036217492 | -0.267475872 | 2 |
| 1953 | P68371                                 | Tubulin beta-4B chain                                                                               | TUBB4B                      | CTSD/PBS | TUBB4B   | not considered/background | -0.316797627 | -0.306028869 | 2 |
| 1954 | P68402;P68402-3;P68402-2;J3KNE3;       | Platelet-activating factor acetylhydrolase I8 subunit beta                                          | PAFAH1B2                    | CTSD/PBS | PAFAH1B2 | not considered/background | 0.162725653  | -0.151988666 | 2 |
| 1955 | P78310;P78310-2;P78310-2;P78310-2      | Coxsackievirus and adenovirus receptor                                                              | CXADR                       | CTSD/PBS | CXADR    | not considered/background | 0.142704172  | -0.063502942 | 2 |
| 1956 | P78318                                 | Immunoglobulin-binding protein 1                                                                    | IGBP1                       | CTSD/PBS | IGBP1    | not considered/background | 0.167871708  | 0.097841502  | 2 |
| 1957 | P78324;P78324-2;P78324-4;Q5TFQ8;       | Tyrosine-protein phosphatase non-receptor type substrate 1                                          | SIRPA                       | CTSD/PBS | SIRPA    | not considered/background | -0.091525234 | -0.184851546 | 2 |
| 1959 | P78344-2;P78344;H0Y3P2;Q2DQV9;H:       | Eukaryotic translation initiation factor 4 gamma 2                                                  | EIF4G2                      | CTSD/PBS | EIF4G2   | not considered/background | 0.135847602  | -0.267475872 | 2 |
| 1960 | P78356;P78356-2;P78356-3;P78356-4;     | Phosphatidylinositol 3-kinase type 2 beta                                                           | PIK4R2B                     | CTSD/PBS | PIK4R2B  | not considered/background | -0.05566266  | -0.05566266  | 2 |
| 1961 | P78357;P78357                          | Contactin-associated protein 1                                                                      | CNTNAP1                     | CTSD/PBS | CNTNAP1  | not considered/background | 0.089362553  | 0.119714136  | 2 |
| 1963 | P78371;P78371-2;P78371-2;P78371-2      | T-complex protein 1 subunit beta                                                                    | CTC2                        | CTSD/PBS | CTC2     | not considered/background | -0.1386798   | 0.016453631  | 2 |
| 1964 | P78417;Q5TA02;P78417-2;P78417-3;       | Glutathione S-transferase omega-1                                                                   | GSTO1                       | CTSD/PBS | GSTO1    | not considered/background | 0.609187605  | 0.333716053  | 2 |
| 1965 | P78540                                 | Arginase-2, mitochondrial                                                                           | ARG2                        | CTSD/PBS | ARG2     | not considered/background | 0.609187605  | 0.333716053  | 2 |
| 1966 | P80303-2;P80303;E9PKK6;Q2L696;B:       | Nucleobindin-2;Nesfat-1                                                                             | NUCB2;Nucb2                 | CTSD/PBS | NUCB2    | not considered/background | 0.593401581  | 0.429478779  | 2 |
| 1967 | P80370                                 | Protein delta homolog 1;Fetal antigen 1                                                             | DLK1                        | CTSD/PBS | DLK1     | not considered/background | -0.427149137 | -0.361547761 | 2 |
| 1968 | P80723;P80723-2;J3UKQ0                 | Brain acid soluble protein 1                                                                        | BASP1                       | CTSD/PBS | BASP1    | not considered/background | 0.445620775  | -0.361547761 | 2 |
| 1970 | P82609;E7EPW2;P82663-3;P82663-2;       | 28S ribosomal protein S25, mitochondrial                                                            | MRPS25                      | CTSD/PBS | MRPS25   | not considered/background | 0.352758525  | 0.330592196  | 2 |
| 1971 | P82664                                 | 28S ribosomal protein S10, mitochondrial                                                            | MRPS10                      | CTSD/PBS | MRPS10   | not considered/background | 0.192825404  | 0.26866033   | 2 |
| 1972 | P82673;H0Y682;P82673-2                 | 28S ribosomal protein S35, mitochondrial                                                            | MRPS35                      | CTSD/PBS | MRPS35   | not considered/background | 0.534858451  | 0.429498209  | 2 |
| 1973 | P82675;P82675-2                        | 28S ribosomal protein S5, mitochondrial                                                             | MRPS5                       | CTSD/PBS | MRPS5    | not considered/background | 0.205892928  | 0.205892928  | 1 |
| 1974 | P82909;D6R941                          | 28S ribosomal protein S36, mitochondrial                                                            | MRPS36                      | CTSD/PBS | MRPS36   | not considered/background | 0.192825404  | 0.26866033   | 2 |
| 1975 | P82914                                 | 28S ribosomal protein S15, mitochondrial                                                            | MRPS15                      | CTSD/PBS | MRPS15   | not considered/background | 0.534858451  | 0.429498209  | 2 |
| 1976 | P82921                                 | 28S ribosomal protein S21, mitochondrial                                                            | MRPS21                      | CTSD/PBS | MRPS21   | not considered/background | 0.192825404  | 0.26866033   | 2 |
| 1977 | P82932                                 | 28S ribosomal protein S6, mitochondrial                                                             | MRPS6                       | CTSD/PBS | MRPS6    | not considered/background | 0.06474492   | 0.780586726  | 2 |
| 1978 | P82933                                 | 28S ribosomal protein S9, mitochondrial                                                             | MRPS9                       | CTSD/PBS | MRPS9    | not considered/background | 0.06474492   | 0.780586726  | 2 |
| 1979 | P82979;F8V512;F8VZQ9;H0YHG0            | SAP domain-containing ribonucleoprotein                                                             | SARNP                       | CTSD/PBS | SARNP    | not considered/background | 0.06474492   | 0.780586726  | 2 |
| 1980 | P84085;C9J128                          | ADP-ribosylation factor 5                                                                           | ARF5                        | CTSD/PBS | ARF5     | not considered/background | 0.359633613  | 0.337028913  | 2 |
| 1982 | P84157-2;P84157;Q6Z864;K7EQX8          | Matrix-remodeling-associated protein 7                                                              | MXRA7                       | CTSD/PBS | MXRA7    | not considered/background | 0.359633613  | 0.337028913  | 2 |
| 1984 | P98155-2;P98155                        | Very-low-density lipoprotein receptor                                                               | VLDLR                       | CTSD/PBS | VLDLR    | not considered/background | 0.13194352   | 0.121376661  | 2 |
| 1985 | P98172                                 | Ephrin-B1                                                                                           | EFNB1                       | CTSD/PBS | EFNB1    | not considered/background | -0.05376321  | -0.05376321  | 1 |
| 1986 | Q00013-2;Q00013-3;Q00013-3;C9J94;      | 55 kDa erythrocyte membrane protein                                                                 | MFPE1                       | CTSD/PBS | MFPE1    | not considered/background | 0.10701825   | -0.038576651 | 2 |
| 1987 | Q00059;Q00059-2;H7BYN3                 | Transcription factor A, mitochondrial                                                               | TFAM                        | CTSD/PBS | TFAM     | not considered/background | 0.10701825   | -0.038576651 | 2 |
| 1988 | Q00169;F5GWE5;J3L4H1;J3L4S9;J3L4       | Phosphatidylinositol transfer protein alpha isoform                                                 | PITPNA                      | CTSD/PBS | PITPNA   | not considered/background | 0.340163442  | 0.367601483  | 2 |
| 1989 | Q00325-2;Q00325;F8VVM2;F8VWQ0;         | Phosphate carrier protein, mitochondrial                                                            | SLC25A3                     | CTSD/PBS | SLC25A3  | not considered/background | 0.056167306  | 0.056167306  | 2 |
| 1990 | Q00535;Q00535-2                        | Cyclin-dependent-like kinase 5                                                                      | CDK5                        | CTSD/PBS | CDK5     | not considered/background | 0.056167306  | 0.056167306  | 2 |
| 1991 | Q00688;G3V5F2                          | Peptidyl-prolyl cis-trans isomerase FKBP3                                                           | FKBP3                       | CTSD/PBS | FKBP3    | not considered/background | 0.012781018  | 0.018629543  | 2 |
| 1992 | Q00765;G2QK68;B72510;Q00765-2;         | Receptor expression-enhancing protein 5;Receptor expression-enhancing protein                       | REEP5                       | CTSD/PBS | REEP5    | not considered/background | -0.428367161 | -0.327092475 | 2 |
| 1993 | Q01082;A0A087WV01;Q01082-3;Q01082-3    | Spectrin domain-containing protein 1                                                                | SPBN1                       | CTSD/PBS | SPBN1    | not considered/background | -0.210829993 | 0.0200771    | 2 |
| 1994 | Q01469;J6L8B7;A8MUJ1                   | Fatty acid-binding protein, epidermal                                                               | FABP5                       | CTSD/PBS | FABP5    | not considered/background | -0.037591644 | -0.100750859 | 2 |
| 1995 | Q01518-2;Q01518-2;Q5TOR1;Q5TOR7;       | Q Adenyl cyclase-associated protein 1                                                               | CAP1                        | CTSD/PBS | CAP1     | not considered/background | 0.10035721   | 0.00035721   | 1 |
| 1996 | Q01581;D6RIW1                          | Hydroxymethylglutaryl-CoA synthase, cytoplasmic                                                     | HMGCS1                      | CTSD/PBS | HMGCS1   | not considered/background | 0.060462488  | 0.077071473  | 2 |
| 1997 | Q01650;H0Y95;A0A0C4DGL4;G3V4Z2;        | Large neutral amino acid transporter small subunit 1                                                | SLC7A5                      | CTSD/PBS | SLC7A5   | not considered/background | -0.343273746 | -0.343273746 | 2 |
| 1998 | Q01813;Q01813-2;B1APPE;H0Y757;Q:       | ATP-dependent 6-phosphofructokinase, platelet type                                                  | PFKP                        | CTSD/PBS | PFKP     | not considered/background | -0.506578105 | -0.34857237  | 2 |
| 1999 | Q01814-2;Q01814-4;Q01814-5;Q01814-5    | Plasma membrane calcium-translocating ATPase 2                                                      | ATP2B2                      | CTSD/PBS | ATP2B2   | not considered/background | 0.379177329  | 0.379177329  | 1 |
| 2000 | Q01968-2;Q01968;A0A024Y6G38;A0A:       | Inositol polyphosphate 5-phosphatase DCRL-1                                                         | DCRL1                       | CTSD/PBS | DCRL1    | not considered/background | -0.203967142 | -0.203967142 | 1 |
| 2001 | Q02108-2;Q02108;J3KQW7;Q5PIR4;J        | Guanylate cyclase soluble subunit alpha-3                                                           | GUCY1A3                     | CTSD/PBS | GUCY1A3  | not considered/background | -0.203967142 | -0.203967142 | 1 |
| 2002 | Q02156;E9PB82                          | Protein kinase C epsilon type                                                                       | PRKCE                       | CTSD/PBS | PRKCE    | not considered/background | 0.131194352  | 0.121376661  | 2 |
| 2003 | Q02252;Q02252-2;G3V4Z4                 | Methylmalonate-semialdehyde dehydrogenase [acylating], mitochondrial                                | ALDH6A1                     | CTSD/PBS | ALDH6A1  | not considered/background | -0.04208146  | -0.204641566 | 2 |
| 2004 | Q02410-2;Q02410;A0A0D95FA9;A0A0        | Amyloid beta A4 precursor protein-binding family A member 1                                         | APBA1                       | CTSD/PBS | APBA1    | not considered/background | -0.219315609 | -0.137012895 | 2 |
| 2006 | Q02641;Q02641-2;Q02641-3;Q08283        | Voltage-dependent L-type calcium channel subunit beta-1;Voltage-dependent L-type calcium ch         | CACNB1;CACNB2;CACNB4        | CTSD/PBS | CACNB1   | not considered/background | -0.137012895 | -0.230080016 | 2 |
| 2007 | Q02750;Q02750-2;H3BRW9                 | Small specificity mitogen-activated protein kinase kinase 1                                         | MAP2K1                      | CTSD/PBS | MAP2K1   | not considered/background | -0.081720636 | -0.125122061 | 2 |
| 2008 | Q02760;F5H1U3;H0YF62;F5H1U2            | Peptidyl-prolyl cis-trans isomerase FKBP4;Peptidyl-prolyl cis-trans isomerase FKBP4, N-terminally   | FKBP4                       | CTSD/PBS | FKBP4    | not considered/background | -0.05376321  | -0.05376321  | 1 |
| 2009 | Q02809;F5H1U3;H0YF62;F5H1U2            | Procollagen-lysine-2-oxoglutarate 5-dioxygenase 1                                                   | PLOD1                       | CTSD/PBS | PLOD1    | not considered/background | 0.18967111   | 0.251263994  | 2 |
| 2010 | Q02818;C9JIB9-2;C9JIB9-2;C9JIB9-2;     | Nucleobindin-1                                                                                      | RPL6                        | CTSD/PBS | RPL6     | not considered/background | 0.039138394  | -0.097206246 | 2 |
| 2011 | Q02878;F8V869;F8V45;J3UKR5             | 60S ribosomal protein L6                                                                            | AKAP12                      | CTSD/PBS | AKAP12   | not considered/background | 0.061983516  | 0.407057462  | 2 |
| 2012 | Q02952-3;Q02952-2;Q02952               | A-kinase anchor protein 12                                                                          | SLC25A11                    | CTSD/PBS | SLC25A11 | not considered/background | 0.209890007  | 0.202107143  | 2 |
| 2013 | Q02978;J3L1P8;Q02978-2                 | Midochondrial 2-oxoglutarate/malate carrier protein                                                 | PTS                         | CTSD/PBS | PTS      | not considered/background | -0.448961473 | -0.39583053  | 2 |
| 2014 | Q03393;E9PKY8;E9PJM0;EPNN33            | 6-pyruvoyl tetrahydrobiopterin synthase                                                             | GBE1                        | CTSD/PBS | GBE1</   |                           |              |              |   |

|        |                                   |                                                                                               |             |                   |                           |              |              |   |
|--------|-----------------------------------|-----------------------------------------------------------------------------------------------|-------------|-------------------|---------------------------|--------------|--------------|---|
| 2064   | Q13232;H3BPR2                     | Nucleoside diphosphate kinase 3;Nucleoside diphosphate kinase                                 | NME3        | CTSD/PBS NME3     | not considered/background |              |              | 0 |
| 2065   | Q13308-3;Q13308-2;Q13308;Q13308   | Inactive tyrosine-protein kinase 7                                                            | PTK7        | CTSD/PBS PTK7     | not considered/background | -0,265067152 |              | 1 |
| 2066   | Q13363-2;Q13363;D6RAX7;ETESU7;7   | C-terminal-binding protein 1                                                                  | CTBP1       | CTSD/PBS CTBP1    | not considered/background | -0,03343664  | -0,128029389 | 2 |
| 2067   | Q13405;H0Y9P7;E9P7B;E9P9F1        | 395 ribosomal protein L49, mitochondrial                                                      | MRPL49      | CTSD/PBS MRPL49   | not considered/background | -0,48597174  |              | 1 |
| 2068   | Q13409;Q13409-5;Q13409-2;Q13409   | Cytoplasmic dynein 1 intermediate chain 2                                                     | DYNC1I2     | CTSD/PBS DYNC1I2  | not considered/background | -0,196243935 | 0,135126479  | 2 |
| 2069   | Q13423;Q13423;E9PCX7;A0A59 NAD(P) | transhydrogenase, mitochondrial                                                               | NNT         | CTSD/PBS NNT      | not considered/background | -0,00736207  | 0,145908575  | 2 |
| 2070   | Q13432-2;Q13432;K7EUJ3;K7ENB6;C   | Protein unc-119 homolog A;Protein unc-119 homolog B                                           | UNC119B     | CTSD/PBS UNC119   | not considered/background |              |              | 0 |
| 2071   | Q13433;K7E091;Q13433-2            | Zinc transporter ZIP6                                                                         | SLC39A6     | CTSD/PBS SLC39A6  | not considered/background | 0,084744621  | 0,335959521  | 2 |
| 2072   | Q13438-6;Q13438-5;Q13438-2;Q134   | Protein Ose-9                                                                                 | OS9         | CTSD/PBS OS9      | not considered/background |              |              | 0 |
| 2073   | Q13442;F8W6W6                     | 28 kDa heat- and acid-stable phosphoprotein                                                   | PDAP1       | CTSD/PBS PDAP1    | not considered/background | 0,093560176  | -0,132642643 | 2 |
| 2074   | Q13445;K7E84;K7E063               | Transmembrane emp24 domain-containing protein 1                                               | TMED1       | CTSD/PBS TMED1    | not considered/background |              |              | 0 |
| 2075   | Q13454-2;D6R0V0;D6R8J7;D6R1V7;Q   | Tumor suppressor candidate 3                                                                  | TUSC3       | CTSD/PBS TUSC3    | not considered/background |              |              | 0 |
| 2077   | Q13491-4;872613;Q13491-3;872248   | Neuronal membrane glycoprotein M6-b                                                           | GPMB6       | CTSD/PBS GPMB6    | not considered/background | -0,045356989 | 0,146690944  | 2 |
| 2078   | Q13492-3;Q13492-2;Q13492-5;Q134   | Phosphatidylinositol-binding clathrin assembly protein                                        | PICALM      | CTSD/PBS PICALM   | not considered/background | -0,605507809 | -0,562083643 | 2 |
| 2079   | Q13505-3;Q13505;Q13505-2          | Metaxin-1                                                                                     | MTX1        | CTSD/PBS MTX1     | not considered/background | 0,370275897  | 0,234057962  | 2 |
| 2080   | Q13509;A0A084J269;Q13509-2;G3V2   | Tubulin beta 3 chain                                                                          | TUBB3       | CTSD/PBS TUBB3    | not considered/background | -0,221236324 | -0,282380495 | 2 |
| 2081   | Q13526;K7EM45;K7EMU7              | Peptidyl-prolyl cis-trans isomerase NIMA-interacting 1                                        | PIN1        | CTSD/PBS PIN1     | not considered/background | 0,023184369  | -0,197991166 | 2 |
| 2082   | Q13554-2;Q13554-8;Q13554-5;Q135   | Calcium/calmodulin-dependent protein kinase type II subunit beta                              | CAMK2B      | CTSD/PBS CAMK2B   | not considered/background | 0,027861775  | -0,421371433 | 2 |
| 2084   | Q13561;Q13561-3;Q13561-2;F8W16    | Dynactin subunit 5                                                                            | CTCN2       | CTSD/PBS CTCN2    | not considered/background | -0,065143859 | -0,036458318 | 2 |
| 2085   | Q13564-3;Q13564-2;Q13564;Q13564   | NEDD8-activating enzyme E1 regulatory subunit                                                 | NAE1        | CTSD/PBS NAE1     | not considered/background |              |              | 0 |
| 2086   | Q13572;G3V588;G3V5A3;G3V4M9;Q1    | Inositol-tetrakisphosphate 1-kinase                                                           | ITPK1       | CTSD/PBS ITPK1    | not considered/background |              |              | 0 |
| 2087   | Q13585                            | Melatonin-related receptor                                                                    | GRP50       | CTSD/PBS GRP50    | not considered/background | 0,047119549  | -0,035483152 | 2 |
| 2088   | Q13618-2;Q13618;Q13618-3;A0A087   | Cullin-3                                                                                      | CUL3        | CTSD/PBS CUL3     | not considered/background | -0,142082684 | 0,040229845  | 2 |
| 2089   | Q13620-3;Q13620-1;A0A669KX44;K4   | Cullin-4B                                                                                     | CUL4B       | CTSD/PBS CUL4B    | not considered/background | -0,339418161 | -0,20394218  | 2 |
| 2090   | Q13641                            | Trophoblast glycoprotein                                                                      | TPBG        | CTSD/PBS TPBG     | not considered/background | -0,284581018 | -0,207518077 | 2 |
| 2091   | Q13642-4;Q13642-5;Q13642-1;Q136   | Four and a half LIM domains protein 1                                                         | FHL1        | CTSD/PBS FHL1     | not considered/background | -0,107197112 | -0,065372814 | 2 |
| 2092   | Q13724;Q13724-2;Q13724;Q13724     | Mannosyl-oligosaccharide glucosidase                                                          | MOGS        | CTSD/PBS MOGS     | not considered/background | 0,131326075  | 0,247696701  | 2 |
| 2093   | Q13740-2;Q13740;F5GXJ9;H7C543;C   | CD166 antigen                                                                                 | ALCAM       | CTSD/PBS ALCAM    | not considered/background | 0,087598618  | 0,286761698  | 2 |
| 2094   | Q13825;Q13825-2                   | Methylglutacetyl-CoA hydratase, mitochondrial                                                 | AUH         | CTSD/PBS AUH      | not considered/background | 0,18337572   | 0,10152474   | 2 |
| 2095   | Q13867;J3KSDB;K7ES02;K7ESE8;K7E   | Bleomycin hydrolase                                                                           | BLMH        | CTSD/PBS BLMH     | not considered/background | 0,14130198   | 0,004812191  | 2 |
| 2097   | Q13907-2;Q13907;C91D53            | Isopentenyl-diphosphate Delta-isomerase 1                                                     | IDH1        | CTSD/PBS IDH1     | not considered/background | -0,060412323 | 0,284528301  | 2 |
| 2098   | Q14008-2;Q14008;Q14008-3;E9PQY5   | Cytoskeleton-associated protein 5                                                             | CXAP5       | CTSD/PBS CXAP5    | not considered/background | -0,123009682 | 0,099741788  | 2 |
| 2100   | Q14019;H3BTS8                     | Cactinin-like protein                                                                         | COTL1       | CTSD/PBS COTL1    | not considered/background |              |              | 0 |
| 2101   | Q14088                            | Ras-related protein Rab-33A                                                                   | RAB33A      | CTSD/PBS RAB33A   | not considered/background |              |              | 0 |
| 2102   | Q14103-3;Q14103;H0Y9A6;D6RAF8;H   | Heterogeneous nuclear ribonucleoprotein D0                                                    | HNRNP0      | CTSD/PBS HNRNP0   | not considered/background | -0,039888682 | 0,141907573  | 2 |
| 2103   | Q14118                            | Dystroglycan;Alpha-dystroglycan;Beta-dystroglycan                                             | DAG1        | CTSD/PBS DAG1     | not considered/background |              |              | 0 |
| 2104   | Q14165;F5H158;H0YG07;F5GX14       | Malactin                                                                                      | MLEC        | CTSD/PBS MLEC     | not considered/background | 0,122076304  | -0,035060797 | 2 |
| 2105   | Q14166                            | Tubulin-tyrosine ligase-like protein 12                                                       | TLL12       | CTSD/PBS TLL12    | not considered/background | -0,19794744  |              | 1 |
| 2107   | Q14194;E9PD68                     | Dihydropyrimidinase-related protein 1                                                         | CRMP1       | CTSD/PBS CRMP1    | not considered/background | -0,128440188 | -0,001874286 | 2 |
| 2108   | Q14194-2                          | Dihydropyrimidinase-related protein 1                                                         | CRMP1       | CTSD/PBS CRMP1    | not considered/background |              |              | 0 |
| 2109   | Q14195-2;Q14195;H0YB74;H0YB87;Q   | Dihydropyrimidinase-related protein 3                                                         | DPSL3       | CTSD/PBS DPSL3    | not considered/background | -0,094818567 | -0,156914315 | 2 |
| 2110   | Q14203-3;Q14203-6;Q14203;Q14203   | Dynactin subunit 1                                                                            | DCTN1       | CTSD/PBS DCTN1    | not considered/background | -0,079981162 | 0,055321434  | 2 |
| 2111   | Q14204;A0A2R8Y0V6;A0A2R8Y27;A0    | Cytoplasmic dynein 1 heavy chain 1                                                            | DYNC1H1     | CTSD/PBS DYNC1H1  | not considered/background | -0,107958761 | 0,072615592  | 2 |
| 2112   | Q14240;Q14240-2;F7EGG2;J3KSN7     | Eukaryotic initiation factor 4A-II;Eukaryotic initiation factor 4A-II, N-terminally processed | EIF4A2      | CTSD/PBS EIF4A2   | not considered/background | -0,097285794 | -0,279292991 | 2 |
| 2113   | Q14247-3;Q14247-1;Q14247-2;H0VEV2 | Src substrate cortactin                                                                       | CTTN        | CTSD/PBS CTTN     | not considered/background | -0,743834723 | -0,632175135 | 2 |
| 2114   | Q14257;Q14257-2;H0YL43;ABMMX68    | Reticulocalbin-2                                                                              | RCN2        | CTSD/PBS RCN2     | not considered/background | 0,320542442  | 0,118570303  | 2 |
| 2115   | Q14318-2;Q14318;U3KQ64;A0A0A00    | Peptidyl-prolyl cis-trans isomerase FKBP8                                                     | FKBP8       | CTSD/PBS FKBP8    | not considered/background | 0,019773069  | -0,158051958 | 2 |
| 2117   | Q14344;Q14344-2                   | Guanine nucleotide-binding protein subunit alpha-13                                           | GNA13       | CTSD/PBS GNA13    | not considered/background |              |              | 1 |
| 2118   | Q14353-2;Q14353;A0A1W2PR36        | Guanidinocacetate N-methyltransferase                                                         | GAMT        | CTSD/PBS GAMT     | not considered/background |              |              | 0 |
| 2119   | Q14376;Q5QPP1;Q5QPP3;Q5QPP4;Q1    | UDP-glucose 4-epimerase                                                                       | GALE        | CTSD/PBS GALE     | not considered/background | 0,441695937  | 0,510683145  | 2 |
| 2120   | Q14444-2;Q14444;E9PLA9;G3V153     | Caprin-1                                                                                      | CAPRIN1     | CTSD/PBS CAPRIN1  | not considered/background |              |              | 0 |
| 2121   | Q14542;Q14542-3;G5E943            | Equilibrative nucleoside transporter 2                                                        | SLC29A2     | CTSD/PBS SLC29A2  | not considered/background |              |              | 0 |
| 2122   | Q14554;Q14554-2                   | Protein disulfide-isomerase A5                                                                | PDIA5       | CTSD/PBS PDIA5    | not considered/background |              |              | 0 |
| 2123   | Q14558-2;Q14558;C91WQ3            | Phosphoribosyl pyrophosphate synthase-associated protein 1                                    | PRPSA1      | CTSD/PBS PRPSA1   | not considered/background |              |              | 0 |
| 2124   | Q5T1B5;Q14643;H0Y2V5;Q5T1B3;H1    | Type I inositol 1,4,5-trisphosphate 5-phosphatase                                             | INPP5A      | CTSD/PBS INPP5A   | not considered/background | 0,253989266  |              | 1 |
| 2127   | Q14696;H0YL14;Q14696-2            | LDL receptor MED5                                                                             | MESDC2      | CTSD/PBS MESDC2   | not considered/background | 0,421568673  | 0,163865801  | 2 |
| 2128   | Q14697;F5H6X6;Q14697-3            | Neutral alpha-galactosidase AB                                                                | GANAB       | CTSD/PBS GANAB    | not considered/background | 0,005615567  | 0,093925239  | 2 |
| 2130   | Q14699;G3XAJ6;C9JHG2;C9JRM3;U3K   | Raftlin                                                                                       | RFTN1       | CTSD/PBS RFTN1    | not considered/background | -0,145748961 | -0,332163688 | 2 |
| 2131   | Q14789-4;Q14789-3;Q14789;Q14789   | Golgin subfamily B member 1                                                                   | GOLGB1      | CTSD/PBS GOLGB1   | not considered/background |              |              | 0 |
| 2132   | Q14847;Q14847-2;C9J9W2;Q14847-1   | LIM and SH3 domain protein 1                                                                  | LASP1       | CTSD/PBS LASP1    | not considered/background | 0,204766751  | -0,207018226 | 2 |
| 2133   | Q14874;Q14874-2;J3K7M9;J3QR48;J1  | Mortalin subunit beta-1                                                                       | KPNB1       | CTSD/PBS KPNB1    | not considered/background | -0,207327859 | -0,032065434 | 2 |
| 2134   | Q14982-2;Q14982-1;Q14982-4;Q14982 | Opioid-binding protein/cell adhesion molecule                                                 | OPCBM1      | CTSD/PBS OPCBM1   | not considered/background | 0,133037379  | -0,004896843 | 2 |
| 2135   | Q14CK7-2;Q14CK7                   | N-alpha-acetyltransferase 25, NaB auxiliary subunit                                           | NAA25       | CTSD/PBS NAA25    | not considered/background |              |              | 0 |
| 2136   | Q15006;H0Y459                     | ER membrane protein complex subunit 2                                                         | EMC2        | CTSD/PBS EMC2     | not considered/background | 0,182565182  | 0,607880446  | 2 |
| 2137   | Q15008;Q15008-4;Q15008-3;Q15008   | 26S proteasome non-ATPase regulatory subunit 6                                                | PSMD6       | CTSD/PBS PSMD6    | not considered/background | 0,230571942  | -0,126047755 | 2 |
| 2138   | Q15018                            | BRIS complex subunit Abro1                                                                    | FAM175B     | CTSD/PBS FAM175B  | not considered/background |              |              | 0 |
| 2139   | Q15019-2;Q15019-3;Q15019;B5MCK    | Septin-2                                                                                      | SEPT2       | CTSD/PBS SEPT2    | not considered/background |              |              | 0 |
| 2140   | Q15031;E9PHM2;A0A499H12;A0A499H   | Probable leucine-tRNA ligase, mitochondrial                                                   | LARS2       | CTSD/PBS LARS2    | not considered/background | 0,215989154  | 0,056266281  | 2 |
| 2141   | Q15042-3;Q15042-1;Q15042-4        | Rab3 GTPase-activating protein catalytic subunit                                              | RAB3GAP1    | CTSD/PBS RAB3GAP1 | not considered/background |              |              | 0 |
| 2142   | Q15046;Q15046-2;H3BVA8;J3KRL2;H1  | Lysine-tRNA ligase                                                                            | KARS        | CTSD/PBS KARS     | not considered/background | 0,180657108  | 0,21838001   | 2 |
| 2143   | Q15056-2;Q15056                   | Eukaryotic translation initiation factor 4H                                                   | EIF4H       | CTSD/PBS EIF4H    | not considered/background | 0,158466295  | -0,044184258 | 2 |
| 2144   | Q15067-2;Q15067;Q15067-3;K7ENF1   | Peroxisomal acyl-coenzyme A oxidase 1                                                         | ACOX1       | CTSD/PBS ACOX1    | not considered/background | 0,057276965  | -0,134089481 | 2 |
| 2145   | Q15075                            | Early endosome antigen 1                                                                      | EEA1        | CTSD/PBS EEA1     | not considered/background | -0,17830611  | 0,021028307  | 2 |
| 2146   | Q15084-3;Q15084;Q15084-4;Q15084   | Protein disulfide-isomerase A6                                                                | PDIA6       | CTSD/PBS PDIA6    | not considered/background | 0,147176237  | 0,023035214  | 2 |
| 2147   | Q15102;M0M389;M0R1K3;M0QZT7;M     | Platelet-activating factor acetylhydrolase IB subunit gamma                                   | PAFAH1B3    | CTSD/PBS PAFAH1B3 | not considered/background | 0,016129428  | -0,015354834 | 2 |
| 2148   | Q15111;Q15111-2;H3B8W4;Q16143     | Phosphoribosyl pyrophosphate synthase C                                                       | PRPS1       | CTSD/PBS PRPS1    | not considered/background |              |              | 0 |
| 2149   | Q15118;Q15118-2;C9JYB4;C9JKT3;F8  | [Pyruvate dehydrogenase (acetyl-transferring)] kinase isozyme 1, mitochondrial                | PDHK1       | CTSD/PBS PDHK1    | not considered/background | 0,007769594  | 0,204914671  | 2 |
| 2150   | Q15120;Q15120-2                   | [Pyruvate dehydrogenase (acetyl-transferring)] kinase isozyme 3, mitochondrial                | PDHK3       | CTSD/PBS PDHK3    | not considered/background |              |              | 0 |
| 2151   | Q15121-2;Q15121-1;81AKZ5          | Astrocytic phosphoprotein PEA-15                                                              | PEA15       | CTSD/PBS PEA15    | not considered/background |              |              | 0 |
| 2152   | Q15125;C9J719;C9J178;A0A494CF03   | 3-beta-hydroxysteroid-Delta(18),Delta(7)-isomerase                                            | EBP         | CTSD/PBS EBP      | not considered/background |              |              | 1 |
| 2153   | Q15126                            | Phosphomevalonate kinase                                                                      | PMVK        | CTSD/PBS PMVK     | not considered/background |              |              | 0 |
| 2154   | Q15147-2;Q15147;Q15147-5;Q15147   | 1-Phosphomevalonate kinase 4,5-bisphosphate phosphodiesterase beta-4                          | PLCB4       | CTSD/PBS PLCB4    | not considered/background |              |              | 0 |
| 2155   | Q15149-2;Q15149-1;Q15149-3;Q15149 | Protein PLEC                                                                                  | PLEC        | CTSD/PBS PLEC     | not considered/background |              |              | 0 |
| 2156   | Q15173-2;Q15173;E9PNY5;E9PNQ5     | Serine/threonine-protein phosphatase 2A 56 kDa regulatory subunit beta isoform                | PPP2R5B     | CTSD/PBS PPP2R5B  | not considered/background | 0,129085148  | 0,183490401  | 2 |
| 2157   | Q15181;Q5SQ76                     | Inorganic pyrophosphatase                                                                     | PPA1        | CTSD/PBS PPA1     | not considered/background | -0,096289387 | -0,011495639 | 2 |
| 2158   | Q15223;Q15223-3;Q15223-2          | Nectin-1                                                                                      | PVRL1       | CTSD/PBS PVRL1    | not considered/background | 0,118093889  | 0,000577193  | 2 |
| 2159   | Q15233-2;Q15233;C9JZL7;H7C367;C9  | Non-POU domain-containing octamer-binding protein                                             | NONO        | CTSD/PBS NONO     | not considered/background | 0,42320165   |              | 1 |
| 2160   | Q15276;Q15276-2;K7ENJ9;J3L2B8     | Rab GTPase-binding effector protein 1                                                         | RABEP1      | CTSD/PBS RABEP1   | not considered/background |              |              | 1 |
| 2161   | Q15286;F5H157;Q15286-2;E9PQD7;E   | Ras-related protein Rab-35                                                                    | RAB35       | CTSD/PBS RAB35    | not considered/background | 0,055889758  | 0,051100179  | 2 |
| 2162   | Q15293;Q15293-2;E9PPZ7            | Reticulocalbin-1                                                                              | RCN1        | CTSD/PBS RCN1     | not considered/background | 0,028710586  | 0,135855465  | 2 |
| 2163   | Q15363;F5G5E9;F5G502              | Transmembrane emp24 domain-containing protein 2                                               | TMED2       | CTSD/PBS TMED2    | not considered/background | 0,08821771   | -0,056309382 | 2 |
| 2164   | Q15365;F8V720;H3B8P4;C9K0A2;F8W   | Poly(C)-binding protein 1                                                                     | PCBP1       | CTSD/PBS PCBP1    | not considered/background | 0,09099111   | -0,114233744 | 2 |
| 2165   | Q15366-4;Q15366-3;Q15366-7;Q1531  | Poly(C)-binding protein 2;Poly(C)-binding protein 3                                           | PCBP2;PCBP3 | CTSD/PBS PCBP2    | not considered/background | -0,019243481 | 0,012737352  | 2 |
| 2166   | Q15370;Q15370-2;B8Z2U8;J3L0M9;A   | CtRan transcription elongation factor B polypeptide 2                                         | TCEB2       | CTSD/PBS TCEB2    | not considered/background |              |              | 0 |
| 2167   | Q15382;C9J931;C9J469;F8WB13       | GTP-binding protein Rheb                                                                      | RHEB        | CTSD/PBS RHEB     | not considered/background | 0,07956585   |              | 1 |
| 2169   | Q15417;Q15417-3;Q15417-2;E9PDUE   | Calponin-3;Calponin                                                                           | CNN3        | CTSD/PBS CNN3     | not considered/background |              |              | 0 |
| 2170   | Q15435;Q15435-3;C9J973;C9J177;Q1  | Protein phosphatase 1 regulatory subunit 7                                                    | PPP1R7      | CTSD/PBS PPP1R7   | not considered/background | 0,117030603  | -0,331246599 | 2 |
| 2171   | Q15555-5;Q15555-4;Q15555-3;Q1555  | Microtubule-associated protein RP/EB family member 2                                          | MAPRE2      | CTSD/PBS MAPRE2   | not considered/background | 0,092342769  | -0,056309382 | 2 |
| 2172   | Q15691                            | Microtubule-associated protein RP/EB family member 1                                          | MAPRE1      | CTSD/PBS MAPRE1   | not considered/background | -0,083431637 | -0,210513552 | 2 |
| 2173   | Q15738;C9JDR0                     | Sterol 4-alpha-carboxylate 3-dehydrogenase, decarboxylating                                   | NSDHL       | CTSD/PBS NSDHL    | not considered/background | 0,157690514  | 0,096005394  | 2 |
| 2174   | Q15768                            | Ephrin-B3                                                                                     | EFNB3       | CTSD/PBS EFNB3    | not considered/background | 0,146264195  | -0,155101558 | 2 |
| 2175   | Q15771;E9P118;E9PRF7;E9PNB9;E9P5  | Ras-related protein Rab-30                                                                    | RAB30       | CTSD/PBS RAB30    | not considered/background |              |              | 0 |
| 2176   | Q15800;D6RDP9;D6R952;Q15800-2;2   | Methylsterol monooxygenase 1                                                                  | MSMO1       | CTSD/PBS MSMO1    | not considered/background |              |              | 0 |
| 2178   | Q15818                            | Neuronal pentraxin-1                                                                          | NPTX1       | CTSD/PBS NPTX1    | not considered/background |              |              | 0 |
| 2179   | Q15819;G3V113;H0YBP9;ESRF11;D6R   | Ubiquitin-conjugating enzyme E2 variant 2                                                     | UBE2V2      | CTSD/PBS UBE2V2   | not considered/background | -0,163801153 | -0,261590989 | 2 |
| 2181   | Q15843                            | NEDD8                                                                                         | NEDD8       | CTSD/PBS NEDD8    | not considered/background |              |              | 0 |
| 2182</ |                                   |                                                                                               |             |                   |                           |              |              |   |

|      |                                                                                                                                   |                                                                                              |               |          |                           |                           |              |              |   |
|------|-----------------------------------------------------------------------------------------------------------------------------------|----------------------------------------------------------------------------------------------|---------------|----------|---------------------------|---------------------------|--------------|--------------|---|
| 2220 | Q35XM5;Q35XM5-2;H3BQ17;H3BT52;+ Inactive hydroxysteroid dehydrogenase-like protein 1                                              | HSDL1                                                                                        | CTSD/PBS      | HSDL1    | not considered/background | 0,223793216               | 0,228824326  | 2            |   |
| 2221 | Q32CW7;A0A0758736;Q5SQV0                                                                                                          | Tubulin beta-8 chain                                                                         | TUBB8         | CTSD/PBS | TUBB8                     | not considered/background | -0,341372624 | -0,473215434 | 2 |
| 2223 | Q32C08;Q32C08-2;Q32C08-3;MOROC Mitochondrial import inner membrane translocase subunit TIM50                                      | TIM50                                                                                        | CTSD/PBS      | TIM50    | not considered/background | 0,497331235               | 0,04110537   | 2            |   |
| 2224 | Q32CW2;F8W1F1;7;B9A055;U3KQ88                                                                                                     | Galectin-related protein Galectin 4                                                          | LGAL1         | CTSD/PBS | LGAL1                     | not considered/background | -0,08827731  | -0,08827731  | 1 |
| 2226 | Q4G0F5;H0YC7                                                                                                                      | Vacuolar protein sorting-associated protein 26B                                              | VP526B        | CTSD/PBS | VP526B                    | not considered/background | -0,042501373 | 0,299968733  | 2 |
| 2227 | Q4G0N4;Q4G0N4-2;Q4G0N4-3;B7Z8V NAD kinase 2, mitochondrial                                                                        | NADK2                                                                                        | CTSD/PBS      | NADK2    | not considered/background | 0,260748328               | 0,270521188  | 2            |   |
| 2228 | Q4J6C6-4;Q4J6C6-5;Q4J6C6-6;Q4J6C6-3 Prolyl endopeptidase-like                                                                     | PREPL                                                                                        | CTSD/PBS      | PREPL    | not considered/background |                           |              | 0            |   |
| 2229 | Q4KMP7                                                                                                                            | TBC1 domain family member 10B                                                                | TBC1D10B      | CTSD/PBS | TBC1D10B                  | not considered/background |              |              | 0 |
| 2230 | Q52LJ0-1;Q52LJ0                                                                                                                   | Protein FAM988                                                                               | FAM988        | CTSD/PBS | FAM988                    | not considered/background |              |              | 0 |
| 2232 | Q53FP2                                                                                                                            | Transmembrane protein 35                                                                     | TMEM35        | CTSD/PBS | TMEM35                    | not considered/background | 0,05963216   | -0,044044333 | 2 |
| 2233 | Q53GQ0;A0A081B0G9;A0A1B0GVY6;+ Very-long-chain 3-oxoacyl-CoA reductase                                                            | HSD17B12                                                                                     | CTSD/PBS      | HSD17B12 | not considered/background | -0,028542895              | -0,044184258 | 2            |   |
| 2234 | Q53GT1;Q53GT1-3;C91191                                                                                                            | Kelch-like protein 22                                                                        | KLHL22        | CTSD/PBS | KLHL22                    | not considered/background |              |              | 0 |
| 2235 | Q53H12;Q53H12-2;E9PC15;A0A383 Acylglycerol kinase, mitochondrial                                                                  | AGK                                                                                          | CTSD/PBS      | AGK      | not considered/background | 0,331004973               | 0,331354374  | 2            |   |
| 2236 | Q56ZR1                                                                                                                            | Beta-actin-like protein 2                                                                    | ACTBL2        | CTSD/PBS | ACTBL2                    | not considered/background |              |              | 0 |
| 2237 | Q56VL3;D6RD77;J3KPI9;Q56VL3-2                                                                                                     | OClA domain-containing protein 2                                                             | OClAD2        | CTSD/PBS | OClAD2                    | not considered/background | 0,300065137  | 0,236112563  | 2 |
| 2238 | Q58EX2-2;Q58EX2-3;Q58EX2;Q58EX2- Protein sideick-2                                                                                | SDK2                                                                                         | CTSD/PBS      | SDK2     | not considered/background |                           |              | 0            |   |
| 2240 | Q59EK9-4;Q59EK9-3;Q59EK9-5;Q59EK9 RUN domain-containing protein 3A                                                                | RUND3CA                                                                                      | CTSD/PBS      | RUND3CA  | not considered/background |                           |              | 0            |   |
| 2241 | Q59I23;Q86KCS;J3KTC6;J3KTD1                                                                                                       | Transmembrane protein 97                                                                     | TMB97         | CTSD/PBS | TMB97                     | not considered/background | -0,031312013 | -0,139076515 | 1 |
| 2243 | Q58IH7-3;Q58IH7-2;Q58IH7-4;Q58IH7- Protein WF18                                                                                   | YIF18                                                                                        | CTSD/PBS      | YIF18    | not considered/background |                           |              | 0            |   |
| 2244 | Q58E52-2;Q58E52;C91WU9;Q58E52-3 Mesoderm-specific transcript homolog protein                                                      | MEST                                                                                         | CTSD/PBS      | MEST     | not considered/background | 0,040404333               | 0,113410835  | 2            |   |
| 2246 | Q5GH76                                                                                                                            | XK-related protein 4                                                                         | XKR4          | CTSD/PBS | XKR4                      | not considered/background |              |              | 0 |
| 2247 | Q9UNF1-2;Q5H909;Q9UNF1;Q5H907                                                                                                     | Melanoma-associated antigen D2                                                               | MAGED2        | CTSD/PBS | MAGED2                    | not considered/background | 0,122738972  | 0,099602657  | 2 |
| 2248 | Q5HYH8;C9JXMG                                                                                                                     | Rab-like protein 3                                                                           | RABL3         | CTSD/PBS | RABL3                     | not considered/background |              |              | 0 |
| 2249 | Q5IRAE;Q5IRAE-2;A0A040MRH6;Q5IR Melanoma inhibitory activity protein 3                                                            | MI3                                                                                          | CTSD/PBS      | MI3      | not considered/background | -0,003350941              | 0,102573682  | 2            |   |
| 2250 | Q5IRK3;Q5IRK3-2;Q5IRK3-3;A0A0A0 Presenque protease, mitochondrial                                                                 | PITRM1                                                                                       | CTSD/PBS      | PITRM1   | not considered/background | 0,336283388               | 0,312999312  | 2            |   |
| 2251 | Q5I9H3-3;Q5I9H3-2;Q5I9H3;H7BVC3; W0 repeat-containing protein 1                                                                   | WDRA4                                                                                        | CTSD/PBS      | WDRA4    | not considered/background |                           |              | 0            |   |
| 2252 | Q5ITJ3-3;Q5ITJ3;Q5ITJ3-2                                                                                                          | Cytochrome c oxidase assembly factor 6 homolog                                               | COA6          | CTSD/PBS | COA6                      | not considered/background |              |              | 0 |
| 2253 | Q5IJT9                                                                                                                            | Alanine-tRNA ligase, mitochondrial                                                           | AARS2         | CTSD/PBS | AARS2                     | not considered/background |              | 0,354630352  | 1 |
| 2254 | Q92796;Q5IUW8;Q92796-3;Q92796-2                                                                                                   | Disks large homolog 3                                                                        | DLG3          | CTSD/PBS | DLG3                      | not considered/background | -0,020808742 |              | 1 |
| 2257 | Q9NV52-3;Q9NV52;Q5QPA5;Q9NV52-2 28S ribosomal protein S18a, mitochondrial                                                         | MRPS18A                                                                                      | CTSD/PBS      | MRPS18A  | not considered/background |                           |              | 0            |   |
| 2258 | Q5QPM9;Q5QPM7;Q92530                                                                                                              | Proteasome inhibitor P31 subunit                                                             | PSMF1         | CTSD/PBS | PSMF1                     | not considered/background |              |              | 0 |
| 2259 | Q5RII5-2;Q5RII5-2                                                                                                                 | Cytochrome c oxidase protein 20 homolog                                                      | CORX2         | CTSD/PBS | CORX2                     | not considered/background | 0,407950917  |              | 1 |
| 2260 | Q5N0X5;Q5N0X5-2                                                                                                                   | Neural proliferation differentiation and control protein 1                                   | NPOC1         | CTSD/PBS | NPOC1                     | not considered/background | 0,495548866  |              | 1 |
| 2261 | Q5SQO0-5;Q5SQO0-4;Q5SQO0;Q5SQO0-7                                                                                                 | Alpha-tubulin N-acetyltransferase 1                                                          | ATAT1         | CTSD/PBS | ATAT1                     | not considered/background | -0,205579975 | -0,203890227 | 2 |
| 2262 | Q5SW79;Q5SW79-3;Q5SW79;H7QY2                                                                                                      | Centrosomal protein of 170 kDa                                                               | CEP170        | CTSD/PBS | CEP170                    | not considered/background | -0,009262921 | 0,083294071  | 2 |
| 2263 | Q5YVC1                                                                                                                            | Clavesin-2                                                                                   | CLVS2         | CTSD/PBS | CLVS2                     | not considered/background | 0,287708866  |              | 1 |
| 2264 | Q5TOD9;Q5TOD9-2                                                                                                                   | Tumor protein p63-regulated gene 1-like protein                                              | TPRG1L        | CTSD/PBS | TPRG1L                    | not considered/background | -0,514552563 | -0,37717929  | 2 |
| 2265 | Q5T123;Q9H299                                                                                                                     | SH3 domain-binding glutamic acid-rich-like protein 3                                         | SH3BGL3       | CTSD/PBS | SH3BGL3                   | not considered/background | -0,308162142 |              | 1 |
| 2269 | Q5T440                                                                                                                            | Putative transferase CAF17, mitochondrial                                                    | IBAS7         | CTSD/PBS | IBAS7                     | not considered/background |              |              | 0 |
| 2270 | Q5T453-3;Q5T457-4;Q5T457-3;Q5T457-4                                                                                               | U3 ubiquitin-protein ligase UBRA4                                                            | UBRA4         | CTSD/PBS | UBRA4                     | not considered/background |              |              | 0 |
| 2271 | Q5T5C0-3;Q5T5C0-2;Q5T5C0;Q3B794                                                                                                   | Syntaxin-binding protein 5                                                                   | STXBPS        | CTSD/PBS | STXBPS                    | not considered/background |              | -0,331017236 | 1 |
| 2272 | Q5T6H7;Q9NQW7-3;Q9NQW7;Q9NQW7                                                                                                     | Xaa-Pro aminopeptidase 1                                                                     | XPNPEP1       | CTSD/PBS | XPNPEP1                   | not considered/background | -0,198394323 | -0,209016592 | 2 |
| 2273 | Q5T749                                                                                                                            | Keratinocyte proline-rich protein                                                            | KPRP          | CTSD/PBS | KPRP                      | not considered/background |              |              | 0 |
| 2274 | Q5T8A0;Q9Y399                                                                                                                     | 28S ribosomal protein S2, mitochondrial                                                      | MRPS2         | CTSD/PBS | MRPS2                     | not considered/background | 0,845831239  | 0,58582116   | 2 |
| 2276 | Q5T9L3;Q5T9L3-2;E9PM62;Q5T9L3-3                                                                                                   | Protein wntless homolog                                                                      | WLS           | CTSD/PBS | WLS                       | not considered/background |              | -0,233642683 | 1 |
| 2277 | Q5TAM7;Q9H954;B7ZB15;B7ZB14;B7ZB15                                                                                                | Calcium-binding protein 39-like                                                              | CAB39L        | CTSD/PBS | CAB39L                    | not considered/background |              |              | 0 |
| 2278 | Q5TB83;Q9HD45                                                                                                                     | Transmembrane 9 superfamily member 3                                                         | TMB9F3        | CTSD/PBS | TMB9F3                    | not considered/background | -0,103697831 |              | 0 |
| 2280 | Q5TH69                                                                                                                            | Brefeldin A-inhibited guanine nucleotide-exchange protein 3                                  | ARFGEP3       | CTSD/PBS | ARFGEP3                   | not considered/background |              |              | 0 |
| 2281 | Q5VWJ9                                                                                                                            | Sorting nexin-30                                                                             | SNX30         | CTSD/PBS | SNX30                     | not considered/background |              |              | 0 |
| 2282 | Q5VWZ2;Q5VWZ2-2                                                                                                                   | Lysophospholipase-like protein                                                               | LYPLA1        | CTSD/PBS | LYPLA1                    | not considered/background | 0,390444758  | -0,231186613 | 2 |
| 2284 | Q7L5L23;Q5VZM2-2;Q5VZM0;Q5VZM2                                                                                                    | Ras-related GTP-binding protein A; Ras-related GTP-binding protein B                         | RAGA;RRAGB    | CTSD/PBS | RAGA                      | not considered/background |              | -0,147176427 | 1 |
| 2285 | Q9HAG4;Q5VZB0;A0A087WUM5                                                                                                          | Glycol-associated plant pathogenesis-related protein 1                                       | GLPR2         | CTSD/PBS | GLPR2                     | not considered/background |              |              | 0 |
| 2286 | Q5W111;Q5W111-2                                                                                                                   | SPRY domain-containing protein 7                                                             | SPRYD7        | CTSD/PBS | SPRYD7                    | not considered/background | 0,164528861  |              | 1 |
| 2287 | Q5XUW1-2;Q5XUW1;K7ELO1                                                                                                            | F-box/WDR repeat-containing protein 9                                                        | FXW9          | CTSD/PBS | FXW9                      | not considered/background |              |              | 0 |
| 2288 | Q66K74;Q66K74-2;M0R1M7                                                                                                            | Microtubule-associated protein 15; MAP15 heavy chain; MAP15 light chain                      | MAP15         | CTSD/PBS | MAP15                     | not considered/background | -0,165984617 | 0,154634403  | 2 |
| 2289 | Q68D91-1;Q68D91-2                                                                                                                 | Metallo-beta-lactamase domain-containing protein 2                                           | MBLAC2        | CTSD/PBS | MBLAC2                    | not considered/background | 0,032947164  | -0,195347598 | 2 |
| 2291 | Q6DKK2;K7EJA1                                                                                                                     | Tetratricopeptide repeat protein 19, mitochondrial                                           | TTC19         | CTSD/PBS | TTC19                     | not considered/background |              | 0,783737611  | 1 |
| 2292 | Q6F5E8;Q6F5E8-2;R4GMZ7                                                                                                            | Leucine-rich repeat-containing protein 16C                                                   | RLTPR         | CTSD/PBS | RLTPR                     | not considered/background |              |              | 0 |
| 2293 | Q6IAA8;F5GX19;F5H3Y3;H0YF11;F5H4                                                                                                  | Regulator complex protein LAMTOR1                                                            | LAMTOR1       | CTSD/PBS | LAMTOR1                   | not considered/background | -0,021423608 | -0,2880632   | 2 |
| 2294 | Q6KCM7;Q6KCM7-4;Q6KCM7-5;Q6K61                                                                                                    | Calcium-binding mitochondrial carrier protein ScaMC-2                                        | SLC25A25      | CTSD/PBS | SLC25A25                  | not considered/background | 0,190425227  |              | 1 |
| 2295 | Q6K807;F6T1Q0;Q6L807-2                                                                                                            | 2,5-phosphodiesterase 12                                                                     | PDE12         | CTSD/PBS | PDE12                     | not considered/background | 0,400428623  | 0,018278839  | 2 |
| 2296 | Q6K5J0                                                                                                                            | Calcium-activated family 31 glycosylase KIAA1161                                             | KIAA1161      | CTSD/PBS | KIAA1161                  | not considered/background |              |              | 0 |
| 2298 | Q6NUK1;Q6NUK1-2;A0A383IUB6;J3K1                                                                                                   | Calcium-binding mitochondrial carrier protein ScaMC-1                                        | SLC25A24      | CTSD/PBS | SLC25A24                  | not considered/background | 0,178873958  | 0,323678424  | 2 |
| 2299 | Q6NUQ4-2;Q6NUQ4;H7B210;H7COZ6;+ Transmembrane protein 214                                                                         | TMEM214                                                                                      | CTSD/PBS      | TMEM214  | not considered/background |                           |              | 0            |   |
| 2300 | Q6NVY1;Q6NVY1-2;B8Z220;B9A058;F8 3-hydroxyisobutyryl-CoA hydrolase, mitochondrial                                                 | HIBCH                                                                                        | CTSD/PBS      | HIBCH    | not considered/background | 0,235972083               | 0,339911093  | 2            |   |
| 2301 | Q6P1L8                                                                                                                            | 39S ribosomal protein L14, mitochondrial                                                     | MRPL14        | CTSD/PBS | MRPL14                    | not considered/background |              |              | 0 |
| 2302 | Q6P1M0;Q6P1M0-2                                                                                                                   | Long-chain fatty acid transport protein 4                                                    | SLC27A4       | CTSD/PBS | SLC27A4                   | not considered/background | 0,124857467  | 0,125399734  | 2 |
| 2303 | Q6P1M0-2;Q6P1M0;K7EY5;K7EMP1                                                                                                      | Coiled-coil and C2 domain-containing protein 1A                                              | CC2D1A        | CTSD/PBS | CC2D1A                    | not considered/background |              |              | 0 |
| 2304 | Q6P4A7;Q6P4A7-2;B1AMN7;Q6P4A7-2                                                                                                   | Sideroflexin 4                                                                               | FXN4          | CTSD/PBS | FXN4                      | not considered/background | -0,315450531 |              | 0 |
| 2305 | Q6P4Q7-2;Q6P4Q7                                                                                                                   | Metal transporter CNNM4                                                                      | CNNM4         | CTSD/PBS | CNNM4                     | not considered/background |              |              | 0 |
| 2306 | Q6P587;Q6P587-2;Q6P587-3                                                                                                          | Acylpyruvase FAHD1, mitochondrial                                                            | FAHD1         | CTSD/PBS | FAHD1                     | not considered/background | 0,323773564  | 0,1938492    | 2 |
| 2307 | Q6P995                                                                                                                            | Protein FAM1718                                                                              | FAM1718       | CTSD/PBS | FAM1718                   | not considered/background |              |              | 0 |
| 2308 | Q6P986;H38UB0;H38M75                                                                                                              | TLD domain-containing protein 1                                                              | TLDIC1        | CTSD/PBS | TLDIC1                    | not considered/background | -0,177620628 | -0,131984509 | 2 |
| 2309 | Q6PCE3                                                                                                                            | Glucose 1,6-bisphosphate synthase                                                            | PGM2L1        | CTSD/PBS | PGM2L1                    | not considered/background | 0,055195654  | 0,116785854  | 2 |
| 2310 | Q6P178                                                                                                                            | Transmembrane protein 65                                                                     | TMEM65        | CTSD/PBS | TMEM65                    | not considered/background | 0,417163907  | 0,359288029  | 2 |
| 2312 | Q6PKG0;Q6PKG0-3;A0A0BAJ210;H0YC                                                                                                   | Myo-related protein 1                                                                        | LARP1         | CTSD/PBS | LARP1                     | not considered/background | -0,290956549 | -0,009060468 | 0 |
| 2313 | Q6PML9                                                                                                                            | Zinc transporter 9                                                                           | SLC30A9       | CTSD/PBS | SLC30A9                   | not considered/background |              |              | 0 |
| 2315 | Q6S2W1;Q6S2W1-2;J3K5G7;J3KRZ6;+ Sterile alpha and TIR motif-containing protein 1                                                  | SARM1                                                                                        | CTSD/PBS      | SARM1    | not considered/background | -0,143181589              |              | 1            |   |
| 2316 | Q6T4P5;Q6T4P5-2;Q6T4P5-3;Q6T4P5-5                                                                                                 | Lipid phosphate phosphatase-related protein type 3                                           | LPPR3         | CTSD/PBS | LPPR3                     | not considered/background | 0,094506329  | -0,023752136 | 2 |
| 2317 | Q6UX07;Q6UX07-2;Q6UX07-3                                                                                                          | Dehydrogenase/reductase SDR family member 13                                                 | DHRS13        | CTSD/PBS | DHRS13                    | not considered/background | 0,160145725  |              | 1 |
| 2319 | Q6UXK5                                                                                                                            | Leucine-rich repeat neuronal protein 1                                                       | LRRN1         | CTSD/PBS | LRRN1                     | not considered/background |              |              | 0 |
| 2320 | Q6VY07;Q6VY07-2;B4DF77;H0YF56;E9                                                                                                  | Phosphofurin acid cluster sorting protein 1                                                  | PACS1         | CTSD/PBS | PACS1                     | not considered/background | -0,057466728 | 0,171011038  | 2 |
| 2321 | Q6Y112;H7C1W1;J3WJG1                                                                                                              | Very-long-chain [3H]-3-hydroxyacyl-CoA dehydratase 2                                         | HACD2         | CTSD/PBS | HACD2                     | not considered/background | 0,01509322   | 0,008917095  | 2 |
| 2322 | Q6YN16;Q6YN16-2                                                                                                                   | Hydroxyester dehydrogenase-like protein 2                                                    | HSOL2         | CTSD/PBS | HSOL2                     | not considered/background | -0,205130861 | -0,213751646 | 2 |
| 2323 | Q6YP21-3;Q6YP21;A0A0A0MRN7;Q6Y1                                                                                                   | Kynurenine-oxoglutarate transaminase 3                                                       | CBSL2         | CTSD/PBS | CBSL2                     | not considered/background | -0,156884445 | -0,219462839 | 2 |
| 2324 | Q6ZMG9;Q6ZMG9-2                                                                                                                   | Ceramide synthase 6                                                                          | CERS6         | CTSD/PBS | CERS6                     | not considered/background | -0,315719849 | -0,064469017 | 2 |
| 2325 | Q6ZM10-2;Q6ZM10;Q6ZM10-4;Q6ZM10- Protein phosphatase 1 regulatory subunit 21                                                      | PPP1R21                                                                                      | CTSD/PBS      | PPP1R21  | not considered/background | -0,251710525              |              | 1            |   |
| 2326 | Q6ZN28                                                                                                                            | Metastasis-associated in colon cancer protein 1                                              | MACC1         | CTSD/PBS | MACC1                     | not considered/background |              | -0,079702372 | 1 |
| 2327 | Q6ZV99                                                                                                                            | G protein-regulated inducer of neurite outgrowth 3                                           | GPRIN3        | CTSD/PBS | GPRIN3                    | not considered/background | 0,001441974  | -0,042924445 | 2 |
| 2328 | Q6ZKX5;Q6ZKX5-2;F8WRY4                                                                                                            | Transmembrane and TPR repeat-containing protein 3                                            | TMTIC3        | CTSD/PBS | TMTIC3                    | not considered/background |              |              | 0 |
| 2329 | Q71J64-3;Q71J64-2;Q71J64;K7EWW                                                                                                    | Transmembrane and ubiquitin-like domain-containing protein 2                                 | TMLB2         | CTSD/PBS | TMLB2                     | not considered/background | 0,008486889  |              | 1 |
| 2330 | Q71U36;Q71U36-2;P0DPH8;P0DPH7                                                                                                     | Tubulin alpha-1A chain; Tubulin alpha-3E chain                                               | TUBA1A;TUBA3E | CTSD/PBS | TUBA1A                    | not considered/background | -0,180969522 | -0,161952159 | 2 |
| 2331 | Q75T13;Q75T13-3;Q75T13-2;Q75T13- GPI inositol-deacylase                                                                           | PGAP1                                                                                        | CTSD/PBS      | PGAP1    | not considered/background | 0,26447638                | 0,402797805  | 2            |   |
| 2332 | Q7KZ47;H7C597                                                                                                                     | Staphylococcal nuclease domain-containing protein 1                                          | SND1          | CTSD/PBS | SND1                      | not considered/background | -0,248039937 | 0,106497992  | 2 |
| 2333 | Q7KZN9;Q7KZN9-2;A0A383IRX1                                                                                                        | Cytochrome c oxidase assembly protein COX15 homolog                                          | COK15         | CTSD/PBS | COK15                     | not considered/background |              |              | 0 |
| 2334 | Q7LO99;Q7LO99-3;Q7LO99-2;Q7LO99- Protein RUFY3                                                                                    | RUFY3                                                                                        | CTSD/PBS      | RUFY3    | not considered/background | -0,081110055              | -0,122473941 | 2            |   |
| 2335 | Q7LO13;Q7LO13-2                                                                                                                   | Synaptic vesicle glycoprotein 2A                                                             | SV2A          | CTSD/PBS | SV2A                      | not considered/background | -0,297058821 | -0,223916751 | 2 |
| 2337 | Q7LOV9;C91066                                                                                                                     | Mitochondrial ribonuclease P protein 1                                                       | TMT10C        | CTSD/PBS | TMT10C                    | not considered/background | 0,083792032  | 0,069739304  | 2 |
| 2339 | Q7L106-2;Q7L106;Q7L106-4;Q7L106 Basic leucine zipper and W2 domain-containing protein 1                                           | BZWI1                                                                                        | CTSD/PBS      | BZWI1    | not considered/background |                           |              | 0            |   |
| 2338 | Q7L266;Q7L266-2;E9PJK6;A0A087WZ Isoaspartyl peptidase/L-asparaginase;isoaspartyl peptidase/L-asparaginase alpha chain;isoaspartyl | ASRG1L                                                                                       | CTSD/PBS      | ASRG1L   | not considered/background | -0,080804862              |              | 1            |   |
| 2339 | Q7L311                                                                                                                            | Armadillo repeat-containing L-linked protein 2                                               | ARMCK2        | CTSD/PBS | ARMCK2                    | not considered/background |              |              | 0 |
| 2340 | Q7L3T8                                                                                                                            | Probable proline-tRNA ligase, mitochondrial                                                  | PARS2         | CTSD/PBS | PARS2                     | not considered/background |              |              | 0 |
| 2341 | Q7L592;C9J527;Q7L592-2;C9J236;C9                                                                                                  | NADH dehydrogenase [ubiquinone] complex 1, assembly factor 7                                 | NDUFAF7       | CTSD/PBS | NDUFAF7                   | not considered/background | 0,19105724   | 0,444556835  | 2 |
| 2342 | Q7L775                                                                                                                            | EPH2A-interacting protein 1                                                                  | EPH2AIP1      | CTSD/PBS | EPH2AIP1                  | not considered/background |              |              | 0 |
| 2343 | Q7L743;Q7L743-3;Q7L743-2                                                                                                          | Serine/threonine-protein kinase TAO1                                                         | TAO1          | CTSD/PBS | TAO1                      | not considered/background |              |              | 0 |
| 2344 | Q7L8C5;H0YD47                                                                                                                     | Synaptotagmin-13                                                                             | SYT13         | CTSD/PBS | SYT13                     | not considered/background | 0,323888827  | 0,169176797  | 2 |
| 2345 | Q7L8L6                                                                                                                            | FAST kinase domain-containing protein 5                                                      | FASTK05       | CTSD/PBS | FASTK05                   | not considered/background |              |              | 0 |
| 2346 | Q7L985                                                                                                                            | Leucine-rich repeat and immunoglobulin-like domain-containing nogo receptor-interacting prot | LINGO2        | CTSD/PBS | LINGO2                    | not considered/background | 0,027577827  |              |   |

|      |                                      |                                                                                                 |                   |          |            |                           |              |              |   |
|------|--------------------------------------|-------------------------------------------------------------------------------------------------|-------------------|----------|------------|---------------------------|--------------|--------------|---|
| 2385 | Q86X76-2;Q86X76-4;Q86X76;Q86X76      | Nitrilase homolog 1                                                                             | NIT1              | CTS0/PBS | NIT1       | not considered/background | 0,400100683  | 0,266142431  | 2 |
| 2386 | Q86Y72;B1AJQ6                        | Syntaxin-12                                                                                     | STX12             | CTS0/PBS | STX12      | not considered/background | 0,170437869  | 0,205180755  | 2 |
| 2387 | Q86Y72-2;Q86Y72-3;Q86Y57-4;Q86Y57-C2 | domain-containing protein 5                                                                     | CZC05             | CTS0/PBS | CZC05      | not considered/background |              |              | 0 |
| 2388 | Q86Y89;MOR2W7;MOR1F7;MOR3G5;E        | Phospholipase D3                                                                                | PLD3              | CTS0/PBS | PLD3       | not considered/background | 0,124592825  | 0,162153614  | 2 |
| 2389 | Q86V38;G3VG05                        | Ankyrin repeat and MYND domain-containing protein 2                                             | ANKMY2            | CTS0/PBS | ANKMY2     | not considered/background | -0,300217413 | -0,163756333 | 2 |
| 2390 | Q86V09                               | NudC domain-containing protein 3                                                                | NUDCD3            | CTS0/PBS | NUDCD3     | not considered/background | 0,094371211  | -0,019630756 | 2 |
| 2391 | Q86VM0;Q86VM0-2                      | Coiled-coil domain-containing protein 50                                                        | CDC050            | CTS0/PBS | CDC050     | not considered/background |              | -0,511468039 | 1 |
| 2393 | Q86VS2;Q86VS2-2                      | Malonyl-CoA-acyl carrier protein transacylase, mitochondrial                                    | MCAT              | CTS0/PBS | MCAT       | not considered/background | 0,319617934  | 0,853292649  | 2 |
| 2395 | Q86W45;Q86W45-2;Q86W45-4;Q86W4       | ATP-dependent (S)-NAD(P)H-hydrate dehydrogenase                                                 | CARKD             | CTS0/PBS | CARKD      | not considered/background | 0,004321606  | 0,184014773  | 2 |
| 2397 | Q86W45-2;Q86W45;Q86W45-3;Q86W45      | Choline transporter-like protein 2                                                              | SLC44A2           | CTS0/PBS | SLC44A2    | not considered/background | -0,230177492 | -0,300650908 | 2 |
| 2398 | Q86W87;C9J54;Q86W87-2;Q86W87         | WD repeat and FYVE domain-containing protein 1                                                  | WDPF1             | CTS0/PBS | WDPF1      | not considered/background | 0,287700866  | -0,198423682 | 2 |
| 2399 | Q86W12;F8W058;Q86W12-3;Q86W12        | Contactin-4                                                                                     | CNTNA             | CTS0/PBS | CNTNA      | not considered/background | -0,3889532   | -0,019346089 | 2 |
| 2400 | Q86X18-2;Q86X18;A0A094C1G5;Q86X      | Dnal homolog subfamily C member 10                                                              | DNAIC10           | CTS0/PBS | DNAIC10    | not considered/background | 0,037874166  | 0,139988657  | 2 |
| 2401 | Q86X12-4;Q86X12;Q86X12-5;Q86X12-2;Q8 | Mitochondrial Rho GTPase 1;Mitochondrial Rho GTPase                                             | RHOT1             | CTS0/PBS | RHOT1      | not considered/background | 0,219586745  | 0,165596204  | 2 |
| 2402 | Q86X16;Q86X16-4;Q86X16-2;Q86X16-3;8  | NAD-dependent protein deacetylase sirutin-2                                                     | SIRT2             | CTS0/PBS | SIRT2      | not considered/background | -0,035623549 | -0,227987459 | 2 |
| 2403 | Q86XM3                               | 39S ribosomal protein L41, mitochondrial                                                        | MRPL41            | CTS0/PBS | MRPL41     | not considered/background | 0,511872807  |              | 1 |
| 2404 | Q86XS6-2;C9J433;B1ALY0;Q86XS6;Q9P    | Paralemmin-2                                                                                    | PALM2;PALM2-AKAP2 | CTS0/PBS | PALM2      | not considered/background | -0,386977623 | -0,192699178 | 2 |
| 2406 | Q86Y55;Q86Y55-2;Q86Y55               | Transmembrane protein 192                                                                       | TMEM192           | CTS0/PBS | TMEM192    | not considered/background |              |              | 0 |
| 2407 | Q86Y85;Q86Y85-2;Q86Y85-2;A0A087X1    | Stromal membrane-associated protein 1                                                           | SMAP1             | CTS0/PBS | SMAP1      | not considered/background | -0,196194348 | -0,385707125 | 2 |
| 2408 | Q86Y87;Q86Y87-3;Q86Y87-2;C9JGPH4;H   | DIS3-like exonuclease 2                                                                         | DIS3L2            | CTS0/PBS | DIS3L2     | not considered/background |              | 0,591875117  | 1 |
| 2409 | Q86Y88                               | ATP-dependent RNA helicase SUPV3L1, mitochondrial                                               | SUPV3L1           | CTS0/PBS | SUPV3L1    | not considered/background |              |              | 0 |
| 2410 | Q86Y16                               | Exocyst complex component 8                                                                     | EXOC8             | CTS0/PBS | EXOC8      | not considered/background |              | -0,308360875 | 1 |
| 2412 | Q86YQ7                               | Threonine synthase-like 1                                                                       | THNSL1            | CTS0/PBS | THNSL1     | not considered/background | 0,341074883  | 0,017548479  | 2 |
| 2413 | Q86NV4;HOY465                        | Leucine-rich repeat LGI family member 2                                                         | LG12              | CTS0/PBS | LG12       | not considered/background |              |              | 0 |
| 2414 | Q86N07                               | Spartin                                                                                         | SPFZ0             | CTS0/PBS | SPFZ0      | not considered/background |              |              | 0 |
| 2415 | Q86N026;H9KV81                       | Tetratricopeptide repeat protein 5                                                              | TRC5              | CTS0/PBS | TRC5       | not considered/background |              |              | 0 |
| 2416 | Q86N111                              | Cell cycle exit and neuronal differentiation protein 1                                          | CEND1             | CTS0/PBS | CEND1      | not considered/background | 0,198368423  | 0,051070285  | 2 |
| 2417 | Q86N118-3;Q86N118-2;Q86N118          | Cytochrome P450 4X1                                                                             | CYP4X1            | CTS0/PBS | CYP4X1     | not considered/background | 0,138945498  |              | 1 |
| 2418 | Q86N122;Q86N122-3;Q86N122-2          | Regulatory-associated protein of mTOR                                                           | RPTOR             | CTS0/PBS | RPTOR      | not considered/background |              |              | 0 |
| 2419 | Q86N126;Q86N126-2;Q86N126-3;A0A0C    | Cell adhesion molecule 3                                                                        | CADM3             | CTS0/PBS | CADM3      | not considered/background | 0,103799746  | 0,050965662  | 2 |
| 2420 | Q86N158;A0A09YXG67                   | Glypican-2;Secreted glypican-2                                                                  | GPC2              | CTS0/PBS | GPC2       | not considered/background | 0,374622202  | 0,488210332  | 2 |
| 2421 | Q86N183;D6RAS6                       | Mimitin, mitochondrial                                                                          | NDUF4F2           | CTS0/PBS | NDUF4F2    | not considered/background | 0,58870864   | 0,265847517  | 2 |
| 2422 | Q86N161;K7ESH4;A0A28R87Y5            | Hexameric protein 1 homolog                                                                     | RHX01             | CTS0/PBS | RHX01      | not considered/background |              |              | 0 |
| 2423 | Q86N164                              | Leucine-rich repeat-containing protein 47                                                       | LRRC47            | CTS0/PBS | LRRC47     | not considered/background | -0,000808136 | -0,005184376 | 2 |
| 2424 | Q86N2F6-4;Q86N2F6-3;Q86N2F6-2;Q86N2  | Armadillo repeat-containing protein 10                                                          | ARMC10            | CTS0/PBS | ARMC10     | not considered/background | 0,291014101  | 0,269164438  | 2 |
| 2426 | Q86N2K0-2;Q86N2K0;Q86N2K0-3;J3I206   | Monoacylglycerol lipase ABHD12                                                                  | ABHD12            | CTS0/PBS | ABHD12     | not considered/background | 0,0739573    | 0,086829096  | 2 |
| 2428 | Q86N335;C9K0F5;C9JFA7;C9JMG6         | Glycerol-3-phosphate dehydrogenase 1-like protein;Glycerol-3-phosphate dehydrogenase [NAD]      | GPDL1             | CTS0/PBS | GPDL1      | not considered/background | -0,068816206 | -0,358621314 | 2 |
| 2429 | Q86N357;F8WCT7                       | Solute carrier family 35 member B6                                                              | SLC35F6           | CTS0/PBS | SLC35F6    | not considered/background | -0,219718602 | -0,214746523 | 2 |
| 2430 | Q86N370;Q86N370-3;Q86N370-4;Q86N37   | Large neutral amino acid transporter small subunit 4                                            | SLC43A2           | CTS0/PBS | SLC43A2    | not considered/background | -0,09175588  | -0,000576963 | 2 |
| 2431 | Q86N316-2;Q86N316-3;Q86N316          | Cell adhesion molecule 2                                                                        | CADM2             | CTS0/PBS | CADM2      | not considered/background | -0,170588794 | -0,195266662 | 2 |
| 2433 | Q86N4H5;H3BUJ3;HOYF69;Q86N4H5-3      | Mitochondrial import receptor subunit TOM5 homolog                                              | TOMM5             | CTS0/PBS | TOMM5      | not considered/background | 0,697593205  | 0,697593205  | 1 |
| 2434 | Q86N411                              | Transmembrane protein 151A                                                                      | TMEM151A          | CTS0/PBS | TMEM151A   | not considered/background |              | 0,269842653  | 1 |
| 2435 | Q86N412;ESRIV0;ESRFT4;ESRJC2;ESRIP1  | Type 2 phosphatidylinositol 4,5-bisphosphate 4-phosphatase                                      | TMEM55A           | CTS0/PBS | TMEM55A    | not considered/background | 0,220577607  | 0,063639883  | 2 |
| 2436 | Q86N4Q0;Q86N4Q0-2                    | Zinc-binding alcohol dehydrogenase domain-containing protein 2                                  | ZADH2             | CTS0/PBS | ZADH2      | not considered/background |              |              | 0 |
| 2437 | Q86N4Q1;Q86N4Q1-2                    | Mitochondrial intermembrane space import and assembly protein 40                                | CHCHD4            | CTS0/PBS | CHCHD4     | not considered/background | 0,401302792  |              | 1 |
| 2438 | Q86N4V1;Q86N4V1-2                    | Membrane magnesium transporter 1                                                                | MMGT1             | CTS0/PBS | MMGT1      | not considered/background | 0,280481274  |              | 1 |
| 2439 | Q86N4V2;HOYH7C5;HOYH7H4              | SNAP                                                                                            | SNAP              | CTS0/PBS | SNAP       | not considered/background |              |              | 0 |
| 2441 | Q86N5H7-6;Q86N5H7-5;Q86N5H7-2;Q86N   | SH2 domain-containing protein 3C                                                                | SH2D3C            | CTS0/PBS | SH2D3C     | not considered/background |              |              | 0 |
| 2442 | Q86N5K1;A0A28RY540;J3L1N9;D6RCF4     | CDGSH iron-sulfur domain-containing protein 2                                                   | CISD2             | CTS0/PBS | CISD2      | not considered/background | 0,176705738  | 0,075900114  | 2 |
| 2443 | Q86N5M1;C9J2Q2;K7CE1C1               | ATP synthase mitochondrial F1 complex assembly factor 2                                         | ATPAF2            | CTS0/PBS | ATPAF2     | not considered/background |              | 0,393728347  | 1 |
| 2444 | Q86N5M9;A0A833IT89                   | Protein jagunal homolog 1                                                                       | JAGN1             | CTS0/PBS | JAGN1      | not considered/background | 0,18027519   | 0,014951393  | 2 |
| 2446 | Q86N608-3;Q86N608-4;Q86N608-2;Q86N   | Inactive dipeptidyl peptidase 10                                                                | DPPI10            | CTS0/PBS | DPPI10     | not considered/background | -0,328398644 | -0,002605443 | 2 |
| 2447 | Q86N6M3                              | Flt storage-inducing transmembrane protein 2                                                    | FTIM2             | CTS0/PBS | FTIM2      | not considered/background |              |              | 0 |
| 2449 | Q86N712;Q86N712-2                    | APC membrane recruitment protein 2                                                              | AMER2             | CTS0/PBS | AMER2      | not considered/background | 0,119422583  | 0,397524116  | 2 |
| 2451 | Q86N8R3;Q86N8R3-3                    | Mitochondrial basic amino acid transporter                                                      | SLC25A29          | CTS0/PBS | SLC25A29   | not considered/background | -0,091832703 |              | 1 |
| 2453 | Q86N8Y2                              | V-type proton ATPase subunit d 2                                                                | ATP6V0D2          | CTS0/PBS | ATP6V0D2   | not considered/background |              | 0,076569346  | 1 |
| 2454 | Q86N8Y3-4;HOYB8U;Q86N8Y3-3;HOY6Y8    | 39S ribosomal protein L43, mitochondrial                                                        | MRPL43            | CTS0/PBS | MRPL43     | not considered/background |              |              | 0 |
| 2455 | Q86N9F7;Q86N9F7-2;J3QCQ7;Q86N9F7-3   | Glycerophosphidester phosphodiesterase domain-containing protein 1                              | GDPD1             | CTS0/PBS | GDPD1      | not considered/background | -0,057121465 | -0,405338916 | 2 |
| 2457 | Q86NAT1                              | Protein O-linked-mannose beta-1,4-N-acetylglucosaminyltransferase 2                             | POMGN2T           | CTS0/PBS | POMGN2T    | not considered/background | -0,323949283 |              | 1 |
| 2458 | Q86NB65;Q86NB65-2;88Z2W5             | Late secretory pathway protein AVL9 homolog                                                     | AVL9              | CTS0/PBS | AVL9       | not considered/background |              |              | 0 |
| 2459 | Q86NB66;Q86NB66-2;Q86NB66-2;A0A140T  | Xylosidase/xylosyltransferase 1                                                                 | XKYL1             | CTS0/PBS | XKYL1      | not considered/background | 0,312665174  | 0,350927234  | 2 |
| 2460 | Q86NB14-2;Q86NB14                    | Golgi membrane protein 1                                                                        | GOLM1             | CTS0/PBS | GOLM1      | not considered/background |              |              | 0 |
| 2461 | Q86NB5;MOQK7-2                       | Procollagen galactosyltransferase 1                                                             | COLGALT1          | CTS0/PBS | COLGALT1   | not considered/background | 0,255077682  | 0,122632667  | 2 |
| 2462 | Q86NB8M;E7EV25;D6R9J0                | Prenylcysteine oxidase-like 1                                                                   | PCYOX1L           | CTS0/PBS | PCYOX1L    | not considered/background |              |              | 0 |
| 2463 | Q86NB8N7;G8J1A1;Q86NB8N7-2;K7EMY5    | Retinol dehydrogenase 13                                                                        | RHD13             | CTS0/PBS | RHD13      | not considered/background | 0,236094579  | 0,142162287  | 2 |
| 2464 | Q86NB59-2;Q86NB59                    | Thioredoxin domain-containing protein 5                                                         | TXNDC5            | CTS0/PBS | TXNDC5     | not considered/background | 0,241718175  | 0,119636572  | 2 |
| 2465 | Q86NBUS5;Q86NBUS-2                   | ATPase family AAA domain-containing protein 1                                                   | ATAD1             | CTS0/PBS | ATAD1      | not considered/background | 0,291752588  | 0,191573759  | 2 |
| 2466 | Q86NBX0                              | Saccharinase-like dehydrogenase-like oxidoreductase                                             | SCCPDH            | CTS0/PBS | SCCPDH     | not considered/background | 0,326652381  | 0,195762682  | 2 |
| 2467 | Q86NC44;F8W6E8;F8WAL5;H7C3D5         | Protein FAM134A                                                                                 | FAM134A           | CTS0/PBS | FAM134A    | not considered/background | -0,022901327 | -0,140516919 | 2 |
| 2468 | Q86NC51-4;Q86NC51-3;Q86NC51-2;Q86NC  | Plasminogen activator inhibitor 1-like binding protein                                          | SERBP1            | CTS0/PBS | SERBP1     | not considered/background | 0,061015775  | -0,418135964 | 2 |
| 2469 | Q86NC56;D6R9S8;D6R8V0;Q86NC56-2;JEM  | LEM domain-containing protein 2                                                                 | LEMD2             | CTS0/PBS | LEMD2      | not considered/background |              |              | 0 |
| 2470 | Q86NCB2;Q86NCB2-2;B4DM24;C9J9E2;C    | CaM kinase-like vesicle-associated protein                                                      | CAMKV             | CTS0/PBS | CAMKV      | not considered/background | 0,181929438  | 0,20240591   | 2 |
| 2471 | Q86NCB2-3;E7ETR1                     | CaM kinase-like vesicle-associated protein                                                      | CAMKV             | CTS0/PBS | CAMKV      | not considered/background | 0,447103068  | 0,148400687  | 2 |
| 2472 | Q86NCW5-2;Q86NCW5;Q86NCW5-2;Q86NC    | NAD(P)H-hydrate epimerase                                                                       | AP0A18P           | CTS0/PBS | AP0A18P    | not considered/background | -0,041283508 | 0,145954653  | 2 |
| 2475 | Q86ND11-3;Q86ND11-2;Q86ND11-3;Q86ND  | EH domain-binding protein 1                                                                     | ENBP1             | CTS0/PBS | ENBP1      | not considered/background |              |              | 0 |
| 2476 | Q86NE6-3;Q86NE65;S4R468;Q86NE6-2     | Calcium uniporter protein, mitochondrial                                                        | MCU               | CTS0/PBS | MCU        | not considered/background | 0,176960992  | -0,798423845 | 1 |
| 2477 | Q86NF37;A0A0G2JQ62;A0A0G2JRI7        | Lysophosphatidylcholine acyltransferase 1                                                       | LPCAT1            | CTS0/PBS | LPCAT1     | not considered/background | 0,170184158  | -0,104068226 | 2 |
| 2478 | Q86NF8                               | Delta and Notch-like epidermal growth factor-related receptor                                   | DNER              | CTS0/PBS | DNER       | not considered/background | 0,243669081  |              | 1 |
| 2479 | Q86NFV4;Q86NFV4-4;Q86NFV4-6          | Alpha/beta hydrolase domain-containing protein 11                                               | ABHD11            | CTS0/PBS | ABHD11     | not considered/background |              | 0,494027794  | 1 |
| 2480 | Q86NFW8;Q86NFW8-2                    | N-acylneuraminatyl cytidyltransferase                                                           | CNMG              | CTS0/PBS | CNMG       | not considered/background |              |              | 0 |
| 2481 | Q86NF24;J3L498                       | Neuroigin-2                                                                                     | NLGAS             | CTS0/PBS | NLGAS      | not considered/background | -0,185851577 | -0,223546116 | 2 |
| 2482 | Q86NFZ8                              | Cell adhesion molecule 4                                                                        | CADM4             | CTS0/PBS | CADM4      | not considered/background | 0,013927066  | -0,188021051 | 2 |
| 2484 | R4GAM1;Q86NHP6;R4GNG6;Q86NHP6-2      | Motile sperm domain-containing protein 2                                                        | MOSPD2            | CTS0/PBS | MOSPD2     | not considered/background |              |              | 0 |
| 2485 | Q86NHP8;Q86NHP8-2                    | Putative phospholipase B-like 2;Putative phospholipase B-like 2 32 kDa form;Putative phospholip | PLBD2             | CTS0/PBS | PLBD2      | not considered/background | 0,058524312  | -0,095451881 | 2 |
| 2486 | Q86TAA5;D6RGI6                       | GrpE protein homolog 2, mitochondrial                                                           | GRPEL2            | CTS0/PBS | GRPEL2     | not considered/background |              |              | 0 |
| 2487 | Q86TAC9;Q86TAC9-2;H3BP89;H3BU33;H    | Secretory carrier-associated membrane protein 5                                                 | SCAMP5            | CTS0/PBS | SCAMP5     | not considered/background | 0,074779426  | -0,192699178 | 2 |
| 2489 | Q86TAE8                              | Growth arrest and DNA damage inducible proteins-interacting protein 1                           | GADD45GIP1        | CTS0/PBS | GADD45GIP1 | not considered/background |              |              | 0 |
| 2490 | Q86TAF3;Q86TAF3-4;Q86TAF3-3;F8W9K4;W | WD repeat-containing protein 48                                                                 | WDR48             | CTS0/PBS | WDR48      | not considered/background |              |              | 0 |
| 2492 | Q86TAF5;Q86TAF5-2;A0A0D95F9;J3L4U1   | Nuclear protein localization protein 4 homolog                                                  | NPLC04            | CTS0/PBS | NPLC04     | not considered/background |              |              | 0 |
| 2493 | Q86TB37;F8W0X1;Q86TB37-2;F8W0X1      | Iron-sulfur protein NUBP1                                                                       | NUBP1             | CTS0/PBS | NUBP1      | not considered/background | 0,602551897  | -0,040962548 | 2 |
| 2494 | Q86TB86;F5GK05;H3BU11                | T-cell immunomodulatory protein                                                                 | ITG1              | CTS0/PBS | ITG1       | not considered/background | 0,004962548  | -0,150949541 | 2 |
| 2495 | Q86TB86                              | Probable cationic amino acid transporter                                                        | SLC7A14           | CTS0/PBS | SLC7A14    | not considered/background | -0,019901561 | -0,330214177 | 2 |
| 2496 | Q86TB14;A0A01YPPY5                   | Lipid phosphate phosphatase-related protein type 1                                              | LPPI1             | CTS0/PBS | LPPI1      | not considered/background | 0,057692867  | 0,096869153  | 2 |
| 2498 | Q86TBQ9                              | Protein kish-A                                                                                  | TMEM167A          | CTS0/PBS | TMEM167A   | not considered/background |              |              | 0 |
| 2499 | Q86TC12;Q86TC12-2;G3V2G6;G3V234;H    | Retinol dehydrogenase 11                                                                        | RHDH11            | CTS0/PBS | RHDH11     | not considered/background | -0,101520744 | 0,034736565  | 2 |
| 2500 | Q86TC26;Q86TC26-2;Q86TC26-3          | Transmembrane protein 163                                                                       | TMEM163           | CTS0/PBS | TMEM163    | not considered/background | -0,014528715 | 0,026469594  | 2 |
| 2502 | Q86TC12                              | Deolchyl-diphosphogalactosylcharride-protein glycosyltransferase subunit ST3B8                  | ST3B8             | CTS0/PBS | ST3B8      | not considered/background | 0,231555229  | 0,273848884  | 2 |
| 2503 | Q86TC58;H7C3C5;H7BXF6                | Polyribonucleotide nucleotidyltransferase 1, mitochondrial                                      | PNPMT1            | CTS0/PBS | PNPMT1     | not considered/background |              | 0,081537435  | 1 |
| 2504 | Q86TEA8;A0A28R8YCT7;A0A28R8YX62;A0   | D-tyrosyl-tRNA(Tyr) deacylase 1;D-tyrosyl-tRNA(Tyr) deacylase                                   | TD1               | CTS0/PBS | TD1        | not considered/background | 0,229957009  | 0,028116217  | 2 |
| 2506 | Q86TF42                              | Ubiquitin-associated and SH3 domain-containing protein B                                        | UBASH3B           | CTS0/PBS | UBASH3B    | not considered/background |              |              | 0 |
| 2507 | Q86WU76;Q86WU76-2;A0A087WUD07        | Sec1 family domain-containing protein 2                                                         | SCFD2             | CTS0/PBS | SCFD2      | not considered/background |              |              | 0 |
| 2508 | Q86WUD1;A0A3831T11;Q86WUD1-2;E9F     | Ras-related protein Rab-28                                                                      | RAB28             | CTS0/PBS | RAB28      | not considered/background | 0,247198389  | -0,063502942 | 2 |
| 2509 | Q86WUK0;Q86WUK0-2;Q86WUK0-3;E9P      | Phosphatidylglycerophosphate and protein-tyrosine phosphatase 1                                 | PITPMT1           | CTS0/PBS | PITPMT1    | not considered/background | 0,319271091  |              |   |

|      |                                     |                                                                                              |           |          |          |                           |              |              |   |
|------|-------------------------------------|----------------------------------------------------------------------------------------------|-----------|----------|----------|---------------------------|--------------|--------------|---|
| 2553 | Q92854;Q92854-2;E9PFD9              | Semaphorin-4D                                                                                | SEMA4D    | CTSD/PBS | SEMA4D   | not considered/background | 0,0824301    | 0,189581575  | 2 |
| 2554 | Q92859-3;Q92859-2;Q92859-4;Q928     | Neogenin                                                                                     | NEO1      | CTSD/PBS | NEO1     | not considered/background | -0,164189083 | -0,037593076 | 2 |
| 2555 | Q92871;H3BP84;H3BV55;J15305         | Phosphomannomutase 1                                                                         | PM1M1     | CTSD/PBS | PM1M1    | not considered/background |              |              | 0 |
| 2556 | Q92890;Q92890-1;C9IAP9;Q92890-3     | Ubiquitin chain degradation protein 1 homolog                                                | UBD1L     | CTSD/PBS | UBD1L    | not considered/background | -0,229162499 | -0,010779839 | 2 |
| 2557 | Q92896;Q92896-3;Q92896-2;H3B8M      | Golgi apparatus protein 1                                                                    | GLG1      | CTSD/PBS | GLG1     | not considered/background | -0,155935785 | -0,132642643 | 2 |
| 2559 | Q92905;ESRHH5;ESRHF2                | COP9 signalosome complex subunit 5                                                           | COP55     | CTSD/PBS | COP55    | not considered/background | 0,082157559  | -0,03243657  | 2 |
| 2560 | Q92930;HOYN69;HOYMN7                | Ras-related protein Rab-8B                                                                   | RAB88     | CTSD/PBS | RAB88    | not considered/background | 0,155749233  | 0,149104587  | 2 |
| 2561 | Q92973-2;Q92973-3;Q92973-3;E7EW37   | Transpentin-1                                                                                | TNP01     | CTSD/PBS | TNP01    | not considered/background |              | 0,096792011  | 1 |
| 2562 | Q93008-3;Q93008;000507-2            | Probable ubiquitin carboxyl-terminal hydrolase FAF-X                                         | USP9X     | CTSD/PBS | USP9X    | not considered/background |              | 0,299471503  | 2 |
| 2563 | Q93034;HOYCA0                       | Cullin-5                                                                                     | CUL5      | CTSD/PBS | CUL5     | not considered/background | -0,166664591 | -0,106214296 | 2 |
| 2564 | Q93050;Q93050-1;Q93050-3;R72ZAO     | Proton-sodium ATPase 11b KDa subunit a isoform 1;V-type proton ATPase subunit a              | ATP6V0A1  | CTSD/PBS | ATP6V0A1 | not considered/background | -0,161685539 | -0,026587622 | 2 |
| 2565 | Q9692-2;Q9692-7;K7ELJ4;C9JWM2;Q     | Secretory carrier-associated membrane protein 4                                              | SCAMP4    | CTSD/PBS | SCAMP4   | not considered/background |              | -0,062950609 | 1 |
| 2566 | Q96966                              | Riboflavin kinase                                                                            | RFK       | CTSD/PBS | RFK      | not considered/background |              |              | 0 |
| 2567 | Q969H8;MOQXF7;MOQYNO                | Myeloid-derived growth factor                                                                | MYDGF     | CTSD/PBS | MYDGF    | not considered/background | 0,359858472  | 0,064796754  | 2 |
| 2569 | Q969M1-2;Q969M1                     | Mitochondrial import receptor subunit TOM40B                                                 | TOMM40L   | CTSD/PBS | TOMM40L  | not considered/background |              |              | 0 |
| 2570 | Q969M3;Q969M3-3;ESRGR9;ESRHH4;P     | Protein YIPF5; Protein YIPF                                                                  | YIPF5     | CTSD/PBS | YIPF5    | not considered/background |              |              | 0 |
| 2571 | Q969P0-3;Q969P0-3;Q969P0-2;Q969P0-2 | Immunoglobulin superfamily member 8                                                          | IGSF8     | CTSD/PBS | IGSF8    | not considered/background | 0,038576651  | 0,11425385   | 2 |
| 2572 | Q969Q5;F9WH5;D6RFW2                 | Ras-related protein Rab-24                                                                   | RAB24     | CTSD/PBS | RAB24    | not considered/background | -0,154971685 | 0,169605251  | 2 |
| 2573 | Q969V3-2;Q969V3-4;K7EMW4;K7ELZ9     | Niclin                                                                                       | NCLN      | CTSD/PBS | NCLN     | not considered/background | -0,040541412 | -0,159758338 | 2 |
| 2575 | Q969X5-2;Q969X5;F2Z3Q5;F2Z2UO;Q     | Endoplasmic reticulum-Golgi intermediate compartment protein 1                               | ERGIC1    | CTSD/PBS | ERGIC1   | not considered/background | -0,089651085 | 0,210512783  | 2 |
| 2576 | Q969Z0;Q969Z0-2;H7C4R5;C9JZN7;C9    | Protein TBRG4                                                                                | TBRG4     | CTSD/PBS | TBRG4    | not considered/background |              | 0,284668885  | 1 |
| 2577 | Q96A33;Q96A33-2;A0A087WYW6          | Coiled-coil domain-containing protein 47                                                     | CDC47     | CTSD/PBS | CDC47    | not considered/background |              |              | 0 |
| 2578 | Q96A35;X6RJ73                       | 39S ribosomal protein L24, mitochondrial                                                     | MRPL24    | CTSD/PBS | MRPL24   | not considered/background |              | 0,44691479   | 1 |
| 2579 | Q96A49                              | Synapse-associated protein 1                                                                 | SVAP1     | CTSD/PBS | SVAP1    | not considered/background |              |              | 0 |
| 2580 | Q96A65-2;Q96A65                     | Exocyst complex component 4                                                                  | EXO4      | CTSD/PBS | EXO4     | not considered/background |              | -0,058662839 | 2 |
| 2582 | Q96A83;Q96A83-2;Q96A83-3;K7ENV7     | Isochorismatase domain-containing protein 2, mitochondrial                                   | ISO2      | CTSD/PBS | ISO2     | not considered/background | 0,108089049  | 0,696961609  | 2 |
| 2583 | Q96AG3;Q96AG3-3;E7VW2;Q96AG3-2      | Solute carrier family 25 member 46                                                           | SLC25A46  | CTSD/PBS | SLC25A46 | not considered/background | 0,050650039  | 0,175512752  | 2 |
| 2584 | Q96AG4;J3L223                       | Leucine-rich repeat-containing protein 59                                                    | LRRCS9    | CTSD/PBS | LRRCS9   | not considered/background | 0,153416242  | 0,269877442  | 2 |
| 2585 | Q96AQ6-3;Q96AQ6-2;Q96AQ6;Q5T17      | Pre-B-cell leukemia transcription factor-interacting protein 1                               | PBXIP1    | CTSD/PBS | PBXIP1   | not considered/background |              |              | 0 |
| 2587 | Q96AY3;K7EM43;K7ELI6;K7ESG6;Q96     | Peptidyl-prolyl cis-trans isomerase FKBP10                                                   | FKBP10    | CTSD/PBS | FKBP10   | not considered/background | -0,578887138 |              | 2 |
| 2588 | Q96B13;Q96B13-2;Q96B13-3            | Axin interactor, dorsalization-associated protein                                            | AIDA      | CTSD/PBS | AIDA     | not considered/background |              |              | 0 |
| 2589 | Q96BM9;A0A087XZ12                   | ARL8                                                                                         | ARL8A     | CTSD/PBS | ARL8A    | not considered/background | -0,10648246  |              | 2 |
| 2590 | Q96B85                              | Coated-coil coxide assembly factor 7                                                         | COA7      | CTSD/PBS | COA7     | not considered/background |              |              | 0 |
| 2591 | Q96BW9-2;Q96BW9-2;Q96BW9;A0A0       | Phosphatidate cytidylyltransferase, mitochondrial                                            | TAMM41    | CTSD/PBS | TAMM41   | not considered/background | 0,298658391  | 0,352676279  | 2 |
| 2592 | Q96C36;A0A087WTV6;A0A087WZ89;P      | Pyrolysine-5-carboxylate reductase 2;Pyrolysine-5-carboxylate reductase                      | PYCR2     | CTSD/PBS | PYCR2    | not considered/background |              | 0,45753392   | 1 |
| 2594 | Q96CN4-2;Q96CN4;MOR1Y1              | EVIS-like protein                                                                            | EVISL     | CTSD/PBS | EVISL    | not considered/background | -0,511484991 |              | 2 |
| 2595 | Q96CN7;D6RGE2                       | Isochorismatase domain-containing protein 1                                                  | ISOC1     | CTSD/PBS | ISOC1    | not considered/background | -0,231498053 | -0,127999473 | 2 |
| 2596 | Q96CS3                              | FAS-associated factor 2                                                                      | FAF2      | CTSD/PBS | FAF2     | not considered/background | 0,203263813  | -0,053945425 | 2 |
| 2597 | Q96C77                              | Coiled-coil domain-containing protein 124                                                    | CDC124    | CTSD/PBS | CDC124   | not considered/background | -0,13599643  |              | 2 |
| 2598 | Q96C09-2;Q96C09-3;Q96C09-3          | FAD-dependent oxidoreductase domain-containing protein 1                                     | FOXRED1   | CTSD/PBS | FOXRED1  | not considered/background |              | 0,301906012  | 1 |
| 2599 | Q96C09-2;Q96C09-3                   | Ntrin-G2                                                                                     | NTNG2     | CTSD/PBS | NTNG2    | not considered/background | -0,03082556  |              | 2 |
| 2600 | Q96CX2                              | BTB/POZ domain-containing protein KCTD12                                                     | KCTD12    | CTSD/PBS | KCTD12   | not considered/background |              | -0,851679091 | 1 |
| 2601 | Q96D05-2;Q96D05;Q5VWH9              | Uncharacterized protein C10orf35                                                             | C10orf35  | CTSD/PBS | C10orf35 | not considered/background | 0,372172052  | 0,128787176  | 2 |
| 2602 | Q96DA2                              | Ras-related protein Rab-39B                                                                  | RAB39B    | CTSD/PBS | RAB39B   | Transport machinery       | 0,185612862  | 0,043036371  | 2 |
| 2603 | Q96DA6;Q96DA6-2;G5E9V2;F2Z3A7;A     | Mitochondrial import inner membrane translocase subunit TIM14                                | DNAJC19   | CTSD/PBS | DNAJC19  | not considered/background |              | 0,529822389  | 1 |
| 2604 | Q96DB5-2;Q96DB5;HOVC27;HOYCF7       | Regulator of microtubule dynamics protein 1                                                  | RMDN1     | CTSD/PBS | RMDN1    | not considered/background |              |              | 0 |
| 2605 | Q96DE4                              | Protein shisa4                                                                               | SHISA4    | CTSD/PBS | SHISA4   | not considered/background |              |              | 0 |
| 2606 | Q96DE0-3;Q96DE0;Q96DE0-2;Q96DE0     | U8 snRNA-decapping enzyme                                                                    | NUDT16    | CTSD/PBS | NUDT16   | not considered/background |              |              | 0 |
| 2607 | Q96DV4;Q96DV4-2                     | 39S ribosomal protein L38, mitochondrial                                                     | MRPL38    | CTSD/PBS | MRPL38   | not considered/background | 0,231923873  | 0,092940138  | 2 |
| 2608 | Q96DZ1;Q96DZ1-3;Q96DZ1-2            | Endoplasmic reticulum lectin 1                                                               | ERLEC1    | CTSD/PBS | ERLEC1   | not considered/background | 0,381061287  | -0,029276182 | 2 |
| 2609 | Q96DZ5;K7ESF3                       | CAP-Gly domain-containing linker protein 3                                                   | CLIP3     | CTSD/PBS | CLIP3    | not considered/background |              | 0,198891021  | 1 |
| 2610 | Q96E11-8;Q96E11-3;Q96E11;Q96E11     | Ribosome-recycling factor, mitochondrial                                                     | MRRF      | CTSD/PBS | MRRF     | not considered/background |              |              | 0 |
| 2611 | Q96E17                              | Ras-related protein Rab-3C                                                                   | RAB3C     | CTSD/PBS | RAB3C    | not considered/background | -0,034603564 | -0,005759269 | 2 |
| 2613 | Q96E12;F8VRS                        | MRP2                                                                                         | MRP24     | CTSD/PBS | MRP24    | not considered/background |              |              | 0 |
| 2615 | Q96E89;C9J8W8;Q96E89-2;C9JP28       | Coiled-coil domain-containing protein 51                                                     | CDC5C1    | CTSD/PBS | CDC5C1   | not considered/background | 0,64221512   | 0,131392245  | 2 |
| 2616 | Q96EY1-2;Q96EY1;Q96EY1-3;J3L1T6     | Dnal homolog subfamily A member 3, mitochondrial                                             | DNAJA3    | CTSD/PBS | DNAJA3   | not considered/background | 1,200127654  | 0,470988689  | 2 |
| 2617 | Q96EY7;Q96EY7-2;B8Z2Q4;F8WEV6       | Pentatricopeptide repeat domain-containing protein 3, mitochondrial                          | PTCD3     | CTSD/PBS | PTCD3    | not considered/background | -0,04996466  | 0,352657857  | 2 |
| 2618 | Q96EY8;S4R3P5;F5H079;A0A087X114     | Cbl[lyrinic acid, a,c-diamide adenylyltransferase, mitochondrial                             | MMAB      | CTSD/PBS | MMAB     | not considered/background | 0,247441471  | 0,24812133   | 2 |
| 2619 | Q96F85;Q96F85-2;B8Z288              | CBI cannabinoid receptor-interacting protein-like                                            | CNR1P1    | CTSD/PBS | CNR1P1   | not considered/background | -0,263680878 | -0,003314389 | 2 |
| 2620 | Q96F77;Q96F77-2;ESRHH5;Q92561;P     | Phytanoyl-CoA hydroxylase-interacting protein-like                                           | PHYHIP1   | CTSD/PBS | PHYHIP1  | not considered/background | -0,096475528 | -0,308593869 | 2 |
| 2621 | Q96F75;Q96F85;HOYHM3;H3BNA48        | Leucine-rich repeat and immunoglobulin-like domain-containing nogo receptor-interacting prot | LINGO1    | CTSD/PBS | LINGO1   | not considered/background | -0,114425636 | 0,161943748  | 2 |
| 2622 | Q96FJ2                              | Oxygen light chain 2, cytoplasmic                                                            | DYWL12    | CTSD/PBS | DYWL12   | not considered/background |              |              | 0 |
| 2623 | Q96FNA;Q96FNA-2;H3BUC6;H3BQO3       | Copine-2                                                                                     | CPNE2     | CTSD/PBS | CPNE2    | not considered/background | 0,065434446  | -0,110897723 | 2 |
| 2624 | Q96FZ7;J3L4G8;J3L4A1;J3L3E4         | Charged multivesicular body protein 6                                                        | CHMP6     | CTSD/PBS | CHMP6    | not considered/background | 0,019203734  | -0,094911647 | 2 |
| 2625 | Q96G03;E9PD07;E7ENC8                | Phosphoglucosmutase-2                                                                        | PGM2      | CTSD/PBS | PGM2     | not considered/background |              |              | 0 |
| 2626 | Q96G61;Q8NFP7;Q8NZD9;Q8NZD9-2;A     | Diphosphoinositol polyphosphate phosphohydrolase 3-beta;Diphosphoinositol polyphosphate      | NUDT11    | CTSD/PBS | NUDT11   | not considered/background |              | -0,337768171 | 1 |
| 2627 | Q96GA7;F8VY23;HOYD13;F8VZ97;HOY     | Serine dehydratase-like                                                                      | SDSL      | CTSD/PBS | SDSL     | not considered/background | 0,020626651  | -0,295605489 | 2 |
| 2628 | Q96G00;B1ADH5;Q8ZT62-3;Q8ZT62       | Pyridoxal phosphate phosphatase                                                              | PDXP      | CTSD/PBS | PDXP     | not considered/background | 0,001009533  | 0,071451542  | 2 |
| 2629 | Q96G47;Q96P23;C9JGIM0               | Fungicide resistance domain-containing protein 2A;Fumarylacetoacetate hydrolase              | FAHD2B    | CTSD/PBS | FAHD2B   | not considered/background | 0,541118304  | 0,071451542  | 2 |
| 2631 | Q96G54                              | Uncharacterized protein C17orf59                                                             | C17orf59  | CTSD/PBS | C17orf59 | not considered/background | 0,369047643  | 0,289933077  | 2 |
| 2632 | Q96GW9                              | Methionine-tRNA ligase, mitochondrial                                                        | MARS2     | CTSD/PBS | MARS2    | not considered/background | 0,341442441  | 0,193189283  | 2 |
| 2634 | Q96GY0;HOYAP0                       | Zinc finger C2HC domain-containing protein 1A                                                | ZC2HC1A   | CTSD/PBS | ZC2HC1A  | not considered/background | 0,019061365  | -0,197362184 | 2 |
| 2635 | Q96H20-2;Q96H20;HOY855;D6RBH1;D     | Vacuolar-sorting protein SNF8                                                                | SNF8      | CTSD/PBS | SNF8     | not considered/background |              |              | 0 |
| 2636 | Q96HD1-1;Q96HD1-2;A0A4669K8B3;A0A   | Cysteine-rich with EGF-like protein domain 1                                                 | CRELD1    | CTSD/PBS | CRELD1   | not considered/background | 0,327457434  |              | 2 |
| 2637 | Q96HE7;G3V6E8;G3V5H63;G3V2H0;G3     | ERK01-like protein alpha                                                                     | ERK01     | CTSD/PBS | ERK01    | not considered/background | 0,293257256  | 0,280229523  | 2 |
| 2638 | Q96HA2-2;Q96HA2;Q96HA2-2;Q96HA2     | Putative aspartylglycyl hydrolase 3;Adenosylhomocysteinase                                   | AHCY12    | CTSD/PBS | AHCY12   | not considered/background |              |              | 0 |
| 2640 | Q96HS1;Q96HS1-2;F5SGX4              | Serine/threonine protein phosphatase PGAM5, mitochondrial                                    | PGAM5     | CTSD/PBS | PGAM5    | not considered/background | 0,410850148  |              | 1 |
| 2641 | Q96HUS;A0A180GVK3;A0A180GW49        | GTP-binding protein Di-Ras2                                                                  | DIRAS2    | CTSD/PBS | DIRAS2   | not considered/background |              | 0,265882209  | 1 |
| 2642 | Q96HY7;C9JWN1;H7C1J3                | Probable 2-oxoglutarate dehydrogenase E1 component DHKTD1, mitochondrial                     | DHTKD1    | CTSD/PBS | DHTKD1   | not considered/background |              |              | 0 |
| 2643 | Q96IS9;HOYEL9;E9PRK2;Q96IS9-2;HO    | Probable asparagine-tRNA ligase, mitochondrial                                               | NARS2     | CTSD/PBS | NARS2    | not considered/background | 0,253747285  | 0,012519046  | 2 |
| 2644 | Q96TA2-3;Q96TA2-2;Q96T63;Q96TA2     | ATP-dependent zinc metalloprotease YME1L1                                                    | YME1L1    | CTSD/PBS | YME1L1   | not considered/background |              | 0,536009064  | 1 |
| 2645 | Q96K5                               | Up-regulated during skeletal muscle growth protein 5                                         | USMG5     | CTSD/PBS | USMG5    | not considered/background | 0,107286135  | 0,030000438  | 2 |
| 2646 | Q96K55-3;Q96K55;Q96K55-4;J3LQ86     | CDK5 regulatory subunit-associated protein 3                                                 | CDK5RAP3  | CTSD/PBS | CDK5RAP3 | not considered/background | 0,321597465  | 0,270869278  | 2 |
| 2647 | Q96KIE9;Q96IE9-3;Q96IE9-2           | Microtubule-associated protein 3                                                             | MAP6      | CTSD/PBS | MAP6     | not considered/background | -0,10572159  | -0,05630606  | 2 |
| 2648 | Q96KH7                              | Deubiquitinating protein VCIPI35                                                             | VCIPI1    | CTSD/PBS | VCIPI1   | not considered/background |              |              | 0 |
| 2649 | Q96J17;Q96J17-2;B4DI03              | Protein disulfide-isomerase TMX3                                                             | TMX3      | CTSD/PBS | TMX3     | not considered/background | 0,014926544  |              | 1 |
| 2650 | Q96JQ0                              | Protocadherin-16                                                                             | DCHS1     | CTSD/PBS | DCHS1    | not considered/background |              |              | 0 |
| 2651 | Q96K17;Q96K17-2;E9PL10;Q96K17-3     | Transcription factor BTf3 homolog 4;Transcription factor BTf3                                | BTf3L4    | CTSD/PBS | BTf3L4   | not considered/background | -0,058833578 | -0,213876043 | 2 |
| 2653 | Q96KP1                              | Exocyst complex component 2                                                                  | EXO2      | CTSD/PBS | EXO2     | not considered/background | -0,357252226 |              | 2 |
| 2654 | Q96KP4;Q96KP4-2;J3QKZ7;J3QKZ0       | Cytosolic non-specific dipeptidase                                                           | CNDP2     | CTSD/PBS | CNDP2    | not considered/background | -0,175142554 | -0,423524383 | 2 |
| 2655 | Q96L32-3;Q96L32;A0A28R1871;H7C5     | Sorting nexin-27                                                                             | SNX27     | CTSD/PBS | SNX27    | not considered/background |              |              | 0 |
| 2656 | Q96L63;H3BU79;H3BUH6;H3B8F6;Q9      | Uncharacterized protein C16orf45                                                             | CL16orf45 | CTSD/PBS | C16orf45 | not considered/background | 0,231801023  | -0,097745622 | 2 |
| 2660 | Q96M20;Q96M20-4;HOY6A7;HOUIB3;G     | Angiotensin-induced differentiation-associated protein 1-like 1                              | GDAP1L1   | CTSD/PBS | GDAP1L1  | not considered/background | 0,399444565  | 0,205080968  | 2 |
| 2661 | Q96N03-2;Q96N03                     | V-set and transmembrane domain-containing protein 2-like protein                             | VSTM2L    | CTSD/PBS | VSTM2L   | not considered/background | 0,783414745  |              | 1 |
| 2662 | Q96N66;Q96N66-2;Q96N66-3;H7C2N      | Cysophospholipid acyltransferase 7                                                           | MBOAT7    | CTSD/PBS | MBOAT7   | not considered/background | -0,105830261 | 0,188167313  | 2 |
| 2663 | Q96N6;G3V4N1;G3V364                 | Leucine-rich repeat and fibronectin type-III domain-containing protein 5                     | LRFN5     | CTSD/PBS | LRFN5    | not considered/background | -0,257409837 | 0,273068718  | 2 |
| 2666 | Q96P47;Q96P47-2;Q96P47-4;Q96P47     | ArfGAP1 with GTPase, ANK repeat and PH domain-containing protein 3                           | AGAP3     | CTSD/PBS | AGAP3    | not considered/background | -0,131945441 |              | 2 |
| 2667 | Q96P70                              | Importin-9                                                                                   | IPPO9     | CTSD/PBS | IPPO9    | not considered/background |              |              | 0 |
| 2668 | Q96PE2-3;Q96PE3-3;Q96PE3-3;Q96PE    | Type I inositol 3,4-bisphosphate 4-phosphatase                                               | INPP4A    | CTSD/PBS | INPP4A   | not considered/background |              | 0,576819869  | 1 |
| 2669 | Q96Q11-2;Q96Q11-1;A0A494C0A0;F8W    | CA tRNA nucleotidyltransferase 1, mitochondrial                                              | TRNT1     | CTSD/PBS | TRNT1    | not considered/background | 0,147957881  |              | 1 |
| 2670 | Q96QE2;E9PE47                       | Proton myo-inositol cotransporter                                                            | SLC2A13   | CTSD/PBS | SLC2A13  | not considered/background | 0,100304906  | -0,290070047 | 2 |
| 2671 | Q96QG7-2;Q96QG7                     | Myotubularin-related protein 9                                                               | MTMR9     | CTSD/PBS | MTMR9    | not considered/background |              |              | 0 |
| 2672 | Q96QK1;J3L450;A0A1W2P2P10;A0A3B     | Vacuolar protein sorting-associated protein 35                                               | VP535     | CTSD/PBS | VP535    | not considered/background | -0,225936182 | 0,013633348  | 2 |
| 2674 | Q96R07-2;Q96R07                     | Pannexin-1                                                                                   | PANX1     | CTSD/PBS | PANX1    | not considered/background | -0,305520921 | 0,107352518  | 2 |
| 2677 | Q96R99;Q96R99-2;C9J201;F8W4U4       | Fungicide resistance factor G, mitochondrial                                                 |           |          |          |                           |              |              |   |



|      |                                                                                                                  |                   |          |          |                           |              |              |   |
|------|------------------------------------------------------------------------------------------------------------------|-------------------|----------|----------|---------------------------|--------------|--------------|---|
| 2716 | Q9BQ95;J3KTF5;K7E1I1;Q9BQ95-3;K7I Evolutionarily conserved signaling intermediate in Toll pathway, mitochondrial | EC5IT             | CTSD/PBS | EC5IT    | not considered/background | 0,376179232  | 0,077117129  | 2 |
| 2718 | Q9BQ95;J3KTF5;K7E1I1;Q9BQ95-3;K7I Synaptotagmin-3                                                                | SVT3              | CTSD/PBS | SVT3     | not considered/background |              |              | 0 |
| 2719 | Q9BQ95;J3KTF5;K7E1I1;Q9BQ95-3;K7I PH and SEC7 domain-containing protein 2                                        | PSD2              | CTSD/PBS | PSD2     | not considered/background | 0,043064479  |              | 1 |
| 2720 | Q9BQ95;J3KTF5;K7E1I1;Q9BQ95-3;K7I C15orf3                                                                        | CLT3B3            | CTSD/PBS | CLT3B3   | not considered/background | 0,17259498   | 0,359582674  | 1 |
| 2721 | Q9BQ95;J3KTF5;K7E1I1;Q9BQ95-3;K7I Sulfotransferase 4A1                                                           | SULT4A1           | CTSD/PBS | SULT4A1  | not considered/background | -0,203186315 |              | 1 |
| 2722 | Q9BQ95;J3KTF5;K7E1I1;Q9BQ95-3;K7I Coronin-18;Coronin                                                             | CORO18            | CTSD/PBS | CORO18   | not considered/background | -0,159911462 | 0,028469321  | 2 |
| 2723 | Q9BQ95;J3KTF5;K7E1I1;Q9BQ95-3;K7I Thioredoxin domain-containing protein 17                                       | TXNDC17           | CTSD/PBS | TXNDC17  | not considered/background | 0,015069322  | -0,490775482 | 2 |
| 2724 | Q9BQ95;J3KTF5;K7E1I1;Q9BQ95-3;K7I Serine/threonine-protein phosphatase CPPED1                                    | CPPED1            | CTSD/PBS | CPPED1   | not considered/background |              |              | 0 |
| 2726 | Q9BQ95;J3KTF5;K7E1I1;Q9BQ95-3;K7I Transmembrane protein 246                                                      | TMEM246           | CTSD/PBS | TMEM246  | not considered/background |              |              | 0 |
| 2728 | Q9BQ95;J3KTF5;K7E1I1;Q9BQ95-3;K7I Ubiquitin-cytochrome c reductase complex assembly factor 2                     | UQCRC2            | CTSD/PBS | UQCRC2   | not considered/background |              |              | 0 |
| 2729 | Q9BQ95;J3KTF5;K7E1I1;Q9BQ95-3;K7I Endoplasmic reticulum resident protein 44                                      | ERP44             | CTSD/PBS | FAU213A  | not considered/background | -0,18376895  | -0,107152199 | 2 |
| 2730 | Q9BQ95;J3KTF5;K7E1I1;Q9BQ95-3;K7I Uncharacterized protein C19orf52                                               | C19orf52          | CTSD/PBS | ERP44    | not considered/background | 0,136060107  | -0,07299756  | 2 |
| 2732 | Q9BQ95;J3KTF5;K7E1I1;Q9BQ95-3;K7I Translational activator of cytochrome c oxidase 1                              | TACO1             | CTSD/PBS | C19orf52 | not considered/background |              |              | 0 |
| 2733 | Q9BQ95;J3KTF5;K7E1I1;Q9BQ95-3;K7I Haloacid dehalogenase-like hydrolase domain-containing protein 3               | HDH03             | CTSD/PBS | TACO1    | not considered/background | 0,448795255  | 0,472549268  | 1 |
| 2734 | Q9BQ95;J3KTF5;K7E1I1;Q9BQ95-3;K7I Extended synaptotagmin-1                                                       | ESYT1             | CTSD/PBS | HDH03    | not considered/background | -0,402092261 | 0,086338879  | 2 |
| 2735 | Q9BQ95;J3KTF5;K7E1I1;Q9BQ95-3;K7I Solute carrier family 25 member 33;Solute carrier family 25 member 36          | SLC25A33;SLC25A36 | CTSD/PBS | ESYT1    | not considered/background |              |              | 0 |
| 2736 | Q9BQ95;J3KTF5;K7E1I1;Q9BQ95-3;K7I Protein canopy homolog 3                                                       | CNPY3             | CTSD/PBS | SLC25A33 | not considered/background | 0,313245852  | 0,425578736  | 2 |
| 2737 | Q9BQ95;J3KTF5;K7E1I1;Q9BQ95-3;K7I Synaptotagmin-11                                                               | SVT11             | CTSD/PBS | CNPY3    | not considered/background | 0,399444565  | 0,660697923  | 2 |
| 2738 | Q9BQ95;J3KTF5;K7E1I1;Q9BQ95-3;K7I Dynactin subunit 5                                                             | CTCN5             | CTSD/PBS | SVT11    | not considered/background |              | -0,121413331 | 1 |
| 2739 | Q9BQ95;J3KTF5;K7E1I1;Q9BQ95-3;K7I Leucine-rich repeat and fibronectin type-III domain-containing protein 3       | LRFN3             | CTSD/PBS | CTCN5    | not considered/background |              |              | 0 |
| 2740 | Q9BQ95;J3KTF5;K7E1I1;Q9BQ95-3;K7I Phosphatidylinositol 4-kinase type 2-alpha                                     | PI4K2A            | CTSD/PBS | LRFN3    | not considered/background | 0,51772922   | -0,01235413  | 2 |
| 2741 | Q9BQ95;J3KTF5;K7E1I1;Q9BQ95-3;K7I Transmembrane protein 43                                                       | TMEM43            | CTSD/PBS | PI4K2A   | not considered/background | 0,072860402  | 0,069209686  | 2 |
| 2742 | Q9BQ95;J3KTF5;K7E1I1;Q9BQ95-3;K7I Fibronectin type III and SPRY domain-containing protein 1                      | FSD1              | CTSD/PBS | TMEM43   | not considered/background | -0,097116037 | -0,247198389 | 2 |
| 2743 | Q9BQ95;J3KTF5;K7E1I1;Q9BQ95-3;K7I Plasma alpha-L-fucosidase                                                      | FUCA2             | CTSD/PBS | FSD1     | not considered/background | 0,204015477  |              | 1 |
| 2744 | Q9BQ95;J3KTF5;K7E1I1;Q9BQ95-3;K7I NADPH dehydrogenase (ubiquinone) 1 alpha subcomplex assembly factor 3          | NDUFAF3           | CTSD/PBS | FUCA2    | not considered/background | 0,506094112  | 0,575615328  | 2 |
| 2747 | Q9BQ95;J3KTF5;K7E1I1;Q9BQ95-3;K7I Transmembrane protein 70, mitochondrial                                        | TMEM70            | CTSD/PBS | NDUFAF3  | not considered/background |              |              | 0 |
| 2748 | Q9BQ95;J3KTF5;K7E1I1;Q9BQ95-3;K7I Iron-sulfur cluster assembly 1 homolog, mitochondrial                          | ISCA1             | CTSD/PBS | TMEM70   | not considered/background |              |              | 0 |
| 2749 | Q9BQ95;J3KTF5;K7E1I1;Q9BQ95-3;K7E1 Tubulin beta-6 chain                                                          | TUBB6             | CTSD/PBS | ISCA1    | not considered/background |              | -0,206268125 | 2 |
| 2750 | Q9BQ95;J3KTF5;K7E1I1;Q9BQ95-3;K7E1 Monoacylglycerol lipase ABHD6                                                 | ABHD6             | CTSD/PBS | TUBB6    | not considered/background |              |              | 0 |
| 2751 | Q9BQ95;J3KTF5;K7E1I1;Q9BQ95-3;K7E1 Trans-2-enoyl-CoA reductase, mitochondrial                                    | MECR              | CTSD/PBS | ABHD6    | not considered/background |              | 0,092155617  | 1 |
| 2752 | Q9BQ95;J3KTF5;K7E1I1;Q9BQ95-3;K7E1 Katanin p60 WD40 repeat-containing subunit B1                                 | KATNB1            | CTSD/PBS | MECR     | not considered/background |              |              | 0 |
| 2753 | Q9BQ95;J3KTF5;K7E1I1;Q9BQ95-3;K7E1 Tubulin beta-2B chain                                                         | TUBB2B            | CTSD/PBS | KATNB1   | not considered/background | -0,185158424 | -0,15924166  | 2 |
| 2755 | Q9BQ95;J3KTF5;K7E1I1;Q9BQ95-3;K7E1 Transmembrane emp24 domain-containing protein 9                               | TMED9             | CTSD/PBS | TUBB2B   | not considered/background | -0,018614929 | -0,03407482  | 2 |
| 2756 | Q9BQ95;J3KTF5;K7E1I1;Q9BQ95-3;K7E1 Tubulin polymerization-promoting protein family member 3                      | TPPP3             | CTSD/PBS | TMED9    | not considered/background | 0,195347598  | 0,355959157  | 2 |
| 2758 | Q9BQ95;J3KTF5;K7E1I1;Q9BQ95-3;K7E1 ADP-ribose pyrophosphatase, mitochondrial                                     | NUDT9             | CTSD/PBS | TPPP3    | not considered/background |              |              | 0 |
| 2759 | Q9BQ95;J3KTF5;K7E1I1;Q9BQ95-3;K7E1 Acetyl-CoA acetyltransferase, cytosolic                                       | ACAT2             | CTSD/PBS | NUDT9    | not considered/background | -0,416095864 | -0,360420466 | 2 |
| 2760 | Q9BQ95;J3KTF5;K7E1I1;Q9BQ95-3;K7E1 RNA-binding protein 4;RNA-binding protein 4B                                  | RBMA;RBMA4B       | CTSD/PBS | ACAT2    | not considered/background |              |              | 0 |
| 2761 | Q9BQ95;J3KTF5;K7E1I1;Q9BQ95-3;K7E1 FUN14 domain-containing protein 2                                             | FUNDC2            | CTSD/PBS | RBMA     | not considered/background |              |              | 0 |
| 2762 | Q9BQ95;J3KTF5;K7E1I1;Q9BQ95-3;K7E1 Sideroflexin-3                                                                | SPXN3             | CTSD/PBS | FUNDC2   | not considered/background |              |              | 0 |
| 2763 | Q9BQ95;J3KTF5;K7E1I1;Q9BQ95-3;K7E1 Chitinase domain-containing protein 1                                         | CHND1             | CTSD/PBS | SPXN3    | not considered/background | 0,308244364  | 0,397163088  | 2 |
| 2764 | Q9BQ95;J3KTF5;K7E1I1;Q9BQ95-3;K7E1 Junctional adhesion molecule C                                                | JAM3              | CTSD/PBS | CHND1    | not considered/background | 0,329755086  | 0,119134272  | 2 |
| 2765 | Q9BQ95;J3KTF5;K7E1I1;Q9BQ95-3;K7E1 Histidine triad nucleotide-binding protein 2, mitochondrial                   | HINT2             | CTSD/PBS | JAM3     | not considered/background | 0,424384672  |              | 1 |
| 2767 | Q9BQ95;J3KTF5;K7E1I1;Q9BQ95-3;K7E1 Bcl-2-like protein 13                                                         | BCL2L13           | CTSD/PBS | HINT2    | not considered/background | -0,313584636 | 0,418253482  | 2 |
| 2768 | Q9BQ95;J3KTF5;K7E1I1;Q9BQ95-3;K7E1 Solute carrier family 12 member 9                                             | SLC12A9           | CTSD/PBS | BCL2L13  | not considered/background |              |              | 0 |
| 2769 | Q9BQ95;J3KTF5;K7E1I1;Q9BQ95-3;K7E1 A complex subunit mu-1                                                        | AP1M1             | CTSD/PBS | SLC12A9  | not considered/background |              | 0,013042848  | 1 |
| 2770 | Q9BQ95;J3KTF5;K7E1I1;Q9BQ95-3;K7E1 Cat eye syndrome critical region protein 5                                    | CECR5             | CTSD/PBS | AP1M1    | not considered/background |              | -0,040743821 | 1 |
| 2771 | Q9BQ95;J3KTF5;K7E1I1;Q9BQ95-3;K7E1 Inosine triphosphatase pyrophosphatase                                        | ITPA              | CTSD/PBS | CECR5    | not considered/background |              |              | 0 |
| 2773 | Q9BQ95;J3KTF5;K7E1I1;Q9BQ95-3;K7E1 39S ribosomal protein L13, mitochondrial                                      | MRPL13            | CTSD/PBS | ITPA     | not considered/background | 0,19761381   | 0,199371326  | 2 |
| 2774 | Q9BQ95;J3KTF5;K7E1I1;Q9BQ95-3;K7E1 39S ribosomal protein L9, mitochondrial                                       | MRPL9             | CTSD/PBS | MRPL13   | not considered/background |              |              | 0 |
| 2775 | Q9BQ95;J3KTF5;K7E1I1;Q9BQ95-3;K7E1 39S ribosomal protein L1, mitochondrial                                       | MRPL1             | CTSD/PBS | MRPL9    | not considered/background | 0,478195258  | 0,395131618  | 2 |
| 2776 | Q9BQ95;J3KTF5;K7E1I1;Q9BQ95-3;K7E1 28S ribosomal protein S26, mitochondrial                                      | MRPS26            | CTSD/PBS | MRPL1    | not considered/background | 0,14860877   | 0,100747015  | 2 |
| 2777 | Q9BQ95;J3KTF5;K7E1I1;Q9BQ95-3;K7E1 Nucleosyl, mitochondrial                                                      | NLN               | CTSD/PBS | MRPS26   | not considered/background | 0,477884522  | 0,222094295  | 2 |
| 2778 | Q9BQ95;J3KTF5;K7E1I1;Q9BQ95-3;K7E1 39S ribosomal protein L37, mitochondrial                                      | MRPL37            | CTSD/PBS | NLN      | not considered/background | 0,477884522  | 0,66266588   | 2 |
| 2779 | Q9BQ95;J3KTF5;K7E1I1;Q9BQ95-3;K7E1 Oxyester-binding protein 8;Oxyester-binding protein                           | OSBPL8            | CTSD/PBS | MRPL37   | not considered/background | -0,33524412  | 0,245505819  | 2 |
| 2783 | Q9BQ95;J3KTF5;K7E1I1;Q9BQ95-3;K7E1 Semaphorin-4C                                                                 | SEMA4C            | CTSD/PBS | OSBPL8   | not considered/background |              |              | 0 |
| 2784 | Q9BQ95;J3KTF5;K7E1I1;Q9BQ95-3;K7E1 E2/E3 hybrid ubiquitin-protein ligase UBE2O                                   | UBE2O             | CTSD/PBS | SEMA4C   | not considered/background | -0,050024389 | 0,18229489   | 2 |
| 2785 | Q9BQ95;J3KTF5;K7E1I1;Q9BQ95-3;K7E1 Protein unapack                                                               | LNP               | CTSD/PBS | UBE2O    | not considered/background | 0,189919418  | -0,265316867 | 2 |
| 2786 | Q9BQ95;J3KTF5;K7E1I1;Q9BQ95-3;K7E1 Dynein heavy chain 6, axonemal                                                | DNAH6             | CTSD/PBS | LNP      | not considered/background |              |              | 0 |
| 2787 | Q9BQ95;J3KTF5;K7E1I1;Q9BQ95-3;K7E1 Protein tweety homolog 3;Protein tweety homolog                               | TYH3              | CTSD/PBS | DNAH6    | not considered/background | -0,120529475 | 0,088208727  | 2 |
| 2788 | Q9BQ95;J3KTF5;K7E1I1;Q9BQ95-3;K7E1 UPRB68 protein C20orf72                                                       | C20orf72          | CTSD/PBS | TYH3     | not considered/background | 0,282854909  | -0,10272531  | 2 |
| 2790 | Q9BQ95;J3KTF5;K7E1I1;Q9BQ95-3;K7E1 PITH domain-containing protein 1                                              | PITH1             | CTSD/PBS | C20orf72 | not considered/background | 0,032806145  | -0,117030053 | 2 |
| 2791 | Q9BQ95;J3KTF5;K7E1I1;Q9BQ95-3;K7E1 SR stem-loop-interacting RNA-binding protein, mitochondrial                   | SLIRP             | CTSD/PBS | PITH1    | not considered/background | 0,239642442  | 0,344281819  | 2 |
| 2792 | Q9BQ95;J3KTF5;K7E1I1;Q9BQ95-3;K7E1 Serine racemase                                                               | SRR               | CTSD/PBS | SLIRP    | not considered/background |              |              | 0 |
| 2793 | Q9BQ95;J3KTF5;K7E1I1;Q9BQ95-3;K7E1 QIF3-like protein 1                                                           | NIF3L1            | CTSD/PBS | SRR      | not considered/background |              | 0,03297899   | 1 |
| 2794 | Q9BQ95;J3KTF5;K7E1I1;Q9BQ95-3;K7E1 Muco-1                                                                        | MCOLN1            | CTSD/PBS | NIF3L1   | not considered/background |              |              | 0 |
| 2795 | Q9BQ95;J3KTF5;K7E1I1;Q9BQ95-3;K7E1 Mitochondrial fission factor                                                  | MFF               | CTSD/PBS | MCOLN1   | not considered/background | 0,349931373  | 0,303614397  | 2 |
| 2796 | Q9BQ95;J3KTF5;K7E1I1;Q9BQ95-3;K7E1 Mitochondrial fission regulator 1-like                                        | MIFR1L            | CTSD/PBS | MFF      | not considered/background |              | 0,129970715  | 2 |
| 2797 | Q9BQ95;J3KTF5;K7E1I1;Q9BQ95-3;K7E1 Transmembrane protein 126A                                                    | TMEM126A          | CTSD/PBS | MIFR1L   | not considered/background |              |              | 0 |
| 2798 | Q9BQ95;J3KTF5;K7E1I1;Q9BQ95-3;K7E1 Polyadenylation-binding protein-interacting protein 1                         | PAIP1             | CTSD/PBS | TMEM126A | not considered/background | 0,202762485  | -0,367818344 | 2 |
| 2799 | Q9BQ95;J3KTF5;K7E1I1;Q9BQ95-3;K7E1 Caseinolytic peptidase B protein homolog                                      | CLPB              | CTSD/PBS | PAIP1    | not considered/background | 0,040100683  | 0,191096043  | 2 |
| 2800 | Q9BQ95;J3KTF5;K7E1I1;Q9BQ95-3;K7E1 Kinesin light chain 2                                                         | KLC2              | CTSD/PBS | CLPB     | not considered/background |              |              | 0 |
| 2801 | Q9BQ95;J3KTF5;K7E1I1;Q9BQ95-3;K7E1 Toll-interacting protein                                                      | TOLLIP            | CTSD/PBS | KLC2     | not considered/background | -0,264997807 | 0,079310347  | 2 |
| 2802 | Q9BQ95;J3KTF5;K7E1I1;Q9BQ95-3;K7E1 Cytosolic 5A;5-nucleotidase                                                   | NTS5C3A           | CTSD/PBS | TOLLIP   | not considered/background |              |              | 0 |
| 2803 | Q9BQ95;J3KTF5;K7E1I1;Q9BQ95-3;K7E1 FOXD domain-containing protein 6                                              | FOXD6             | CTSD/PBS | NTS5C3A  | not considered/background | 0,171719239  | 0,01636896   | 2 |
| 2804 | Q9BQ95;J3KTF5;K7E1I1;Q9BQ95-3;K7E1 Rab-related protein Rab-18;Putative Rab-related protein Rab-1C                | RAB18             | CTSD/PBS | FOXD6    | not considered/background | -0,339746764 | 0,024545897  | 2 |
| 2805 | Q9BQ95;J3KTF5;K7E1I1;Q9BQ95-3;K7E1 Probable serine carboxypeptidase CPVL                                         | CPVL              | CTSD/PBS | RAB18    | not considered/background |              |              | 0 |
| 2806 | Q9BQ95;J3KTF5;K7E1I1;Q9BQ95-3;K7E1 Growth hormone-inducible transmembrane protein                                | GHTM              | CTSD/PBS | CPVL     | not considered/background | -0,284089062 | -0,227987459 | 2 |
| 2807 | Q9BQ95;J3KTF5;K7E1I1;Q9BQ95-3;K7E1 Thiodoxin-related transmembrane protein 1A/18 light chain 3A                  | TMX4              | CTSD/PBS | GHTM     | not considered/background | 0,162210036  | 0,220849563  | 2 |
| 2808 | Q9BQ95;J3KTF5;K7E1I1;Q9BQ95-3;K7E1 Sodium-dependent neutral amino acid transporter SLC6A17                       | SLC6A17           | CTSD/PBS | TMX4     | not considered/background | 0,162210036  | 0,220849563  | 2 |
| 2810 | Q9BQ95;J3KTF5;K7E1I1;Q9BQ95-3;K7E1 Synaptotagmin-4                                                               | SVT4              | CTSD/PBS | SLC6A17  | not considered/background | -0,072990353 | -0,34339944  | 2 |
| 2811 | Q9BQ95;J3KTF5;K7E1I1;Q9BQ95-3;K7E1 Glyoxonin                                                                     | GAN               | CTSD/PBS | SVT4     | not considered/background |              |              | 0 |
| 2812 | Q9BQ95;J3KTF5;K7E1I1;Q9BQ95-3;K7E1 STE20-like serine/threonine-protein kinase                                    | SLK               | CTSD/PBS | GAN      | not considered/background |              |              | 0 |
| 2813 | Q9BQ95;J3KTF5;K7E1I1;Q9BQ95-3;K7E1 Translation initiation factor IF-3, mitochondrial                             | MTIF3             | CTSD/PBS | SLK      | not considered/background |              |              | 0 |
| 2814 | Q9BQ95;J3KTF5;K7E1I1;Q9BQ95-3;K7E1 Rab3 GTPase-activating protein non-catalytic subunit                          | RAB3GAP2          | CTSD/PBS | MTIF3    | not considered/background | 0,281549893  |              | 1 |
| 2815 | Q9BQ95;J3KTF5;K7E1I1;Q9BQ95-3;K7E1 Inorganic pyrophosphatase 2, mitochondrial                                    | PPA2              | CTSD/PBS | RAB3GAP2 | not considered/background | 0,441589712  | 0,474251823  | 2 |
| 2816 | Q9BQ95;J3KTF5;K7E1I1;Q9BQ95-3;K7E1 39S ribosomal protein L46, mitochondrial                                      | MRPL46            | CTSD/PBS | PPA2     | not considered/background |              |              | 0 |
| 2817 | Q9BQ95;J3KTF5;K7E1I1;Q9BQ95-3;K7E1 Solute carrier family 12 member 5                                             | SLC12A5           | CTSD/PBS | MRPL46   | not considered/background | -0,355588924 | -0,130403762 | 2 |
| 2818 | Q9BQ95;J3KTF5;K7E1I1;Q9BQ95-3;K7E1 Transmembrane protein 241                                                     | TMEM245           | CTSD/PBS | SLC12A5  | not considered/background | -0,283778292 | 0,101784524  | 2 |
| 2819 | Q9BQ95;J3KTF5;K7E1I1;Q9BQ95-3;K7E1 Probable serine carboxypeptidase CPVL                                         | CPVL              | CTSD/PBS | TMEM245  | not considered/background |              | -0,767485309 | 1 |
| 2820 | Q9BQ95;J3KTF5;K7E1I1;Q9BQ95-3;K7E1 Growth hormone-inducible transmembrane protein                                | GHTM              | CTSD/PBS | CPVL     | not considered/background | 0,210513552  | 0,299631309  | 2 |
| 2821 | Q9BQ95;J3KTF5;K7E1I1;Q9BQ95-3;K7E1 Thiodoxin-related transmembrane protein 1                                     | TMX1              | CTSD/PBS | GHTM     | not considered/background | 0,27524549   | -0,277637016 | 2 |
| 2822 | Q9BQ95;J3KTF5;K7E1I1;Q9BQ95-3;K7E1 Golgi resident protein CCP60                                                  | ACB03             | CTSD/PBS | TMX1     | not considered/background |              |              | 0 |
| 2823 | Q9BQ95;J3KTF5;K7E1I1;Q9BQ95-3;K7E1 Tyrosine-protein phosphatase non-receptor type 23                             | PTPN23            | CTSD/PBS | ACB03    | not considered/background |              |              | 0 |
| 2824 | Q9BQ95;J3KTF5;K7E1I1;Q9BQ95-3;K7E1 Pancreatic progenitor cell differentiation and proliferation factor           | PPDPF             | CTSD/PBS | PTPN23   | not considered/background |              |              | 0 |
| 2825 | Q9BQ95;J3KTF5;K7E1I1;Q9BQ95-3;K7E1 Oral homolog subfamily C member 5                                             | DNAICS            | CTSD/PBS | PPDPF    | not considered/background | 0,047119549  |              | 1 |
| 2826 | Q9BQ95;J3KTF5;K7E1I1;Q9BQ95-3;K7E1 Charged multivesicular body protein 4b                                        | CHMP4B            | CTSD/PBS | DNAICS   | not considered/background |              | -0,166586914 | 1 |
| 2827 | Q9BQ95;J3KTF5;K7E1I1;Q9BQ95-3;K7E1 Fructosamine-3-kinase                                                         | FN3K              | CTSD/PBS | CHMP4B   | not considered/background | 0,266036894  | 0,04820335   | 2 |
| 2828 | Q9BQ95;J3KTF5;K7E1I1;Q9BQ95-3;K7E1 Microtubule-associated proteins 1A/18 light chain 3A                          | MAP1LC3A          | CTSD/PBS | FN3K     | not considered/background | 0,381061828  | -0,060185765 | 2 |
| 2829 | Q9BQ95;J3KTF5;K7E1I1;Q9BQ95-3;K7E1 Band 4.1-like protein 1                                                       | EPB41L1           | CTSD/PBS | MAP1LC3A | not considered/background | 0,016353684  | 0,27435480   |   |

|      |                                   |                                                                                              |                       |          |          |                           |              |              |   |
|------|-----------------------------------|----------------------------------------------------------------------------------------------|-----------------------|----------|----------|---------------------------|--------------|--------------|---|
| 2881 | Q9NP97;Q8TF09;H3BNG9;H3BPA0;Q9    | Dynein light chain roadblock-type 1;Dynein light chain roadblock-type 2                      | DYLNRL1,DYLNRL2       | CTSD/PBS | DYLNRL1  | not considered/background |              |              |   |
| 2882 | Q9NP42-2;Q9NP42-3;Q9NP42-3;J3KR1  | Inositol 3-phosphate synthase 1                                                              | ISYNA1                | CTSD/PBS | ISYNA1   | not considered/background | -0.335553569 | -0.054362288 | 1 |
| 2883 | Q9NP13;Q9NP13-2                   | Acyl-coenzyme A thioesterase 13;Acyl-coenzyme A thioesterase 13, N-terminally processed      | ACOT13                | CTSD/PBS | ACOT13   | not considered/background | 0.109561152  | 0.211782041  | 2 |
| 2884 | Q9NR18;C9J105;G3XAA0              | Complex I assembly factor TIMMDC1, mitochondrial                                             | TIMMDC1               | CTSD/PBS | TIMMDC1  | not considered/background |              |              | 0 |
| 2885 | Q9NPQ8-2;Q9NPQ8-4;Q9NPQ8;Q9NP     | Syntenin-4                                                                                   | RICB8A                | CTSD/PBS | RICB8A   | not considered/background |              |              | 0 |
| 2886 | Q9NQ11-2;Q9NQ11-3;Q9NQ11-3;H0Y95  | Probable cation-transporting ATPase 13A2                                                     | ATP13A2               | CTSD/PBS | ATP13A2  | not considered/background |              |              | 0 |
| 2888 | Q9NQ66;Q9NQ66-2;Q9NQ66;Q9NQ66;A0J | 1-phosphatidyl nucleotid 4,5-bisphosphate phosphodiesterase beta-1;Phosphoinositide phosphol | PLCB1                 | CTSD/PBS | PLCB1    | not considered/background | -0.380352233 | -0.10433666  | 2 |
| 2890 | Q9NQC3;Q9NQC3-6;Q9NQC3-3;Q9NQC    | Retin-4                                                                                      | RTN4                  | CTSD/PBS | RTN4     | not considered/background | -0.097748869 | -0.17161344  | 2 |
| 2893 | Q9NQE9                            | Histidine triad nucleotide-binding protein 3                                                 | HINT3                 | CTSD/PBS | HINT3    | not considered/background | 0.236829335  | 0.012818129  | 2 |
| 2895 | Q9NQ84;H7C579;F8WF70              | Omega-amidase NIT2                                                                           | NIT2                  | CTSD/PBS | NIT2     | not considered/background | -0.491186604 | -0.187387707 | 2 |
| 2897 | Q9NR28-2;Q9NR28;A0A0874RBT-2;Q9N  | Diablo homolog, mitochondrial                                                                | DIABLO                | CTSD/PBS | DIABLO   | not considered/background | 0.272947418  | 0.157130044  | 2 |
| 2898 | Q9NR31;X1W122;D6RAA2;Q5SQ78;D6    | GTP-binding protein SAR1a;GTP-binding protein SAR1b                                          | SAR1A-SAR1B           | CTSD/PBS | SAR1A    | not considered/background | -0.183211906 | 0.00129901   | 0 |
| 2899 | Q9NR45;Q5TBR0                     | Sialic acid synthase                                                                         | NANS                  | CTSD/PBS | NANS     | not considered/background |              |              | 0 |
| 2900 | Q9NR42-2;Q9NR42                   | Sialin                                                                                       | SLC17A5               | CTSD/PBS | SLC17A5  | not considered/background |              |              | 0 |
| 2901 | Q9NRN7;E9PLW6;E9PNF3;Q9NRN7-2     | L-aminoadipate-semialdehyde dehydrogenase-phosphopantetheinyl transferase                    | AASDHPPT              | CTSD/PBS | AASDHPPT | not considered/background | -0.503506971 | -0.170437869 | 2 |
| 2902 | Q9NRK5;Q9NRK5-2                   | Ubiquitin-4                                                                                  | UBQLN4                | CTSD/PBS | UBQLN4   | not considered/background |              |              | 0 |
| 2903 | Q9NRV9;A0A3831RV5;F5GWX2;H0YGT    | Heme-binding protein 1                                                                       | HEBP1                 | CTSD/PBS | HEBP1    | not considered/background | 0.045163352  | -0.018206857 | 2 |
| 2904 | Q9NRW6;Q9NRW1-2;J3KR73;C9J1U4     | Ras-related protein Rab-6B                                                                   | RAB6B                 | CTSD/PBS | RAB6B    | not considered/background | -0.070133272 | -0.14834845  | 2 |
| 2905 | Q9NRK4;Q9NRK4-2                   | 14 kDa phosphohistidine phosphatase                                                          | PHPT1                 | CTSD/PBS | PHPT1    | not considered/background | 0.10353121   | -0.616953042 | 2 |
| 2906 | Q9NRX5                            | Serine incorporator 1                                                                        | SERINC1               | CTSD/PBS | SERINC1  | not considered/background | 0.271545198  | 0.322505288  | 2 |
| 2907 | Q9NR4                             | Rho GTPase-activating protein 35                                                             | ARHGAP35              | CTSD/PBS | ARHGAP35 | not considered/background | -0.219622707 | -0.056583528 | 2 |
| 2908 | Q9NR6;J3L3X5;J3L3L1;J3N129;J3L4F5 | Phospholipid scramblase 3                                                                    | PLSCR3;TMEM256-PLSCR3 | CTSD/PBS | PLSCR3   | not considered/background | 0.097610797  | -0.105678078 | 2 |
| 2909 | Q9NRZ5;Q9NRZ5-2;H0YSR3;Q6A125;G1  | 1-acyl-sn-glycerol 3-phosphate acyltransferase gamma                                         | AGPAT4                | CTSD/PBS | AGPAT4   | not considered/background | 0.151728955  | -0.162210036 | 2 |
| 2910 | Q9NRZ7-2;Q9NRZ7;Q9NRZ7-3          | 1-acyl-sn-glycerol 3-phosphate acyltransferase gamma                                         | AGPAT3                | CTSD/PBS | AGPAT3   | not considered/background |              |              | 0 |
| 2911 | Q9NS69                            | Mitochondrial inner receptor subunit TOM22 homolog                                           | TOMM22                | CTSD/PBS | TOMM22   | not considered/background | 0.249141903  | 0.483289979  | 2 |
| 2912 | Q9NS86                            | LINC-like protein 2                                                                          | LINC1                 | CTSD/PBS | LINC1    | not considered/background | -0.16291254  | -0.1215495   | 2 |
| 2913 | Q9NUQ2;H0YC22;E5RH21              | Phenylalanine-tRNA ligase beta subunit                                                       | FARS5                 | CTSD/PBS | FARS5    | not considered/background | 0.405447844  | 0.255459978  | 2 |
| 2914 | Q9NSE4                            | Isoleucine-tRNA ligase, mitochondrial                                                        | IARS2                 | CTSD/PBS | IARS2    | not considered/background | 0.31741985   | 0.234176743  | 2 |
| 2915 | Q9NT62;Q9NT62-2                   | Ubiquitin-like conjugating enzyme ATG3                                                       | ATG3                  | CTSD/PBS | ATG3     | not considered/background |              |              | 0 |
| 2916 | Q9NT99;M0R2G0;Q9HC12;Q9HBW1       | Leucine-rich repeat-containing protein 48                                                    | LRRCA4                | CTSD/PBS | LRRCA4   | not considered/background | -0.114925492 | -0.184597684 | 2 |
| 2917 | Q9NT12-1;Q9NT12;F8W9B3;F8VRS1;Q9  | Phospholipid-transporting ATPase B;Phospholipid-transporting ATPase                          | ATP8A2                | CTSD/PBS | ATP8A2   | not considered/background | -0.318002098 | -0.138552375 | 2 |
| 2919 | Q9NU11;Q9NU11-2;Q9NU11-3          | Mycoperoxidase acyl-glucuronide esterase, mitochondrial                                      | ABHD10                | CTSD/PBS | ABHD10   | not considered/background | 0.259905175  | 0.364034396  | 2 |
| 2920 | Q9NUV9;G3V104                     | Protein lin-7 homolog C                                                                      | LINC7                 | CTSD/PBS | LINC7    | not considered/background | -0.04733841  | 0.17142097   | 2 |
| 2921 | Q9NUQ2;H0YC22;E5RH21              | 1-acyl-sn-glycerol 3-phosphate acyltransferase epsilon                                       | AGPAT5                | CTSD/PBS | AGPAT5   | not considered/background | -0.116566864 | 0.10942101   | 2 |
| 2922 | Q9NUQ9;E5R116;Q9NUQ9-2;A0A1W2F    | Protein FAM49B                                                                               | FAM49B                | CTSD/PBS | FAM49B   | not considered/background |              |              | 0 |
| 2923 | Q9NU72-5;Q9NU72-4;Q9NU72-2;Q9N    | ATP-binding cassette sub-family B member 8                                                   | ATP8B                 | CTSD/PBS | ATP8B    | not considered/background |              |              | 0 |
| 2925 | Q9NVF7;E9PH76;H0YA26;H0Y9E4       | Pantothenate kinase 4                                                                        | PANK4                 | CTSD/PBS | PANK4    | not considered/background |              |              | 0 |
| 2926 | Q9NVG8;Q9NVG8-3;Q9NVG8-2          | TBC1 domain family member 13                                                                 | TBC1D13               | CTSD/PBS | TBC1D13  | not considered/background |              |              | 0 |
| 2928 | Q9NVH1-3;Q9NVH1;Q9NVH1-2;Q5TH6    | Dnal homolog subfamily C member 11                                                           | DNAI11                | CTSD/PBS | DNAI11   | not considered/background | 0.13553487   | 0.366168936  | 2 |
| 2929 | Q9NVH6-7;Q9NVH6-6;Q9NVH6-5;Q9N    | Trimethyllysine dihydrogenase, mitochondrial                                                 | TM6HE                 | CTSD/PBS | TM6HE    | not considered/background |              |              | 0 |
| 2930 | Q9NV17-2;Q9NV17;Q9NV17-3;Q5T9A4   | ATPase family AAA domain-containing protein 3A;ATPase family AAA domain-containing protein   | ATAD3A;ATAD3B         | CTSD/PBS | ATAD3A   | not considered/background | 0.245860702  | 0.300549474  | 2 |
| 2931 | Q9NV12;Q9NV12-2                   | ADP-ribosylation factor-like protein 8B                                                      | ARL8B                 | CTSD/PBS | ARL8B    | not considered/background | -0.75616034  | -0.060185765 | 2 |
| 2932 | Q9NV79;E5JR86;Q9NV79-2;E9PR92;E5  | Armadillo repeat-containing protein 1                                                        | ARMC1                 | CTSD/PBS | ARMC1    | not considered/background |              |              | 1 |
| 2933 | Q9NW15-4;Q9NW15-3;Q9NW15-3;C9H    | Anoctamin-10;Anoctamin                                                                       | ANO10                 | CTSD/PBS | ANO10    | not considered/background |              |              | 0 |
| 2934 | Q9NX00                            | Transmembrane protein 160                                                                    | TMEM160               | CTSD/PBS | TMEM160  | not considered/background | 0.253384236  |              | 1 |
| 2935 | Q9NX14;Q9NX14-2                   | NADH dehydrogenase [ubiquinone] 1 beta subcomplex subunit 11, mitochondrial                  | NDUF81                | CTSD/PBS | NDUF81   | not considered/background |              |              | 0 |
| 2936 | Q9NX20;E9P114                     | Oxyls ribosomal protein L16, mitochondrial                                                   | MRP16                 | CTSD/PBS | MRP16    | not considered/background | 0.373620373  | 0.608320252  | 2 |
| 2937 | Q9NX40;Q9NR8N5;Q9NX40-4;Q9NX40    | OCA domain-containing protein 1                                                              | OCA1D1                | CTSD/PBS | OCA1D1   | not considered/background | -0.068543859 | 0.310021032  | 2 |
| 2938 | Q9NX46                            | Poly(ADP-ribose) glycohydrolase ARH3                                                         | ADPRHL2               | CTSD/PBS | ADPRHL2  | not considered/background |              |              | 0 |
| 2939 | Q9NX47                            | ES ubiquitin-protein ligase MARCH5                                                           | MARCH5                | CTSD/PBS | MARCH5   | not considered/background | -0.075291992 | 0.503793334  | 2 |
| 2940 | Q9NXA8-2;Q9NXA8;Q9NXA8-4;Q9NXA    | NAD-dependent protein deacetylase sirtuin-5, mitochondrial                                   | SIRT5                 | CTSD/PBS | SIRT5    | not considered/background | 0.288299495  | 0.274386571  | 2 |
| 2941 | Q9NXG6;Q9NXG6-3;V5GY20;H7C153     | Transmembrane protein 4-hydroxylase                                                          | P4H1TM                | CTSD/PBS | P4H1TM   | not considered/background | 0.244156396  | 0.197663228  | 2 |
| 2942 | Q9NXN4-2;Q9NXN4                   | Ganglioside-induced differentiation-associated protein 2                                     | GDAP2                 | CTSD/PBS | GDAP2    | not considered/background |              |              | 0 |
| 2943 | Q9NY59;Q9NY59-2;H3B551            | Shingomyelin phosphodiesterase 3                                                             | SMRPD3                | CTSD/PBS | SMRPD3   | not considered/background | -0.268781995 | 0.065668394  | 2 |
| 2944 | Q9NY72;A0A590UJ05;A0A590UJ13      | Sodium channel subunit beta-3                                                                | SCN3B                 | CTSD/PBS | SCN3B    | not considered/background | 0.080521232  | 0.403923576  | 2 |
| 2946 | Q9NYK5-2;Q9NYK5;C9J587            | 39S ribosomal protein L39, mitochondrial                                                     | MRPL39                | CTSD/PBS | MRPL39   | not considered/background | -0.055246481 | 0.720921004  | 2 |
| 2947 | Q9NYQ7;Q9NYQ7-2                   | Cadherin EGF LA6 seven-pass G-type receptor 3                                                | CELSR3                | CTSD/PBS | CELSR3   | not considered/background |              |              | 0 |
| 2948 | Q9NYU2-2;Q9NYU2;H7BZG0;F8WC12     | F UDP-glucose:glycoprotein glucosyltransferase 1                                             | UGGT1                 | CTSD/PBS | UGGT1    | not considered/background | 0.017494379  | 0.110448581  | 2 |
| 2949 | Q9NYX4-2;Q9NYX4;Q9NYX4-3          | Neuron-specific vesicular protein calyxon                                                    | CALY                  | CTSD/PBS | CALY     | not considered/background |              |              | 0 |
| 2950 | Q9NZ01;M0R2N5;M0R3G3;Q9NZ01-2     | Very-long-chain enoyl-CoA reductase                                                          | TECR                  | CTSD/PBS | TECR     | not considered/background | -0.267670011 |              | 1 |
| 2951 | V5GYK7;Q9NZ23;G3V2C5;G3V5V4;F65   | Actin-related protein 1                                                                      | ACTR10                | CTSD/PBS | ACTR10   | not considered/background | -0.225110832 |              | 1 |
| 2952 | Q9NZ45                            | CDSG1 iron-sulfur domain-containing protein 1                                                | CDSG1                 | CTSD/PBS | CDSG1    | not considered/background | 0.16915521   | 0.054886763  | 2 |
| 2953 | Q9NZ53;Q9NZ53-2                   | Podocalyxin-like protein 2                                                                   | PODXL2                | CTSD/PBS | PODXL2   | not considered/background | 0.123003954  | 0.149728635  | 2 |
| 2954 | Q9NZ72;Q9NZ72-2;A0A0J9YW36;A0A    | Stathmin-3                                                                                   | STMN3                 | CTSD/PBS | STMN3    | not considered/background | 0.128557365  | 0.074642438  | 2 |
| 2955 | Q9NZ94-3;Q9NZ94-2;Q9NZ94;A0A08    | Neurologin-3                                                                                 | NLGN3                 | CTSD/PBS | NLGN3    | not considered/background | -0.214256962 |              | 1 |
| 2956 | Q9NZC3;H3B2U2                     | Glycerophosphodiester phosphodiesterase 1                                                    | GDE1                  | CTSD/PBS | GDE1     | not considered/background |              |              | 0 |
| 2958 | Q9NZ88;Q9NZ88-2                   | Insulin-like growth factor 2 mRNA-binding protein 1                                          | IGF2BP1               | CTSD/PBS | IGF2BP1  | not considered/background |              |              | 0 |
| 2959 | Q9NZ17-2;Q9NZ17;H0Y8C3;Q9NZ17-3   | Mitochondrial carrier homolog 1                                                              | MTC1                  | CTSD/PBS | MTC1     | not considered/background | -0.070799833 | -0.103396924 | 2 |
| 2960 | Q9NZK3;Q9NZK3-2;Q9NZK4            | Eh domain-containing protein 3                                                               | EH3                   | CTSD/PBS | EH3      | not considered/background | 0.194841131  | 0.13821441   | 2 |
| 2961 | Q9NZR1;Q9NZR1-2;G5CE42;H0YMA2;J   | Tropomodulin-2                                                                               | TMOO2                 | CTSD/PBS | TMOO2    | not considered/background | -0.18606493  | -0.369941022 | 2 |
| 2963 | Q9P032                            | NADH dehydrogenase [ubiquinone] 1 alpha subcomplex assembly factor 4                         | NDUFA4                | CTSD/PBS | NDUFA4   | not considered/background | 0.316956668  | 0.41717427   | 2 |
| 2964 | Q9P035;H3B572;H3B8P1;Q9P035-2;H   | Very-long-chain (3R)-3-hydroxyacyl-CoA dehydratase 3                                         | HACD3                 | CTSD/PBS | HACD3    | not considered/background | -0.09451046  | 0.105876837  | 2 |
| 2965 | Q9P012-2;Q9P012;S4R3U9;C9JLM9     | ER membrane protein complex subunit 3                                                        | EMC3                  | CTSD/PBS | EMC3     | not considered/background |              |              | 0 |
| 2966 | Q9P010;Q9P010-2;H4DEZ3;K7E1E1;E7E | NADH dehydrogenase [ubiquinone] 1 alpha subcomplex subunit 13                                | NDUFA13               | CTSD/PBS | NDUFA13  | not considered/background | 0.373271836  | 0.105244031  | 2 |
| 2967 | Q9P011;Q9P011-2                   | [Pyruvate dehydrogenase (lactyl)-transfering]phosphatase 1, mitochondrial                    | PDP1                  | CTSD/PBS | PDP1     | not considered/background | 0.052819914  |              | 0 |
| 2968 | Q9P0K9                            | CDGSH domain-containing protein FRSL1                                                        | FRSL1                 | CTSD/PBS | FRSL1    | not considered/background | -0.355829914 |              | 1 |
| 2969 | Q9P0L0;Q9P0L0-2;J3QKM9            | Vesicle-associated membrane protein-associated protein A                                     | VAPA                  | CTSD/PBS | VAPA     | not considered/background | 0.090988888  | 0.040422712  | 2 |
| 2971 | Q9P121-3;Q9P121-2;Q9P121;Q9P121   | Neurotrimin                                                                                  | NTM                   | CTSD/PBS | NTM      | not considered/background | 0.245495663  | 0.016638942  | 2 |
| 2972 | Q9P1W3                            | Calcium permeable stress-gated cation channel 1                                              | TMEM63C               | CTSD/PBS | TMEM63C  | not considered/background |              |              | 0 |
| 2973 | Q9P1Y5-2;Q9P1Y5;H0YE13            | Calmodulin-regulated spectrin-associated protein 3                                           | CAMSAP3               | CTSD/PBS | CAMSAP3  | not considered/background |              |              | 0 |
| 2974 | Q9P227-2;Q9P227;A0A087WXU2;A0A    | Rho GTPase-activating protein 23                                                             | ARHGAP23              | CTSD/PBS | ARHGAP23 | not considered/background |              |              | 0 |
| 2975 | Q9P244                            | Leucine-rich repeat and fibronectin type III domain-containing protein 1                     | LRFN1                 | CTSD/PBS | LRFN1    | not considered/background |              |              | 1 |
| 2976 | Q9P265                            | CDK-interacting protein 2 homolog B                                                          | DIP2B                 | CTSD/PBS | DIP2B    | not considered/background | -0.192661566 | 0.180593405  | 2 |
| 2977 | Q9P282                            | Prostaglandin F2 receptor negative regulator                                                 | PTGFRN                | CTSD/PBS | PTGFRN   | not considered/background | -0.027527902 | -0.105543992 | 2 |
| 2978 | Q9P2R3;Q9P2R3-2;Q9P2R3-4;J3L3P8   | Rabakyrin-5                                                                                  | ANKFY1                | CTSD/PBS | ANKFY1   | not considered/background |              |              | 0 |
| 2979 | Q9P2U8;Q9P2U7-2;Q9P2U7-3;Q9P2U    | Vesicular glutamate transporter 2                                                            | SLC17A6               | CTSD/PBS | SLC17A6  | not considered/background | -0.229263966 | -0.175811994 | 2 |
| 2980 | Q9P2X0;Q9P2X0-2                   | Dolichol-phosphate mannosyltransferase subunit 3                                             | DPM3                  | CTSD/PBS | DPM3     | not considered/background | 0.273814245  | -0.06072828  | 2 |
| 2981 | Q9UB84;A0A1W2PQD2;Q9UB84-2;B1     | Ataxin-10                                                                                    | ATXN10                | CTSD/PBS | ATXN10   | not considered/background | -0.25566663  | -0.067638717 | 2 |
| 2982 | Q9UB86-2;Q9UB86-3;C9J5H5E         | Neurochondrin                                                                                | NCN                   | CTSD/PBS | NCN      | not considered/background | -0.259478221 | -0.198619873 | 2 |
| 2983 | Q9UBH6;Q9UBH6-2                   | Xenotropic and polytropic retrovirus receptor 1                                              | XPR1                  | CTSD/PBS | XPR1     | not considered/background | 0.282261867  | 0.55488591   | 2 |
| 2984 | Q9UBI6                            | Guanine nucleotide-binding protein G(i)(L)/G(s)(L)/G(o) subunit gamma-12                     | GNGL12                | CTSD/PBS | GNGL12   | not considered/background | 0.148895004  | -1.350092025 | 2 |
| 2985 | Q9UBM7;E9PM00;E9P154;H0YE57;E9F   | 7-hydroxycholesterol reductase                                                               | DHCR7                 | CTSD/PBS | DHCR7    | not considered/background | 0.03562391   | 0.228756701  | 2 |
| 2986 | Q9UBQ7;U3KQ56;Q9UBQ7-2            | Glyoxylate reductase/hydroxypyruvate reductase                                               | GRHPR                 | CTSD/PBS | GRHPR    | not considered/background | -0.147062374 | -0.049351959 | 2 |
| 2988 | Q9UB54;H7C2Y5                     | Dnal homolog subfamily B member 11                                                           | DNAI11                | CTSD/PBS | DNAI11   | not considered/background | 0.263995882  | -0.085424656 | 2 |
| 2989 | Q9UBU6                            | Protein FAM8A1                                                                               | FAM8A1                | CTSD/PBS | FAM8A1   | not considered/background |              |              | 1 |
| 2990 | Q9UBV2;Q9UBV2-2;G3V3B3            | Protein sel-1 homolog 1                                                                      | SELL1                 | CTSD/PBS | SELL1    | not considered/background | 0.008056555  | 0.369240422  | 2 |
| 2991 | Q9UBV8                            | Peftin                                                                                       | PEF1                  | CTSD/PBS | PEF1     | not considered/background | 0.087327052  |              | 1 |
| 2992 | Q9UBW8;F5H4U8;F5H7C6;F5G0Y7;F5J   | COP9 signalosome complex subunit 7a                                                          | COP7A                 | CTSD/PBS | COP7A    | not considered/background | -0.173821248 |              | 1 |
| 2993 | Q9UDT6;Q9UDT6-2;H7C4L6            | CAP-Gly domain-containing linker protein 2                                                   | CLIP2                 | CTSD/PBS | CLIP2    | not considered/background | -0.278513592 | 0.172701252  | 2 |
| 2994 | Q9UDW1;Q9UDW1-2                   | Cytochrome b-c1 complex subunit 9                                                            | UCR10                 | CTSD/PBS | UCR10    | not considered/background | 0.044044333  |              | 1 |
| 2995 | Q9UDY4;C9JUL4                     | Dnal homolog subfamily B member 4                                                            | DNAI84                | CTSD/PBS | DNAI84   | not considered/background |              |              | 0 |
| 2996 | Q9UEU0;Q9UEU0-2;J3KMW2;G3V5I2     | Vesicle transport through interaction with t-SNAREs homolog 1B                               | VT1B                  | CTSD/PBS | VT1B     | not considered/background | 0.120750053  | 0.132261648  | 2 |
| 2997 | Q9UEW8-2;Q9UEW8                   | STE20/SPS1-related proline-alanine-rich protein kinase                                       | STK39                 | CTSD/PBS | STK39    | not considered/background | -0.701740533 | -0.19499604  | 2 |
| 2998 | Q9UFN0                            | Protein NipSnap homolog 3A                                                                   | NIPSNAP3              | CTSD/PBS | NIPSNAP3 | not considered/background | -0.014426708 | 0.025881896  | 2 |
| 2999 | Q9UGP8;A6PVC9                     | Translocation protein SEC33 homolog</                                                        |                       |          |          |                           |              |              |   |

|      |                                   |                                                                                                |                           |          |            |                           |  |               |   |
|------|-----------------------------------|------------------------------------------------------------------------------------------------|---------------------------|----------|------------|---------------------------|--|---------------|---|
| 3039 | Q9UL26;J3QR51;Q13636              | Ras-related protein Rab-22A                                                                    | RAB22A                    | CTSD/PBS | RAB22A     | not considered/background |  | -0,268913416  | 1 |
| 3040 | Q9ULC3                            | Ras-related protein Rab-23                                                                     | RAB23                     | CTSD/PBS | RAB23      | not considered/background |  | 0,05398786    | 2 |
| 3041 | Q9ULC4-2;Q9ULC4;Q9ULC4-3;A0A3B3   | Malignant T-cell-amplified sequence 1                                                          | MCT51                     | CTSD/PBS | MCT51      | not considered/background |  | -0,17114867   | 2 |
| 3042 | Q9ULD0;Q9ULD0-3;Q9ULD0-2          | 2-oxoglutarate dehydrogenase-like, mitochondrial                                               | OGDH1L                    | CTSD/PBS | OGDH1L     | not considered/background |  | -0,315913965  | 2 |
| 3043 | Q9ULF5;Q9ULF5-2;E7E7N5;E7E7A45    | Zinc transporter ZIP10                                                                         | SLC39A10                  | CTSD/PBS | SLC39A10   | not considered/background |  | -0,142348082  | 2 |
| 3044 | Q9ULH0-2;Q9ULH0-4;Q9ULH0;E9PH7    | Kinase D-interacting substrate of 220 kDa                                                      | KIDINS220                 | CTSD/PBS | KIDINS220  | not considered/background |  | 0,001297842   | 2 |
| 3045 | Q9ULK0;Q9ULK0-2;G3V186;O43424-2   | Glutamate receptor ionotropic, delta-1                                                         | GRID1                     | CTSD/PBS | GRID1      | not considered/background |  |               | 0 |
| 3046 | Q9ULK5                            | Vang-like protein 2                                                                            | VANGL2                    | CTSD/PBS | VANGL2     | not considered/background |  | 0,313245852   | 2 |
| 3047 | Q9ULP0-7;Q9ULP0-6;Q9ULP0-3;Q9ULP  | Protein NDRG4                                                                                  | NDRG4                     | CTSD/PBS | NDRG4      | not considered/background |  | -0,055981185  | 2 |
| 3048 | Q9ULV4-3;Q9ULV4-2;Q9ULV4;B4E350   | Coronin-13; Coronin                                                                            | CORO1C                    | CTSD/PBS | CORO1C     | not considered/background |  | 0,118891252   | 2 |
| 3049 | Q9UM00-1;Q9UM00-2;Q9UM00;J3KS     | Transmembrane and coiled-coil domain-containing protein 1                                      | TMC01                     | CTSD/PBS | TMC01      | not considered/background |  | -0,115706865  | 2 |
| 3050 | Q9UM19;B4DGW9                     | Hippocalcin-like protein 4                                                                     | HPCAL4                    | CTSD/PBS | HPCAL4     | not considered/background |  | -0,097455571  | 2 |
| 3051 | Q9UM22-2;Q9UM22-2;Q9UM22-2        | Mammalian ependymin-related protein 1                                                          | EPDR1                     | CTSD/PBS | EPDR1      | not considered/background |  | 0,017066724   | 2 |
| 3052 | Q9UMF0;K7EIL3                     | Intercellular adhesion molecule 5                                                              | ICAM5                     | CTSD/PBS | ICAM5      | not considered/background |  | -0,486044433  | 1 |
| 3053 | Q9UMX0-2;Q9UMX0;Q9UMX0-3;Q9UI     | Ubiquitin-1                                                                                    | UBQLN1                    | CTSD/PBS | UBQLN1     | not considered/background |  | -0,253687234  | 2 |
| 3054 | Q9UMX5                            | Neudensin                                                                                      | NENF                      | CTSD/PBS | NENF       | not considered/background |  |               | 0 |
| 3055 | Q9UM22-6;Q9UM22-9;Q9UM22-4;Q9I    | Synergizer gamma                                                                               | SYNRG                     | CTSD/PBS | SYNRG      | not considered/background |  | 0,18572031    | 1 |
| 3056 | Q9UN36;Q9UN36-2;Q9UN36-3;G3V45    | Protein NDRG2                                                                                  | NDRG2                     | CTSD/PBS | NDRG2      | not considered/background |  | -0,31433788   | 2 |
| 3057 | Q9UN74;A0A087W5W5;Q9UN74-2;A0     | Protocadherin alpha-4                                                                          | PCDH4A                    | CTSD/PBS | PCDH4A     | not considered/background |  | -0,21985791   | 2 |
| 3058 | Q9UN86-2;Q9UN86;D6RG14;D6RAC7     | Ras GTPase-activating protein-binding protein 2                                                | G3BP2                     | CTSD/PBS | G3BP2      | not considered/background |  |               | 0 |
| 3059 | Q9UNK0;J1L305;K7EQB1;J1L300;K7ER  | Syntaxin-8                                                                                     | STX8                      | CTSD/PBS | STX8       | not considered/background |  | 0,025595836   | 2 |
| 3060 | Q9UNN5;B3KT28;B1ANM7;Q9UNN5-2     | FAS-associated factor 1                                                                        | FAF1                      | CTSD/PBS | FAF1       | not considered/background |  | -0,118288401  | 2 |
| 3061 | Q9UN52;Q9UN52-2;H7C3P9;J3QKR0     | COP9 signalosome complex subunit 3                                                             | COP3S                     | CTSD/PBS | COP3S      | not considered/background |  |               | 0 |
| 3062 | Q9UNW1;Q9UNW1-3;Q9UNW1-4;Q9U1     | Multiple inositol polyphosphate phosphatase 1                                                  | MINPP1                    | CTSD/PBS | MINPP1     | not considered/background |  |               | 1 |
| 3063 | Q9UNZ2;Q9UNZ2-5;Q9UNZ2-4;Q9UNZ    | NF1L1 cofactor p47                                                                             | NSFL1C                    | CTSD/PBS | NSFL1C     | not considered/background |  | 0,160533009   | 2 |
| 3064 | Q9UPV7                            | Protein KIAA1045                                                                               | KIAA1045                  | CTSD/PBS | KIAA1045   | not considered/background |  | -0,33274231   | 2 |
| 3065 | Q9UPV6;Q9UPV6-2;A0A590JUI74       | Wiskott-Aldrich syndrome protein family member 3                                               | WASF3                     | CTSD/PBS | WASF3      | not considered/background |  | -0,105737561  | 1 |
| 3066 | Q9UPY8;C9J830                     | Microtubule-associated protein RP/ER family member 3                                           | MAPRE3                    | CTSD/PBS | MAPRE3     | not considered/background |  | -0,170053046  | 2 |
| 3068 | Q9UQ13;Q9UQ13-2;X6R37             | Leucine-rich repeat protein SHOC-2                                                             | SHOC2                     | CTSD/PBS | SHOC2      | not considered/background |  |               | 0 |
| 3069 | Q9UQ16-2;Q9UQ16-3;Q9UQ16;Q9UQ     | Dynamin-3                                                                                      | DNM3                      | CTSD/PBS | DNM3       | not considered/background |  | -0,324581486  | 2 |
| 3070 | Q9UQ49;Q9UQ49-2                   | Sialidase-3                                                                                    | NEU3                      | CTSD/PBS | NEU3       | not considered/background |  |               | 0 |
| 3071 | Q9UQ80-2;Q9UQ80;F8YR77;HOYN7;F    | Proliferation-associated protein 2G4                                                           | PA2G4                     | CTSD/PBS | PA2G4      | not considered/background |  | 0,253747285   | 2 |
| 3072 | Q9UQ83-2;Q9UQ83;E7EPC8;Q9UQ83-2   | F-actinin domain 2                                                                             | CTNND2                    | CTSD/PBS | CTNND2     | not considered/background |  | -0,227067701  | 2 |
| 3073 | Q9Y214;Q9Y1B9;G3VAC6              | UPF0568 protein C14orf166                                                                      | C14orf166                 | CTSD/PBS | C14orf166  | not considered/background |  |               | 0 |
| 3074 | Q9Y230;Q9Y230-2;MOR0Y3;X6R21;N    | RuvB-like 2                                                                                    | RUVBL2                    | CTSD/PBS | RUVBL2     | not considered/background |  | 0,438825113   | 2 |
| 3075 | Q9Y263;ESRIM3;HOYBWA;HOY1C6       | Phospholipase A2-activating protein                                                            | PLAA                      | CTSD/PBS | PLAA       | not considered/background |  | -0,15690053   | 2 |
| 3076 | Q9Y265;Q9Y265-2;E7ETR0;H7C4G5     | RuvB-like 1                                                                                    | RUVBL1                    | CTSD/PBS | RUVBL1     | not considered/background |  | 0,084472517   | 2 |
| 3077 | Q9Y266;A0A0A0MSU9;A0A0A0MS54      | Nuclear migration protein nudC                                                                 | NUDC                      | CTSD/PBS | NUDC       | not considered/background |  | -0,250611618  | 2 |
| 3078 | Q9Y276;C9J159;C9J8G3;H7C492;C9JF  | Mitochondrial chaperone BCS1                                                                   | BCS1L                     | CTSD/PBS | BCS1L      | not considered/background |  | 0,63282657    | 2 |
| 3079 | Q9Y277-2;Q9Y277;ESUN96;ESUN96     | Voltage-dependent anion-selective channel protein 3                                            | VDAC3                     | CTSD/PBS | VDAC3      | not considered/background |  | 0,152248331   | 2 |
| 3080 | Q9Y281;Q9Y281-3;F8WDN3            | Cofilin-2                                                                                      | CFI2                      | CTSD/PBS | CFI2       | not considered/background |  |               | 0 |
| 3081 | Q9Y285;Q9Y285-2;K7ER00;K7EPH2;K   | Phenylalanine-tRNA ligase alpha subunit                                                        | FARSA                     | CTSD/PBS | FARSA      | not considered/background |  | 0,566474224   | 2 |
| 3082 | Q9Y287;A0A383UC0;Q9Y287-2;A0A31   | Integral membrane protein 2B; BRI2, membrane form; BRI2 intracellular domain; BRI2C, soluble f | ITM2B                     | CTSD/PBS | ITM2B      | not considered/background |  | -0,313826296  | 2 |
| 3083 | Q9Y289                            | Sodium-dependent multivitamin transporter                                                      | SLCSA6                    | CTSD/PBS | SLCSA6     | not considered/background |  |               | 0 |
| 3084 | Q9Y2A7;Q9Y2A7-2                   | Nck-associated protein 1                                                                       | NCKAP1                    | CTSD/PBS | NCKAP1     | not considered/background |  | -0,227286641  | 2 |
| 3085 | Q9Y2C4;Q9Y2C4-3;Q9Y2C4-4;Q9Y2C4   | Nuclease EXOG, mitochondrial                                                                   | EXOG                      | CTSD/PBS | EXOG       | not considered/background |  |               | 0 |
| 3086 | Q9Y2H0-3;Q9Y2H0-1;Q9Y2H0-4;Q9Y2H  | Disk large-associated protein 4                                                                | DLGAP4                    | CTSD/PBS | DLGAP4     | not considered/background |  | 0,363675722   | 2 |
| 3087 | Q9Y2H6-2;Q9Y2H6;G5S9C3;A0A087X    | Fibronectin type-III domain-containing protein 3A                                              | FND3C3A                   | CTSD/PBS | FND3C3A    | not considered/background |  | -0,0018742861 | 2 |
| 3088 | Q9Y2I2-2;Q9Y2I2-1;Q9Y2I2-5;Q9Y2I2 | Netrin-G1                                                                                      | NTNG1                     | CTSD/PBS | NTNG1      | not considered/background |  | -0,062806289  | 2 |
| 3090 | Q9Y2J2-4                          | Band 4.1-like protein 3; Band 4.1-like protein 3, N-terminally processed                       | EPB41L3                   | CTSD/PBS | EPB41L3    | not considered/background |  | -0,058548085  | 2 |
| 3091 | Q9Y2Q0-3;Q9Y2Q0-2;Q9Y2Q0;Q4G1C    | Phospholipid-transporting ATPase IA                                                            | ATP8A1                    | CTSD/PBS | ATP8A1     | not considered/background |  | -0,174572547  | 2 |
| 3092 | Q9Y2Q5;Q9Y2Q5-2;Q9Y2Q5-3          | Regulator complex protein LAMTOR2                                                              | LAMTOR2                   | CTSD/PBS | LAMTOR2    | not considered/background |  | -0,163736508  | 2 |
| 3093 | Q9Y2R0;K7EPV0                     | Cytochrome c oxidase assembly factor 3 homolog, mitochondrial                                  | COA3                      | CTSD/PBS | COA3       | not considered/background |  | 0,297250121   | 2 |
| 3094 | Q9Y2T2                            | AP-3 complex subunit mu-1                                                                      | AP3M1                     | CTSD/PBS | AP3M1      | not considered/background |  | -0,2012278    | 2 |
| 3095 | Q9Y2V2;H3B8T3;J1L3X8;H3BSW7;H3B   | Calcium-regulated heat stable protein 1                                                        | CARHSP1                   | CTSD/PBS | CARHSP1    | not considered/background |  |               | 0 |
| 3096 | Q9Y2Z0;Q9Y2Z0-2                   | Suppressor of G2 allele of SKP1 homolog                                                        | SUGT1                     | CTSD/PBS | SUGT1      | not considered/background |  | -0,032905189  | 2 |
| 3097 | Q9Y305;Q9Y305-2;Q9Y305-4;Q9Y305   | Acyl-coenzyme A thioesterase 9, mitochondrial                                                  | ACOT9                     | CTSD/PBS | ACOT9      | not considered/background |  | 0,443906639   | 2 |
| 3098 | Q9Y320-2;Q9Y320                   | Thioredoxin-related transmembrane protein 2                                                    | TMX2                      | CTSD/PBS | TMX2       | not considered/background |  |               | 1 |
| 3099 | Q9Y328;ESRH56;ESRG68;G3XAM5;ES    | Neuron-specific protein family member 2                                                        | NSG2;HMP19                | CTSD/PBS | NSG2       | not considered/background |  | 0,127369147   | 2 |
| 3100 | Q9Y376;A0A087X0K1                 | Calcium-binding protein 39                                                                     | CAB39                     | CTSD/PBS | CAB39      | not considered/background |  | -0,150288908  | 2 |
| 3101 | Q9Y385                            | Ubiquitin-conjugating enzyme E2 11                                                             | UBE2J1                    | CTSD/PBS | UBE2J1     | not considered/background |  |               | 0 |
| 3103 | Q9Y3A4-3;Q9Y3A4;HOY1E4;HOY1E6     | Hydroxymercaptopyruvate lyase family member 7                                                  | HYE1                      | CTSD/PBS | HYE1       | not considered/background |  |               | 1 |
| 3104 | Q9Y3A6;B1AKT3;Q9Y3A6-2            | Transmembrane emp24 domain-containing protein 5                                                | TMED5                     | CTSD/PBS | TMED5      | not considered/background |  |               | 0 |
| 3105 | Q9Y3B3;Q9Y3B3-2;A0A0A6YYA0;Q8B6   | Transmembrane emp24 domain-containing protein 7                                                | TMED7;TMED7-TICAM2        | CTSD/PBS | TMED7      | not considered/background |  | -0,04352696   | 2 |
| 3106 | Q9Y3B7-2;Q9Y3B7;Q9Y3B7-3;HOYCD5   | 39S ribosomal protein L11, mitochondrial                                                       | MRPL11                    | CTSD/PBS | MRPL11     | not considered/background |  | 0,044184258   | 2 |
| 3108 | Q9Y3C6                            | Peptidyl-prolyl cis-trans isomerase-like 1                                                     | PPI1L                     | CTSD/PBS | PPI1L      | not considered/background |  |               | 1 |
| 3109 | Q9Y3D2                            | Methionine-R-sulfoxide reductase B2, mitochondrial                                             | MSRB2                     | CTSD/PBS | MSRB2      | not considered/background |  |               | 0 |
| 3110 | Q9Y3D3;A6ND22;Q9Y3D3-2            | Methionine-R-sulfoxide reductase B2, mitochondrial                                             | MRS16                     | CTSD/PBS | MRS16      | not considered/background |  |               | 0 |
| 3111 | Q9Y3D6                            | Mitochondrial fusion 1 protein                                                                 | FIS1                      | CTSD/PBS | FIS1       | not considered/background |  | 0,092613393   | 2 |
| 3112 | Q9Y3D9;J3QLR8                     | 28S ribosomal protein S23, mitochondrial                                                       | MRPS23                    | CTSD/PBS | MRPS23     | not considered/background |  | 0,285816472   | 2 |
| 3113 | Q9Y3E1;MOR0J3;H3BP8M9;Q7Z455-2    | Hepatoma-derived growth factor-related protein 3;Hepatoma-derived growth factor-related prot   | HGFRFP3                   | CTSD/PBS | HGFRFP3    | not considered/background |  |               | 0 |
| 3114 | Q9Y3F4-2;Q9Y3F4;HOYH33            | Serine-threonine kinase receptor-associated protein                                            | STRAP                     | CTSD/PBS | STRAP      | not considered/background |  | 0,003890027   | 2 |
| 3115 | Q9Y3I0                            | tRNA-splicing ligase RtcB homolog                                                              | RTC8                      | CTSD/PBS | RTC8       | not considered/background |  | 0,219214996   | 2 |
| 3116 | Q9Y3P9;Q9Y3P9-2;Q9Y3P9-3;Q9Y3P9   | Rab GTPase-activating protein 1                                                                | RABGAP1                   | CTSD/PBS | RABGAP1    | not considered/background |  | -0,20966167   | 2 |
| 3117 | Q9Y3Q3;G3V1J9;F5H4M7;Q9Y3Q3-2     | Transmembrane emp24 domain-containing protein 3                                                | TMED3                     | CTSD/PBS | TMED3      | not considered/background |  | 0,388244653   | 2 |
| 3118 | Q9Y3Q4;A0A069K8A5;Q9ULS1;Q6074    | Potassium/sodium hyperpolarization-activated cyclic nucleotide-gated channel 4                 | HCK4                      | CTSD/PBS | HCK4       | not considered/background |  |               | 0 |
| 3119 | Q9Y490                            | Talin-1                                                                                        | TLN1                      | CTSD/PBS | TLN1       | not considered/background |  | 0,110897723   | 2 |
| 3121 | Q9Y4D1-2;Q9Y4D1-3;Q8M7E5          | Dishevelled-associated activator of morphogenesis 1                                            | DAAM1                     | CTSD/PBS | DAAM1      | not considered/background |  | -0,161378952  | 2 |
| 3122 | Q9Y4G6;HOYMT1;A0A180GVU7;HOYN     | Talin-2                                                                                        | TLN2                      | CTSD/PBS | TLN2       | not considered/background |  | -0,300945934  | 2 |
| 3123 | Q9Y4L1;A0A494C039;A0A087X054;E9   | Hypoxia up-regulated protein 1                                                                 | HYOU1                     | CTSD/PBS | HYOU1      | not considered/background |  | 0,103396924   | 2 |
| 3124 | Q9Y4P1-2;C9JIK8;Q9Y4P1-6;Q9Y4P1-3 | Cysteine protease ATG48                                                                        | ATG48                     | CTSD/PBS | ATG48      | not considered/background |  |               | 0 |
| 3126 | Q9Y4W6;K7EP56                     | AFG3-like protein 2                                                                            | AFG3L2                    | CTSD/PBS | AFG3L2     | not considered/background |  | 0,18599337    | 2 |
| 3127 | Q9Y512                            | Sorting and assembly machinery component 50 homolog                                            | SAMM50                    | CTSD/PBS | SAMM50     | not considered/background |  | 0,261100929   | 2 |
| 3129 | Q9Y570;Q9Y570-4;Q9Y570-2;Q9Y570   | Protein phosphatase methyltransferase 1                                                        | PPME1                     | CTSD/PBS | PPME1      | not considered/background |  | -0,394960877  | 2 |
| 3130 | Q9Y584                            | Mitochondrial import inner membrane translocase subunit Tim22                                  | TIMM22                    | CTSD/PBS | TIMM22     | not considered/background |  |               | 0 |
| 3131 | Q9Y5E7                            | Protocadherin beta-2                                                                           | PCDH82                    | CTSD/PBS | PCDH82     | not considered/background |  | 0,111298453   | 2 |
| 3132 | Q9Y5F7;Q9Y5F7-2;A0A087WU59        | Protocadherin gamma-C4                                                                         | PCDHGC4                   | CTSD/PBS | PCDHGC4    | not considered/background |  | -0,02246362   | 2 |
| 3133 | Q9Y5F9;Q9Y5F9-2;Q9Y5F8;Q9Y5G1     | Protocadherin gamma-B6                                                                         | PCDHGB6                   | CTSD/PBS | PCDHGB6    | not considered/background |  | 0,106750315   | 2 |
| 3134 | Q9Y5J7;G3VZF3;A0A1W2PRH9;A0A1V    | Mitochondrial import inner membrane translocase subunit Tim9                                   | TIMM9                     | CTSD/PBS | TIMM9      | not considered/background |  | 0,33845294    | 2 |
| 3135 | Q9Y5L4;K7E1T2                     | Mitochondrial import inner membrane translocase subunit Tim13                                  | TIMM13                    | CTSD/PBS | TIMM13     | not considered/background |  | 0,223793216   | 2 |
| 3136 | Q9Y5M8;H7C4H4;Q9Y528              | Signal recognition particle receptor subunit beta                                              | SRPB                      | CTSD/PBS | SRPB       | not considered/background |  | 0,195977459   | 2 |
| 3137 | Q9Y5S2;HOYLV0;Q5VT25-3;Q5VT25-4   | Serine/threonine-protein kinase MRCK beta                                                      | CDC42BP8                  | CTSD/PBS | CDC42BP8   | not considered/background |  |               | 0 |
| 3139 | Q9Y5Z4;Q9Y5Z4-2;Q5THN1            | Heme-binding protein 2                                                                         | HEBP2                     | CTSD/PBS | HEBP2      | not considered/background |  |               | 0 |
| 3140 | Q9Y617;Q9Y617-2                   | Phosphoserine aminotransferase                                                                 | PSAT1                     | CTSD/PBS | PSAT1      | not considered/background |  | -0,523379827  | 2 |
| 3142 | Q9Y639;Q9Y639-1;Q9YFM8;Q9Y639-4   | Neuropilin                                                                                     | NPTN;DKFZp566H1924        | CTSD/PBS | NPTN       | not considered/background |  | -0,008508085  | 2 |
| 3143 | Q9Y673-2;Q9Y673                   | Dolichyl-phosphate beta-glucosyltransferase                                                    | ALG5                      | CTSD/PBS | ALG5       | not considered/background |  | -0,089436174  | 2 |
| 3144 | Q9Y676;A0A0G2JIC6                 | 28S ribosomal protein S18b, mitochondrial                                                      | MRPS18B                   | CTSD/PBS | MRPS18B    | not considered/background |  |               | 1 |
| 3145 | Q9Y678;Q9Y678-2;Q9YBF2            | Cootman subunit gamma-1                                                                        | COPG1                     | CTSD/PBS | COPG1      | not considered/background |  | -0,279283757  | 2 |
| 3146 | Q9Y679-3;Q9Y679                   | Ancient ubiquitous protein 1                                                                   | AUP1                      | CTSD/PBS | AUP1       | not considered/background |  | -0,228215815  | 2 |
| 3147 | Q9Y697-2;Q9Y697;Q9Y697-3;F2Z2E7   | Cysteine desulfurase, mitochondrial                                                            | NFS1                      | CTSD/PBS | NFS1       | not considered/background |  | 0,626392409   | 2 |
| 3149 | Q9Y6C9                            | Mitochondrial carrier homolog 2                                                                | MTCH2                     | CTSD/PBS | MTCH2      | not considered/background |  | 0,091801369   | 2 |
| 3150 | Q9Y6G9;E9PHI6;C9JGM7;C9JLW1       | Cytoplasmic dynein 1 light intermediate chain 1                                                | DYNC1L1                   | CTSD/PBS | DYNC1L1    | not considered/background |  | -0,124440092  | 2 |
| 3151 | Q9Y6I3-3;Q9Y6I3;Q9Y6I3-1;D6R907   | D Epsin-1                                                                                      | EPN1                      | CTSD/PBS | EPN1       | not considered/background |  | 0,188527527   | 2 |
| 3152 | Q9Y6I9;C9JIK7;C9JHHS;A0A087WU1U   | Testis-expressed sequence 264 protein                                                          | TEX264                    | CTSD/PBS | TEX264     | not considered/background |  |               | 0 |
| 3153 | Q9Y6K8-3;Q9Y6K8;Q9Y6K8-2;HOYE21   | Adenylyl kinase isoenzyme 5                                                                    | AK5                       | CTSD/PBS | AK5        | not considered/background |  |               | 0 |
| 3154 | Q9Y6M4-2;Q9Y6M4;Q9Y6M4-5;Q9Y6A    | Casein kinase I isoform gamma-3; Casein kinase I isoform gamma-1                               | CSNK1G3;hCG_2004507;CSNK1 | CTSD/PBS | CSNK1G3    | not considered/background |  |               | 0 |
| 3155 | Q9Y6M7-7;Q9Y6M7-6;Q9Y6M7-8;Q9Y    | Sodium bicarbonate cotransporter 3; Anion exchange protein                                     | SLCA47                    | CTSD/PBS | SLCA47     | not considered/background |  | 0,700972307   | 2 |
| 3156 | Q9Y6Y8-2;Q9Y6Y8;A0A0C4D8H2;H7C4   | SEC23-interacting protein                                                                      | SEC23IP                   | CTSD/PBS | SEC23IP    | not considered/background |  |               | 0 |
| 3209 | S4R3N1;Q9Y3A3-2;Q9Y3A3-3;Q9Y3A3   |                                                                                                | HSPF1-MOB4                | CTSD/PBS | HSPF1-MOB4 | not considered/background |  | 0,455018097   | 2 |
